# Supplementary material for: Genomic homeostasis is dysregulated in favour of apoptosis in the colonic epithelium of the azoxymethane treated rat
Source: PubMed Central journal article supplement (PMC3561103; doi:10.1186/1472-6793-13-2), 2013-01-23
Supplement: 1472-6793-13-2-S1.pdf [file 1472-6793-13-2-S1.pdf]

**Table S1: Lists of transcript contrasts between proximal and distal in the normal epithelium (saline), between saline and AOM epithelium in the proximal and again distal colon.**

| SALINE: Distal versus Proximal |                        |             |              | PROXIMAL: Saline versus AOM |                      |          |            | DISTAL: Saline versus AOM |                |         |            |
|--------------------------------|------------------------|-------------|--------------|-----------------------------|----------------------|----------|------------|---------------------------|----------------|---------|------------|
| ID                             | symbol                 | t           | adj.P.Val    | ID                          | symbol               | t        | adj.P.Val  | Probe ID                  | symbol         | t       | adj.P.Val  |
| 1368467_at                     | "Cyp4f1"               | " 127.9239" | "0.00000000" | 1394564_at                  | NA                   | -18.2403 | 0.00000002 | 1367764_at                | Ccng1          | -16.623 | 0          |
| 1383878_at                     | "Hoxd10_predicted"     | "-110.6893" | "0.00000000" | 1374495_at                  | Lrba_predicted       | 17.7553  | 0.00000005 | 1374347_at                | Cdkal1         | 23.3626 | 0          |
| 1385258_at                     | "B3gnt7"               | "-77.7640"  | "0.00000000" | 1396763_at                  | LOC301455            | 17.0256  | 0.00000005 | 1368513_at                | Enpep          | 16.9854 | 0          |
| 1368746_a_at                   | "Atp12a"               | "-60.7514"  | "0.00000000" | 1368106_at                  | Plk2                 | -16.8478 | 0.00000006 | 1381445_at                | Esrrg          | 18.5234 | 0          |
| 1387994_at                     | "Hsd17b6"              | " 56.1454"  | "0.00000000" | 1394456_at                  | NA                   | 16.7966  | 0.00000006 | 1370153_at                | Gdf15          | -26.584 | 0          |
| 1383014_at                     | NA                     | " 42.1280"  | "0.00000000" | 1383770_at                  | NA                   | 16.9002  | 0.00000006 | 1383491_at                | Isg2011_pre    | -17.742 | 0          |
| 1387254_at                     | "Ghrl"                 | " 40.7556"  | "0.00000000" | 1379117_at                  | NA                   | 16.6013  | 0.00000008 | 1378334_a_at              | lptr2          | 18.1964 | 0          |
| 1369732_a_at                   | "St3gal2"              | "-38.5068"  | "0.00000000" | 1387969_at                  | Cxcl10               | -16.4933 | 0.00000009 | 1396763_at                | LOC301455      | 25.1332 | 0          |
| 1394264_at                     | "RGD1561144_predicted" | "-38.4072"  | "0.00000000" | 1373892_at                  | Fbxl17_predicted     | 15.6726  | 0.0000002  | 1390552_at                | Magi1          | 18.3569 | 0          |
| 1392444_at                     | "RGD1561144_predicted" | "-38.2809"  | "0.00000000" | 1383069_at                  | LOC680726            | 15.4429  | 0.00000026 | 1387809_at                | Map2k6         | 16.5718 | 0          |
| 1376775_at                     | "RGD1309969"           | " 38.2342"  | "0.00000000" | 1389150_at                  | NA                   | 15.4163  | 0.00000027 | 1380017_at                | NA             | 17.3843 | 0          |
| 1383757_at                     | NA                     | "-37.7027"  | "0.00000000" | 1374586_at                  | LOC689079            | 15.1824  | 0.00000034 | 1379597_at                | NA             | 30.294  | 0          |
| 1369090_at                     | "Prkg2"                | " 36.7766"  | "0.00000000" | 1378457_at                  | NA                   | 15.0492  | 0.0000004  | 1368053_at                | Pard3          | 27.7246 | 0          |
| 1377643_at                     | "Hoxd10_predicted"     | "-36.0480"  | "0.00000000" | 1387809_at                  | Map2k6               | 14.884   | 0.00000048 | 1375224_at                | Phlda3         | -17.092 | 0          |
| 1380133_at                     | "Osr2"                 | " 35.8002"  | "0.00000000" | 1388738_at                  | RGD1563485_predicted | 14.647   | 0.00000063 | 1374042_at                | RGD1310453_pre | 18.5935 | 0          |
| 1379107_at                     | "Slc4a4"               | " 35.4450"  | "0.00000000" | 1394290_at                  | NA                   | 14.2394  | 0.000001   | 1381607_at                | Zfp407         | 19.1243 | 0          |
| 1373333_at                     | "MGC109340"            | " 34.8190"  | "0.00000000" | 1390240_at                  | NA                   | 14.2115  | 0.00000103 | 1388639_at                | Bcas3          | 22.9047 | 0          |
| 1377635_at                     | "Fmo2"                 | "-34.7043"  | "0.00000000" | 1388825_at                  | NA                   | 13.9677  | 0.00000138 | 1388738_at                | Atrnl1         | 23.6839 | 0          |
| 1382031_at                     | NA                     | "-34.6443"  | "0.00000000" | 1384227_at                  | Ptprk                | 13.9273  | 0.00000144 | 1369777_a_at              | Shank2         | 20.1273 | 0          |
| 1367969_at                     | "Prdx6"                | " 33.6355"  | "0.00000000" | 1387306_a_at                | Egr2                 | -13.7039 | 0.00000188 | 1373718_at                | Tubb2b         | -16.57  | 0          |
| 1386907_at                     | "Eno3"                 | "-32.4485"  | "0.00000000" | 1373207_at                  | NA                   | 13.626   | 0.00000207 | 1395132_at                | Utrn           | 16.9349 | 0          |
| 1388619_at                     | "Rdx"                  | "-32.3928"  | "0.00000000" | 1388639_at                  | RGD1560788_predicted | 13.6151  | 0.0000021  | 1371520_at                | Znf291         | 19.8905 | 0          |
| 1371615_at                     | "Dgat2"                | " 30.7888"  | "0.00000000" | 1390552_at                  | LOC500261            | 13.4795  | 0.00000247 | 1380546_at                | LOC298250      | 15.3376 | 0.00000001 |
| 1368168_at                     | "Slc34a2"              | "-30.2798"  | "0.00000000" | 1397622_at                  | Ddx46                | 13.285   | 0.00000314 | 1390189_at                | LOC298977      | 15.0793 | 0.00000001 |
| 1392647_at                     | "LOC687992"            | " 30.1763"  | "0.00000000" | 1370905_at                  | Dock9                | 13.2743  | 0.00000318 | 1376132_at                | Gtdc1          | 14.9889 | 0.00000001 |
| 1383146_at                     | "RGD1562629_predicted" | " 29.9941"  | "0.00000000" | 1376774_at                  | Exoc4                | 13.2104  | 0.00000344 | 1376747_at                | Magi1          | 14.8143 | 0.00000001 |
| 1391045_at                     | "Dgat2"                | " 29.9189"  | "0.00000000" | 1369995_at                  | Faf1                 | 13.1854  | 0.00000355 | 1396872_at                | Magi1          | 16.2841 | 0.00000001 |
| 1387092_at                     | "Fxyd4"                | "-29.7550"  | "0.00000000" | 1374846_at                  | Clp1                 | -13.1748 | 0.00000359 | 1381005_at                | LOC682925      | 15.6139 | 0.00000001 |
| 1372479_at                     | NA                     | " 28.1042"  | "0.00000000" | 1367764_at                  | Ccng1                | -13.086  | 0.00000401 | 1374586_at                | ARL15          | 14.8888 | 0.00000001 |
| 1387999_at                     | "Slc18a1"              | " 27.8937"  | "0.00000000" | 1383166_at                  | Ncoa1_predicted      | 12.9898  | 0.00000453 | 1375888_at                | LOC691036      | 15.7124 | 0.00000001 |
| 1378287_at                     | "Rdx"                  | "-27.5963"  | "0.00000000" | 1379107_at                  | Slc4a4               | 12.9203  | 0.00000494 | 1377749_at                | NA             | -16.201 | 0.00000001 |
| 1370371_a_at                   | "Ceacam10"             | "-27.4230"  | "0.00000000" | 1394577_at                  | NA                   | 12.908   | 0.00000502 | 1389186_at                | NA             | 15.5324 | 0.00000001 |
| 1375925_at                     | NA                     | "-27.3230"  | "0.00000000" | 1379824_at                  | Tox_predicted        | 12.6908  | 0.00000661 | 1379117_at                | NA             | 16.0637 | 0.00000001 |
| 1393808_at                     | "Wdr59"                | " 27.1602"  | "0.00000000" | 1389102_at                  | RGD1566072_predicted | 12.6331  | 0.00000712 | 1395613_at                | Pard3          | 15.8741 | 0.00000001 |
| 1371360_at                     | "Ndrgr1"               | " 26.9024"  | "0.00000000" | 1391460_at                  | NA                   | 12.6026  | 0.00000741 | 1370182_at                | Ptprn2         | 15.1325 | 0.00000001 |
| 1388743_at                     | NA                     | " 26.5868"  | "0.00000000" | 1388723_at                  | Bre                  | 12.3929  | 0.00000972 | 1372019_at                | Med10          | -15.064 | 0.00000001 |
| 1386344_at                     | "Ank"                  | " 26.4345"  | "0.00000000" | 1384504_at                  | NA                   | 12.3816  | 0.00000986 | 1385271_at                | RGD1565731_pre | 15.0179 | 0.00000001 |
| 1368167_at                     | "Ctse"                 | "-26.2150"  | "0.00000000" | 1383795_at                  | NA                   | 12.3352  | 0.00001048 | 1370474_at                | Thrb           | 15.1202 | 0.00000001 |
| 1368858_at                     | "Ugt8"                 | " 25.8033"  | "0.00000000" | 1368321_at                  | Egr1                 | -12.3161 | 0.00001074 | 1387127_at                | Atrn           | 14.3762 | 0.00000002 |
| 1371044_at                     | "Pde7a"                | "-25.5031"  | "0.00000000" | 1379980_at                  | NA                   | 12.1928  | 0.00001263 | 1367994_at                | Dpyd           | 14.3682 | 0.00000002 |
| 1390812_a_at                   | "RGD1562829_predicted" | " 25.4623"  | "0.00000000" | 1397698_at                  | Fbxl17_predicted     | 12.1915  | 0.00001266 | 1387306_a_at              | Egr2           | -14.254 | 0.00000002 |
| 1368034_at                     | "Chgb"                 | " 25.2953"  | "0.00000000" | 1376132_at                  | LOC362129            | 12.1684  | 0.00001305 | 1376774_at                | Exoc4          | 14.7666 | 0.00000002 |
| 1371835_at                     | "Prkacb"               | "-25.2173"  | "0.00000000" | 1380387_at                  | RGD1559697_predicted | 12.1569  | 0.00001325 | 1390183_at                | LOC360990      | 14.2004 | 0.00000002 |
| 1376319_at                     | NA                     | "-25.1106"  | "0.00000000" | 1389388_at                  | NA                   | 12.1538  | 0.0000133  | 1381402_at                | NA             | 14.6533 | 0.00000002 |
| 1377803_at                     | "RGD1305351"           | "-25.0838"  | "0.00000000" | 1389180_at                  | NA                   | 12.1051  | 0.00001419 | 1370724_a_at              | Nfia           | 14.4353 | 0.00000002 |
| 1374060_at                     | NA                     | "-24.7049"  | "0.00000000" | 1376071_at                  | NA                   | 12.0399  | 0.00001548 | 1367847_at                | Nupr1          | -14.435 | 0.00000002 |

|              |                        |             |              |            |                      |          |            |              |                      |         |            |
|--------------|------------------------|-------------|--------------|------------|----------------------|----------|------------|--------------|----------------------|---------|------------|
| 1369195_at   | "Fabp2"                | " 24.6860"  | "0.00000000" | 1384427_at | Mdm2_predicted       | -12.0275 | 0.00001574 | 1374341_at   | Thap7                | -14.495 | 0.00000002 |
| 1394574_at   | "Prdx6"                | " 24.4506"  | "0.00000000" | 1383064_at | NA                   | 12.0169  | 0.00001596 | 1383069_at   | LOC680726            | 13.7689 | 0.00000003 |
| 1388337_at   | "Np"                   | " -24.3058" | "0.00000000" | 1390437_at | NA                   | 12.0123  | 0.00001606 | 1372833_at   | NA                   | 13.9949 | 0.00000003 |
| 1393961_at   | NA                     | " -24.0366" | "0.00000000" | 1390193_at | NA                   | 11.9069  | 0.0000185  | 1395203_at   | NA                   | 14.0382 | 0.00000003 |
| 1385709_x_at | "Ank"                  | " 23.8768"  | "0.00000000" | 1377760_at | Noc4l                | -11.8075 | 0.00002116 | 1384227_at   | Ptprk                | 14.0653 | 0.00000003 |
| 1368754_at   | "P2ry6"                | " -23.8485" | "0.00000000" | 1376747_at | LOC500261            | 11.7744  | 0.00002213 | 1376416_at   | RGD1309461           | 14.0782 | 0.00000003 |
| 1372476_at   | "Fads3"                | " -23.8424" | "0.00000000" | 1381418_at | NA                   | 11.7111  | 0.00002412 | 1374852_at   | RGD1559909_predicted | -13.825 | 0.00000003 |
| 1393018_at   | NA                     | " 23.7465"  | "0.00000000" | 1374593_at | Prkce                | 11.6867  | 0.00002493 | 1382117_at   | RGD1560538_predicted | -13.815 | 0.00000003 |
| 1383472_at   | "Aldh1b1"              | " 23.6881"  | "0.00000000" | 1370163_at | Odc1                 | -11.6416 | 0.00002652 | 1368834_at   | Camk2d               | 13.4361 | 0.00000004 |
| 1384594_at   | "Ltk_predicted"        | " -23.3358" | "0.00000000" | 1385128_at | NA                   | 11.5419  | 0.00003041 | 1387979_at   | Golgb1               | 13.7429 | 0.00000004 |
| 1380139_at   | NA                     | " 23.2565"  | "0.00000000" | 1379597_at | NA                   | 11.4684  | 0.00003367 | 1374131_at   | NA                   | 13.4182 | 0.00000004 |
| 1392055_at   | "RGD1561188_predicted" | " 23.2347"  | "0.00000000" | 1384198_at | Cova1_predicted      | 11.4609  | 0.00003402 | 1380180_at   | NA                   | 13.5369 | 0.00000004 |
| 1368435_at   | "Cyp8b1"               | " 23.0799"  | "0.00000000" | 1377751_at | NA                   | 11.4164  | 0.00003619 | 1395029_at   | NA                   | 13.6515 | 0.00000004 |
| 1397053_at   | "RGD1562829_predicted" | " 23.0328"  | "0.00000000" | 1386962_at | Plcb4                | 11.3998  | 0.00003704 | 1371056_at   | Neo1                 | 13.6742 | 0.00000004 |
| 1368282_at   | "Dpep1"                | " 23.0263"  | "0.00000000" | 1389011_at | RGD1305156           | 11.391   | 0.00003749 | 1369678_a_at | Nfia                 | 13.4176 | 0.00000004 |
| 1369111_at   | "Fabp1"                | " 23.0065"  | "0.00000000" | 1389128_at | Wdfy3_predicted      | 11.3466  | 0.00003989 | 1389261_at   | RGD1305508_predicted | -13.701 | 0.00000004 |
| 1370811_at   | "Mps1"                 | " 22.8214"  | "0.00000000" | 1368834_at | Camk2d               | 11.3461  | 0.00003992 | 1380387_at   | RGD1559697_predicted | 13.4906 | 0.00000004 |
| 1387669_a_at | "Ephx1"                | " 22.7338"  | "0.00000000" | 1392972_at | Trio                 | 11.2973  | 0.00004274 | 1371785_at   | Tnfrsf12a            | -13.603 | 0.00000004 |
| 1370420_at   | "Srd5a1"               | " 22.4589"  | "0.00000000" | 1377884_at | RGD1560155_predicted | 11.2534  | 0.00004546 | 1396076_at   | NA                   | 13.2952 | 0.00000005 |
| 1393439_a_at | "Ank"                  | " 22.4082"  | "0.00000000" | 1373430_at | Baz2b_predicted      | 11.2149  | 0.00004799 | 1390453_at   | NA                   | 13.3053 | 0.00000005 |
| 1380536_at   | "RGD1305928_predicted" | " 22.3846"  | "0.00000000" | 1388870_at | RGD1560397_predicted | 11.084   | 0.00005777 | 1377697_at   | RGD1562438_predicted | 13.2518 | 0.00000005 |
| 1387315_at   | "Sftpd"                | " -22.3517" | "0.00000000" | 1390453_at | NA                   | 11.0801  | 0.00005808 | 1378902_at   | Rsaf1_predicted      | 13.2729 | 0.00000005 |
| 1381528_at   | "St3gal2"              | " -22.3068" | "0.00000000" | 1389923_at | Btbd9                | 11.0062  | 0.00006454 | 1387002_at   | G10                  | -13.093 | 0.00000006 |
| 1390569_at   | "Cndp1"                | " 22.3039"  | "0.00000000" | 1383743_at | Lrrc16_predicted     | 10.9767  | 0.00006733 | 1387405_at   | Garnl1               | 13.1193 | 0.00000006 |
| 1383825_at   | "Rdx"                  | " -22.2667" | "0.00000000" | 1373502_at | Dym_predicted        | 10.9139  | 0.00007368 | 1380912_at   | Glrp1_predicted      | 13.0252 | 0.00000006 |
| 1385175_at   | "Hoxb13_predicted"     | " -22.2419" | "0.00000000" | 1376194_at | NA                   | 10.8766  | 0.00007775 | 1396831_at   | Glrp1_predicted      | 13.161  | 0.00000006 |
| 1383343_at   | "LOC690559"            | " 22.2224"  | "0.00000000" | 1396872_at | LOC500261            | 10.8254  | 0.00008373 | 1372449_at   | NA                   | 13.1055 | 0.00000006 |
| 1384772_at   | "Prkacb"               | " -22.1993" | "0.00000000" | 1374591_at | RGD1561090_predicted | 10.7905  | 0.00008807 | 1373207_at   | NA                   | 13.1444 | 0.00000006 |
| 1387988_at   | "Hsd3b6"               | " 22.0762"  | "0.00000000" | 1387116_at | Dnajb9               | -10.7842 | 0.00008888 | 1377760_at   | Noc4l                | -13.128 | 0.00000006 |
| 1390825_at   | "Slc35b3_predicted"    | " 21.9488"  | "0.00000000" | 1385271_at | RGD1565731_predicted | 10.7753  | 0.00009004 | 1375686_at   | Ppil3                | -13.151 | 0.00000006 |
| 1374073_at   | "RGD1309472"           | " -21.9429" | "0.00000000" | 1389310_at | NA                   | 10.7091  | 0.00009915 | 1371724_at   | Rexo2                | -13.068 | 0.00000006 |
| 1370746_at   | "Prkacb"               | " -21.8730" | "0.00000000" | 1379663_at | Cachd1_predicted     | 10.6794  | 0.00010355 | 1395148_at   | RGD1561090_predicted | 13.0666 | 0.00000006 |
| 1395810_at   | NA                     | " 21.7302"  | "0.00000000" | 1379578_at | Zbtb20_predicted     | 10.6709  | 0.00010485 | 1390987_at   | RGD1565283_predicted | 13.1237 | 0.00000006 |
| 1367566_at   | "Scgb1a1"              | " -21.6560" | "0.00000000" | 1383103_at | LOC680620            | 10.6508  | 0.00010798 | 1378943_at   | RGD1566072_predicted | 13.0313 | 0.00000006 |
| 1379445_at   | NA                     | " 21.6463"  | "0.00000000" | 1383931_at | Ptprk                | 10.6384  | 0.00010997 | 1368123_at   | Igf1r                | 12.8671 | 0.00000007 |
| 1374029_at   | NA                     | " 21.4056"  | "0.00000000" | 1383485_at | Mdm2_predicted       | -10.6211 | 0.00011278 | 1395595_at   | Mki67ip              | -12.797 | 0.00000007 |
| 1374284_at   | "Rassf4"               | " 21.3211"  | "0.00000000" | 1368053_at | Pard3                | 10.6143  | 0.00011392 | 1383494_at   | RGD1562788_predicted | 12.8094 | 0.00000007 |
| 1395153_at   | "Cldn15_predicted"     | " 21.2839"  | "0.00000000" | 1371949_at | Bzw1                 | -10.554  | 0.0001245  | 1389923_at   | Btbd9                | 12.7211 | 0.00000008 |
| 1382612_at   | "Hoxa9_predicted"      | " 21.1488"  | "0.00000000" | 1389431_at | Prkdc_predicted      | 10.5327  | 0.00012849 | 1388443_at   | Cdk2ap1_predicted    | -12.771 | 0.00000008 |
| 1385464_at   | "Foxq1"                | " -21.1346" | "0.00000000" | 1389159_at | NA                   | 10.5147  | 0.00013194 | 1374846_at   | Clp1                 | -12.584 | 0.00000008 |
| 1369785_at   | "Ppat"                 | " -21.1199" | "0.00000000" | 1368955_at | Cask                 | 10.5121  | 0.00013246 | 1397698_at   | Fbxl17_predicted     | 12.5791 | 0.00000008 |
| 1377123_at   | "Slc27a4"              | " 21.0207"  | "0.00000000" | 1368019_at | Frap1                | 10.486   | 0.00013767 | 1382794_at   | Galt10               | 12.7072 | 0.00000008 |
| 1379936_at   | "Tpm1"                 | " -20.9438" | "0.00000000" | 1383491_at | lsg2011_predicted    | -10.4184 | 0.00015223 | 1391046_at   | LOC498295            | 12.6438 | 0.00000008 |
| 1371101_at   | "Ryk"                  | " -20.9376" | "0.00000000" | 1391916_at | NA                   | 10.3556  | 0.00016719 | 1383288_at   | Mdm2_predicted       | -12.668 | 0.00000008 |
| 1372374_at   | "Car1_predicted"       | " 20.7692"  | "0.00000000" | 1390289_at | RGD1311375_predicted | 10.2768  | 0.00018817 | 1383493_at   | NA                   | 12.6422 | 0.00000008 |
| 1380285_at   | "Chrd"                 | " 20.7585"  | "0.00000000" | 1371633_at | Ctnnb1               | 10.225   | 0.00020347 | 1379277_at   | NA                   | 12.6753 | 0.00000008 |
| 1370547_at   | "Pzp"                  | " 20.6081"  | "0.00000000" | 1381607_at | RGD1310645_predicted | 10.2098  | 0.00020819 | 1382758_at   | P7                   | 12.6648 | 0.00000008 |
| 1374531_at   | NA                     | " 20.5694"  | "0.00000000" | 1389355_at | Ier5                 | -10.2095 | 0.00020827 | 1371631_at   | RGD1304686           | -12.576 | 0.00000008 |
| 1391251_at   | NA                     | " 20.5572"  | "0.00000000" | 1383498_at | NA                   | 10.0968  | 0.00024714 | 1372845_at   | Rpp21                | -12.729 | 0.00000008 |
| 1385246_at   | NA                     | " 20.5350"  | "0.00000000" | 1390010_at | Ncoa1_predicted      | 10.0272  | 0.00027487 | 1387374_at   | Tcf12                | 12.6585 | 0.00000008 |

|              |                        |            |              |              |                      |          |            |              |                      |         |            |
|--------------|------------------------|------------|--------------|--------------|----------------------|----------|------------|--------------|----------------------|---------|------------|
| 1386926_at   | "AcsI5"                | "-20.2690" | "0.00000000" | 1383494_at   | RGD1562788_predicted | 10.0146  | 0.00028024 | 1371505_at   | Hnrpc                | -12.474 | 0.00000009 |
| 1387791_at   | "Ace"                  | "20.2164"  | "0.00000000" | 1389655_at   | RGD1306819           | -10.0119 | 0.0002814  | 1374495_at   | Lrba_predicted       | 12.5191 | 0.00000009 |
| 1368281_at   | "Dpep1"                | "20.2036"  | "0.00000000" | 1391169_at   | RGD1562562_predicted | 9.9938   | 0.00028934 | 1390010_at   | Ncoa1_predicted      | 12.46   | 0.00000009 |
| 1375863_a_at | NA                     | "-20.2012" | "0.00000000" | 1381445_at   | Esrrg                | 9.9694   | 0.00030004 | 1389431_at   | Prkdc_predicted      | 12.5524 | 0.00000009 |
| 1370530_a_at | "Plid1"                | "19.9225"  | "0.00000000" | 1373265_at   | NA                   | 9.891    | 0.00033901 | 1383017_at   | Ptprm                | 12.466  | 0.00000009 |
| 1378606_at   | NA                     | "19.8974"  | "0.00000000" | 1388554_at   | Bzw1                 | -9.8836  | 0.00034289 | 1378445_at   | RGD1561537_predicted | 12.4925 | 0.00000009 |
| 1377058_at   | "RGD1564160_predicted" | "-19.8571" | "0.00000000" | 1389613_at   | NA                   | 9.8826   | 0.00034341 | 1388906_at   | RGD1564930_predicted | 12.5443 | 0.00000009 |
| 1398341_at   | "RGD1559720_predicted" | "19.7327"  | "0.00000000" | 1373530_at   | Ccne1                | -9.7942  | 0.00039399 | 1398876_at   | Abcf1                | -12.278 | 0.00000001 |
| 1385767_at   | "LOC304000"            | "19.4867"  | "0.00000000" | 1379277_at   | NA                   | 9.717    | 0.00044445 | 1388601_at   | Abt1                 | -12.272 | 0.00000001 |
| 1369381_a_at | "Slc15a1"              | "-19.4668" | "0.00000000" | 1381871_at   | LOC500261            | 9.6585   | 0.00048718 | 1397622_at   | Ddx46                | 12.2408 | 0.00000001 |
| 1383978_at   | NA                     | "-19.4660" | "0.00000000" | 1373393_at   | LOC299907            | 9.6582   | 0.00048739 | 1372189_at   | Dnajc13_predicted    | 12.2992 | 0.00000001 |
| 1373028_at   | "Ryk"                  | "-19.3243" | "0.00000000" | 1389476_at   | RGD1307100           | 9.6577   | 0.00048781 | 1388154_at   | E2f5                 | -12.405 | 0.00000001 |
| 1377412_at   | NA                     | "19.3113"  | "0.00000000" | 1379500_at   | LOC498404            | -9.6468  | 0.00049623 | 1368225_at   | Exoc2                | 12.2781 | 0.00000001 |
| 1370299_at   | "Aldob"                | "19.2783"  | "0.00000000" | 1374466_at   | NA                   | 9.6383   | 0.00050291 | 1373892_at   | Fbxl17_predicted     | 12.3882 | 0.00000001 |
| 1387123_at   | "Cyp17a1"              | "-19.2631" | "0.00000000" | 1398392_at   | NA                   | 9.6314   | 0.00050841 | 1377653_at   | LOC366669            | 12.3779 | 0.00000001 |
| 1369531_at   | "Sult1c2"              | "19.2371"  | "0.00000000" | 1383288_at   | Mdm2_predicted       | -9.6285  | 0.00051072 | 1389024_at   | LOC498353            | 12.2354 | 0.00000001 |
| 1375295_at   | "Cs"                   | "-19.2104" | "0.00000000" | 1370893_at   | Acaca                | 9.5978   | 0.00053607 | 1382001_at   | LOC502710            | 12.3495 | 0.00000001 |
| 1387235_at   | "Chga"                 | "19.1331"  | "0.00000000" | 1390217_at   | Garnl1               | 9.59     | 0.00054276 | 1372815_at   | Magoh_predicted      | -12.237 | 0.00000001 |
| 1393945_at   | NA                     | "19.0817"  | "0.00000000" | 1382993_at   | Bbc3                 | -9.5227  | 0.00060386 | 1389167_at   | Mapkap1              | 12.3025 | 0.00000001 |
| 1395814_at   | NA                     | "-19.0627" | "0.00000000" | 1379244_at   | NA                   | 9.5205   | 0.00060595 | 1390437_at   | NA                   | 12.2374 | 0.00000001 |
| 1374081_at   | "Casc4_predicted"      | "19.0408"  | "0.00000000" | 1372744_at   | Pkp4_predicted       | 9.4874   | 0.00063866 | 1376103_at   | NA                   | 12.242  | 0.00000001 |
| 1387121_a_at | "Ndrg2"                | "-19.0340" | "0.00000000" | 1386959_a_at | Map2k5               | 9.4688   | 0.00065794 | 1389371_at   | NA                   | 12.3234 | 0.00000001 |
| 1391684_at   | "Tmem14a_predicted"    | "18.9416"  | "0.00000000" | 1376273_at   | Rnasen               | 9.4105   | 0.00072207 | 1374262_at   | NA                   | 12.3431 | 0.00000001 |
| 1372330_at   | "LOC652955"            | "18.8537"  | "0.00000000" | 1389371_at   | NA                   | 9.3632   | 0.00077909 | 1378091_at   | NA                   | 12.3439 | 0.00000001 |
| 1383104_at   | "RGD1561459_predicted" | "18.7808"  | "0.00000000" | 1369777_a_at | Shank2               | 9.3288   | 0.00082334 | 1395704_at   | NA                   | 12.3707 | 0.00000001 |
| 1369007_at   | "Nr4a2"                | "-18.7535" | "0.00000000" | 1367790_at   | Snd1                 | 9.3223   | 0.00083206 | 1389698_at   | NA                   | 12.3864 | 0.00000001 |
| 1369162_at   | "Gucy2c"               | "18.7338"  | "0.00000000" | 1383194_a_at | NA                   | 9.2969   | 0.00086683 | 1370489_a_at | Plcb4                | 12.2778 | 0.00000001 |
| 1375266_at   | "Slc6a9"               | "-18.6721" | "0.00000000" | 1393772_at   | NA                   | -9.2703  | 0.00090489 | 1388310_at   | Sui1-rs1_predicted   | -12.225 | 0.00000001 |
| 1370623_at   | "Fgl2"                 | "18.6662"  | "0.00000000" | 1374743_at   | RGD1565362_predicted | 9.2656   | 0.00091174 | 1388130_at   | Epha1_predicted      | -12.128 | 0.00000011 |
| 1390471_at   | "Tpm1"                 | "-18.6382" | "0.00000000" | 1394510_at   | NA                   | 9.2581   | 0.00092295 | 1388990_at   | Mki67ip              | -12.127 | 0.00000011 |
| 1395355_at   | NA                     | "18.5301"  | "0.00000000" | 1392044_at   | NA                   | 9.2542   | 0.00092887 | 1376275_at   | NA                   | -12.112 | 0.00000011 |
| 1370392_at   | "Trpm4"                | "18.5263"  | "0.00000000" | 1389291_at   | Chchd3_predicted     | 9.2397   | 0.00095083 | 1394510_at   | NA                   | 12.0927 | 0.00000011 |
| 1388138_at   | "Thbs4"                | "-18.4667" | "0.00000001" | 1377576_at   | Ppa2_predicted       | 9.2361   | 0.00095646 | 1372708_at   | NA                   | 12.0942 | 0.00000011 |
| 1389142_at   | "LOC691966"            | "18.3565"  | "0.00000001" | 1395998_at   | Nol5a                | -9.1575  | 0.00108689 | 1382162_at   | NA                   | 12.166  | 0.00000011 |
| 1395148_at   | "RGD1561090_predicted" | "18.3310"  | "0.00000001" | 1373479_at   | Ppp3ca               | 9.1461   | 0.00110733 | 1386529_at   | NA                   | 12.1854 | 0.00000011 |
| 1372255_at   | "Rars_predicted"       | "-18.3043" | "0.00000001" | 1399056_at   | LOC365592            | 9.129    | 0.00113858 | 1390204_at   | NA                   | 12.1995 | 0.00000011 |
| 1370468_at   | "Slc13a1"              | "18.2699"  | "0.00000001" | 1388352_at   | Nat5_predicted       | -9.1106  | 0.00117332 | 1388180_at   | Phax                 | -12.202 | 0.00000011 |
| 1373586_at   | NA                     | "-18.1749" | "0.00000001" | 1392653_at   | NA                   | 9.1071   | 0.00118007 | 1389476_at   | RGD1307100           | 12.1753 | 0.00000011 |
| 1390050_at   | "LOC680692"            | "-18.1462" | "0.00000001" | 1385798_at   | NA                   | 9.0652   | 0.00126406 | 1391731_at   | NA                   | 12.0494 | 0.00000012 |
| 1375247_at   | "Mgll"                 | "18.0481"  | "0.00000001" | 1367994_at   | Dpyd                 | 9.0615   | 0.00127172 | 1373419_at   | Ptprg                | 12.0774 | 0.00000012 |
| 1370948_a_at | "Marcks"               | "-18.0391" | "0.00000001" | 1390343_at   | Ccnc                 | -9.0489  | 0.00129838 | 1388780_at   | Terf2ip              | -12.064 | 0.00000012 |
| 1371479_at   | "Mettl7a"              | "17.9921"  | "0.00000001" | 1388622_at   | Nol5a                | -9.0244  | 0.00135172 | 1367719_at   | Dd5                  | 11.9843 | 0.00000013 |
| 1377116_at   | "Rnasel"               | "17.8808"  | "0.00000001" | 1390709_at   | Trio                 | 9.0107   | 0.00138276 | 1383382_at   | LOC681740            | 11.9639 | 0.00000013 |
| 1393057_at   | "LOC308320"            | "-17.8064" | "0.00000001" | 1395148_at   | RGD1561090_predicted | 9.0001   | 0.00140696 | 1393409_at   | NA                   | 11.9913 | 0.00000013 |
| 1388644_at   | "Mgll"                 | "17.7546"  | "0.00000001" | 1374131_at   | NA                   | 8.9802   | 0.00145392 | 1368106_at   | Plk2                 | -12.003 | 0.00000013 |
| 1368869_at   | "Akap12"               | "-17.7239" | "0.00000001" | 1381685_a_at | RGD1305773_predicted | 8.974    | 0.00146897 | 1372634_at   | Adprhl2_predicted    | -11.912 | 0.00000014 |
| 1387193_a_at | "Spink1"               | "-17.6947" | "0.00000001" | 1390865_at   | LOC681395            | 8.9622   | 0.00149792 | 1371423_at   | Mrpl41               | -11.872 | 0.00000014 |
| 1392905_at   | "Gng2"                 | "-17.6916" | "0.00000001" | 1371571_at   | App                  | 8.8653   | 0.0017594  | 1394456_at   | NA                   | 11.9004 | 0.00000014 |
| 1374815_at   | "Stard3nl"             | "17.5289"  | "0.00000001" | 1367736_at   | Rraga                | -8.8599  | 0.00177532 | 1373265_at   | NA                   | 11.9186 | 0.00000014 |
| 1370448_at   | "Gpc2"                 | "17.5112"  | "0.00000001" | 1392770_at   | Neo1                 | 8.8319   | 0.00186033 | 1392316_at   | Ptprg                | 11.9026 | 0.00000014 |

|              |                        |            |              |              |                      |         |            |              |                      |         |            |
|--------------|------------------------|------------|--------------|--------------|----------------------|---------|------------|--------------|----------------------|---------|------------|
| 1368550_at   | "Foxq1"                | "-17.4803" | "0.00000001" | 1385109_at   | Josd3                | -8.8283 | 0.00187136 | 1373965_at   | RGD1310931_predicted | -11.884 | 0.00000014 |
| 1375874_at   | "RGD1309759_predicted" | "-17.4612" | "0.00000001" | 1369630_at   | Adk                  | 8.8283  | 0.00187143 | 1391608_at   | RGD1565449_predicted | 11.8761 | 0.00000014 |
| 1391458_at   | "Ndrgr1"               | "17.4257"  | "0.00000001" | 1390502_at   | RGD1309104_predicted | 8.7794  | 0.00203102 | 1390267_at   | Fars2                | 11.8129 | 0.00000015 |
| 1367888_at   | "Pcdh21"               | "17.3074"  | "0.00000002" | 1390987_at   | RGD1565283_predicted | 8.7788  | 0.00203325 | 1390217_at   | Garnl1               | 11.8235 | 0.00000015 |
| 1372641_at   | "Alpk3_predicted"      | "-17.2981" | "0.00000002" | 1368117_at   | Gphn                 | 8.7721  | 0.00205611 | 1379242_at   | LOC684996            | -11.83  | 0.00000015 |
| 1395750_at   | NA                     | "-17.2707" | "0.00000002" | 1389556_at   | Kifap3_predicted     | 8.7374  | 0.00217958 | 1373477_at   | Mrpl19               | -11.765 | 0.00000015 |
| 1393777_at   | NA                     | "17.2669"  | "0.00000002" | 1389009_at   | Rsrc1                | 8.7307  | 0.00220436 | 1383702_at   | NA                   | -11.771 | 0.00000015 |
| 1377660_at   | "RGD1309350_predicted" | "-17.2277" | "0.00000002" | 1392818_at   | Gas5                 | -8.7226 | 0.00223435 | 1377603_at   | Snx24                | 11.7631 | 0.00000015 |
| 1379909_at   | "Gkap1"                | "17.0947"  | "0.00000002" | 1368980_at   | Plce1                | 8.7093  | 0.00228494 | 1370905_at   | Dock9                | 11.7041 | 0.00000016 |
| 1398270_at   | "Bmp2"                 | "-17.0696" | "0.00000002" | 1376690_at   | Surb7_predicted      | -8.7027 | 0.00231079 | 1375562_at   | NA                   | 11.6945 | 0.00000016 |
| 1383584_at   | "Vmd2l1_predicted"     | "-17.0525" | "0.00000002" | 1367671_at   | Pcna                 | -8.6952 | 0.00234023 | 1394577_at   | NA                   | 11.7174 | 0.00000016 |
| 1379108_at   | "RGD1559968_predicted" | "17.0455"  | "0.00000002" | 1383278_at   | Centg2_predicted     | 8.6893  | 0.0023636  | 1376060_at   | NA                   | 11.7318 | 0.00000016 |
| 1372714_at   | "RGD1307778"           | "-17.0385" | "0.00000002" | 1373145_at   | RGD1560511_predicted | 8.6795  | 0.00240293 | 1372882_at   | RGD1308635_predicted | -11.722 | 0.00000016 |
| 1373169_at   | "Apat5_predicted"      | "-17.0333" | "0.00000002" | 1388611_at   | Tcea3                | 8.678   | 0.00240913 | 1398965_at   | LOC501069            | 11.6341 | 0.00000017 |
| 1381968_at   | "Creg_predicted"       | "-17.0286" | "0.00000002" | 1376337_at   | Smarca2              | 8.6726  | 0.00243115 | 1374593_at   | Prkce                | 11.6439 | 0.00000017 |
| 1370531_a_at | "Pld1"                 | "16.9763"  | "0.00000002" | 1396834_at   | Braf                 | -8.6642 | 0.0024658  | 1389226_at   | Stag1_predicted      | 11.6592 | 0.00000017 |
| 1370943_at   | "Sult1c2"              | "16.9656"  | "0.00000002" | 1377603_at   | Snx24                | 8.6476  | 0.00253595 | 1379578_at   | Zbtb20_predicted     | 11.6757 | 0.00000017 |
| 1373483_at   | "Ankr47_predicted"     | "-16.9047" | "0.00000002" | 1372255_at   | Rars_predicted       | -8.6218 | 0.00264923 | 1373411_at   | Eif1b_predicted      | -11.579 | 0.00000018 |
| 1372308_at   | NA                     | "16.8900"  | "0.00000002" | 1373285_at   | NA                   | 8.5861  | 0.00281489 | 1398922_at   | NA                   | 11.5961 | 0.00000018 |
| 1379546_at   | NA                     | "16.8862"  | "0.00000002" | 1369680_at   | Slc2a13              | 8.5843  | 0.0028235  | 1374764_at   | RGD1305605_predicted | -11.578 | 0.00000018 |
| 1371470_at   | "Adh4"                 | "16.8824"  | "0.00000002" | 1377926_at   | Centg2_predicted     | 8.5834  | 0.00282822 | 1369995_at   | Faf1                 | 11.5546 | 0.00000019 |
| 1367501_at   | "LOC498351"            | "-16.8190" | "0.00000003" | 1396076_at   | NA                   | 8.5814  | 0.00283759 | 1398371_at   | RGD1304751           | 11.5533 | 0.00000019 |
| 1375523_at   | "Marcks"               | "-16.8107" | "0.00000003" | 1390648_at   | Herc2_predicted      | 8.567   | 0.00290828 | 1388408_at   | RGD1307129           | -11.527 | 0.00000019 |
| 1377761_at   | "Gfpt2"                | "-16.7853" | "0.00000003" | 1392498_at   | LOC691318            | 8.5586  | 0.00294985 | 1374034_at   | Cars_predicted       | -11.48  | 0.0000002  |
| 1370529_a_at | "Pld1"                 | "16.7302"  | "0.00000003" | 1377254_a_at | Cohh1_predicted      | 8.5142  | 0.00318236 | 1370684_s_at | LOC501546            | 11.5117 | 0.0000002  |
| 1374300_at   | "Entpd4_predicted"     | "-16.6658" | "0.00000003" | 1382441_at   | Arid1b               | 8.5138  | 0.00318448 | 1383103_at   | LOC680620            | 11.4663 | 0.0000002  |
| 1371922_at   | NA                     | "16.6608"  | "0.00000003" | 1375358_at   | NA                   | 8.4995  | 0.00326343 | 1384163_at   | NA                   | -11.511 | 0.0000002  |
| 1370313_at   | "Acot7"                | "16.6462"  | "0.00000003" | 1390692_at   | Ctps_predicted       | -8.4818 | 0.00336352 | 1371427_at   | RGD1306911_predicted | -11.47  | 0.0000002  |
| 1392993_at   | NA                     | "16.5837"  | "0.00000003" | 1368279_at   | Mlit3                | 8.4715  | 0.00342372 | 1371478_at   | RGD1307752           | -11.458 | 0.0000002  |
| 1383447_at   | "Etv5_predicted"       | "16.5684"  | "0.00000003" | 1371718_at   | Sra1                 | -8.4505 | 0.00354947 | 1377674_at   | RGD1560612_predicted | 11.5155 | 0.0000002  |
| 1367805_at   | "Gls"                  | "16.5672"  | "0.00000003" | 1375995_at   | RGD1304592_predicted | 8.4398  | 0.00361492 | 1396144_at   | RGD1561817_predicted | 11.4912 | 0.0000002  |
| 1392274_at   | "Pdgfc"                | "16.5530"  | "0.00000004" | 1370503_s_at | Epb4.1l3             | 8.4345  | 0.0036485  | 1374599_at   | Herc1_predicted      | 11.4417 | 0.00000021 |
| 1369186_at   | "Casp1"                | "16.5244"  | "0.00000004" | 1389587_at   | Umps                 | -8.4296 | 0.0036792  | 1374857_at   | LOC499709            | -11.405 | 0.00000021 |
| 1386922_at   | "Ca2"                  | "16.4821"  | "0.00000004" | 1372059_at   | RGD1309437           | 8.4276  | 0.00369175 | 1394448_at   | NA                   | 11.4437 | 0.00000021 |
| 1387867_at   | "Aldh9a1"              | "16.4027"  | "0.00000004" | 1371520_at   | Znf291               | 8.4065  | 0.00382863 | 1376686_at   | Tmtc2_predicted      | 11.4329 | 0.00000021 |
| 1368528_at   | "Mic2l1"               | "16.3957"  | "0.00000004" | 1394940_at   | RGD1311381_predicted | -8.4035 | 0.00384831 | 1370893_at   | Acaca                | 11.341  | 0.00000022 |
| 1377672_at   | "Sult1c2"              | "16.2987"  | "0.00000005" | 1388953_at   | Gnl3                 | -8.3918 | 0.00392707 | 1388643_at   | Fut8                 | 11.3635 | 0.00000022 |
| 1380425_at   | "Rnasel"               | "16.2715"  | "0.00000005" | 1368371_at   | Kcnq1                | 8.3339  | 0.0043405  | 1399000_at   | LOC291411            | 11.3492 | 0.00000022 |
| 1374586_at   | "LOC689079"            | "16.2525"  | "0.00000005" | 1376619_at   | RGD1561090_predicted | 8.2859  | 0.00471686 | 1382500_at   | NA                   | -11.399 | 0.00000022 |
| 1373968_at   | "RGD1561940_predicted" | "16.2377"  | "0.00000005" | 1390423_at   | Phr1_predicted       | 8.2703  | 0.00484675 | 1372642_at   | NA                   | -11.375 | 0.00000022 |
| 1384201_at   | "Cs"                   | "-16.2113" | "0.00000005" | 1367719_at   | Dd5                  | 8.2698  | 0.00485144 | 1389613_at   | NA                   | 11.3693 | 0.00000022 |
| 1372449_at   | NA                     | "16.2025"  | "0.00000005" | 1372833_at   | NA                   | 8.26    | 0.00493461 | 1370318_at   | Pik4ca               | 11.353  | 0.00000022 |
| 1387263_at   | "Plkr"                 | "16.1808"  | "0.00000005" | 1390267_at   | Fars2                | 8.2594  | 0.00494024 | 1372066_at   | RGD1310022           | -11.355 | 0.00000022 |
| 1388102_at   | "Ltb4dh"               | "16.1749"  | "0.00000005" | 1389167_at   | Mapkap1              | 8.2566  | 0.00496408 | 1390492_a_at | Usp40                | 11.3601 | 0.00000022 |
| 1368608_at   | "Cyp2f4"               | "-16.1523" | "0.00000005" | 1373030_at   | NA                   | -8.2524 | 0.00500018 | 1371484_at   | LOC690349            | -11.321 | 0.00000023 |
| 1372911_at   | NA                     | "16.1502"  | "0.00000005" | 1371498_at   | MGC125271            | -8.2468 | 0.00504961 | 1383102_at   | NA                   | 11.3094 | 0.00000023 |
| 1374687_at   | NA                     | "16.0934"  | "0.00000006" | 1370153_at   | Gdf15                | -8.2435 | 0.00507893 | 1387911_at   | Rabggtb              | -11.33  | 0.00000023 |
| 1398431_at   | "Car8"                 | "16.0500"  | "0.00000006" | 1391445_at   | NA                   | -8.214  | 0.00534736 | 1376062_at   | Sdc1                 | -11.283 | 0.00000023 |
| 1387878_at   | "Glud1"                | "16.0460"  | "0.00000006" | 1388646_at   | RGD1311784_predicted | 8.2028  | 0.0054526  | 1390709_at   | Trio                 | 11.2841 | 0.00000023 |
| 1372443_at   | "Lrp11_predicted"      | "16.0227"  | "0.00000006" | 1367456_at   | Ube2d3               | -8.1996 | 0.00548312 | 1372218_at   | Wdr12                | -11.308 | 0.00000023 |

|              |                        |             |              |              |                      |         |            |              |                      |         |            |
|--------------|------------------------|-------------|--------------|--------------|----------------------|---------|------------|--------------|----------------------|---------|------------|
| 1394259_at   | "Cldn15_predicted"     | " 15.9837"  | "0.00000007" | 1391411_at   | RGD1560248_predicted | 8.1936  | 0.00554166 | 1377254_a_at | Cohh1_predicted      | 11.2656 | 0.00000024 |
| 1390884_a_at | "B3gn7"                | " -15.9798" | "0.00000007" | 1389562_at   | NA                   | 8.1851  | 0.0056245  | 1381905_at   | Herpud1              | 11.246  | 0.00000024 |
| 1369770_at   | "Sstr1"                | " -15.9428" | "0.00000007" | 1368123_at   | Igf1r                | 8.1819  | 0.00565642 | 1384427_at   | Mdm2_predicted       | -11.235 | 0.00000024 |
| 1388511_at   | "Centd2"               | " 15.9301"  | "0.00000007" | 1378492_at   | Farp1_predicted      | 8.1808  | 0.00566705 | 1382144_at   | Mrpl47               | -11.243 | 0.00000024 |
| 1367733_at   | "Ca2"                  | " 15.9066"  | "0.00000007" | 1389301_at   | LOC686892            | 8.169   | 0.0057853  | 1391460_at   | NA                   | 11.2546 | 0.00000024 |
| 1370072_at   | "Mme"                  | " -15.8711" | "0.00000007" | 1394849_at   | Zbtb20_predicted     | 8.1689  | 0.00578692 | 1381612_at   | NA                   | 11.2624 | 0.00000024 |
| 1392900_at   | "LOC691149"            | " -15.8637" | "0.00000007" | 1372863_at   | Phr1_predicted       | 8.1625  | 0.00585161 | 1372941_at   | Pdrg1                | -11.226 | 0.00000024 |
| 1367712_at   | "Timp1"                | " -15.8560" | "0.00000007" | 1395704_at   | NA                   | 8.1624  | 0.0058531  | 1383805_at   | RGD1561817_predicted | 11.2605 | 0.00000024 |
| 1394313_at   | "Tnfrsf11a_predicted"  | " 15.8408"  | "0.00000008" | 1388167_at   | Nfib                 | 8.1621  | 0.00585583 | 1399004_at   | LOC679572            | -11.207 | 0.00000025 |
| 1367900_at   | "Gyg1"                 | " 15.8374"  | "0.00000008" | 1376465_at   | RGD1563869_predicted | 8.1615  | 0.00586209 | 1391445_at   | NA                   | -11.201 | 0.00000025 |
| 1374043_at   | "Gramd3"               | " 15.8247"  | "0.00000008" | 1389226_at   | Stag1_predicted      | 8.1603  | 0.00587486 | 1384463_at   | NA                   | 11.2005 | 0.00000025 |
| 1390386_at   | "Casp3"                | " 15.8006"  | "0.00000008" | 1374225_at   | LOC500700            | 8.1524  | 0.00595623 | 1367518_at   | NA                   | 11.2182 | 0.00000025 |
| 1396178_at   | "C1qtnf4_predicted"    | " 15.7941"  | "0.00000008" | 1371505_at   | Hnrpc                | -8.1498 | 0.00598432 | 1389033_at   | RGD1306917_predicted | -11.201 | 0.00000025 |
| 1373847_at   | "Tm4sf1_predicted"     | " -15.7792" | "0.00000008" | 1371963_at   | Pcca                 | 8.1492  | 0.0059896  | 1374806_at   | Sfn_predicted        | -11.152 | 0.00000026 |
| 1391841_at   | "Tpm1"                 | " -15.7640" | "0.00000008" | 1389287_at   | NA                   | 8.1424  | 0.00606242 | 1371512_at   | Bre                  | -11.096 | 0.00000027 |
| 1384177_at   | "Gramd3"               | " 15.7606"  | "0.00000008" | 1384280_at   | NA                   | 8.1399  | 0.00608875 | 1398955_at   | Cops8                | -11.13  | 0.00000027 |
| 1397278_at   | NA                     | " -15.7597" | "0.00000008" | 1374349_at   | Ctdspl_predicted     | 8.1381  | 0.00610853 | 1392818_at   | Gas5                 | -11.122 | 0.00000027 |
| 1387410_at   | "Nr4a2"                | " -15.7514" | "0.00000008" | 1368070_at   | Stx8                 | 8.1365  | 0.00612497 | 1385109_at   | Josd3                | -11.077 | 0.00000027 |
| 1388103_at   | "Tmem37"               | " -15.6919" | "0.00000009" | 1371402_at   | Atp6v1b2             | -8.1143 | 0.00636979 | 1394535_at   | Kif16b_predicted     | 11.1315 | 0.00000027 |
| 1387209_at   | "Lztr2"                | " 15.6892"  | "0.00000009" | 1391577_at   | Pgam5                | -8.0926 | 0.00661792 | 1379290_at   | LOC300963            | 11.0807 | 0.00000027 |
| 1371499_at   | "Cd9"                  | " -15.6641" | "0.00000009" | 1388403_at   | LOC361596            | 8.0923  | 0.00662087 | 1371485_at   | NA                   | 11.0995 | 0.00000027 |
| 1367673_at   | "Selenbp1"             | " 15.6446"  | "0.00000009" | 1388645_at   | RGD1307982           | 8.0883  | 0.00666808 | 1390965_at   | NA                   | 11.1074 | 0.00000027 |
| 1395373_at   | NA                     | " 15.6306"  | "0.00000010" | 1379396_at   | Elmo1_predicted      | 8.0831  | 0.00672955 | 1379445_at   | NA                   | 11.1188 | 0.00000027 |
| 1369073_at   | "Nr1h4"                | " 15.5739"  | "0.00000010" | 1374886_at   | Bcs1l                | -8.0806 | 0.00675858 | 1388622_at   | Nol5a                | -11.125 | 0.00000027 |
| 1370949_at   | "Marcks"               | " -15.5682" | "0.00000010" | 1389566_at   | Ccnb2                | 8.0775  | 0.00679677 | 1383115_at   | Prkg1                | -11.131 | 0.00000027 |
| 1382387_at   | "Tmem16a_predicted"    | " -15.5623" | "0.00000010" | 1386586_at   | MGC125015            | -8.0756 | 0.00681861 | 1374253_at   | RGD1307235_predicted | 11.0954 | 0.00000027 |
| 1374771_at   | NA                     | " 15.5387"  | "0.00000011" | 1380527_at   | Pde7b                | 8.0665  | 0.00692909 | 1394786_at   | Sorl1_predicted      | 11.1354 | 0.00000027 |
| 1393840_at   | "Gnat2_predicted"      | " -15.5028" | "0.00000011" | 1376868_at   | Cobll1_predicted     | 8.058   | 0.00703496 | 1370807_at   | Tmem49               | -11.084 | 0.00000027 |
| 1375823_at   | "Slc4a4"               | " 15.4803"  | "0.00000011" | 1390189_at   | LOC298977            | 8.0523  | 0.00710625 | 1388394_at   | Aars                 | -11.07  | 0.00000028 |
| 1368180_s_at | "Gsta2"                | " -15.4401" | "0.00000012" | 1385043_at   | RGD1565362_predicted | 8.0382  | 0.0072847  | 1377926_at   | Centg2_predicted     | 11.0389 | 0.00000028 |
| 1398445_at   | NA                     | " 15.4378"  | "0.00000012" | 1371828_at   | RGD1310861           | -8.0362 | 0.00731146 | 1376683_at   | NA                   | 11.0602 | 0.00000028 |
| 1373248_at   | "RGD1565800_predicted" | " -15.4185" | "0.00000012" | 1391046_at   | LOC498295            | 8.0352  | 0.00732455 | 1389862_at   | RGD1305327           | -11.054 | 0.00000028 |
| 1371996_at   | "Aebp2_predicted"      | " -15.4030" | "0.00000012" | 1379832_at   | Polr2d_predicted     | -8.0343 | 0.00733634 | 1373017_at   | Sucig2               | 11.0578 | 0.00000028 |
| 1373078_at   | "RGD1564895_predicted" | " 15.3668"  | "0.00000013" | 1371818_at   | NA                   | -8.0303 | 0.00738784 | 1368019_at   | Frap1                | 11.0192 | 0.00000029 |
| 1378889_at   | NA                     | " 15.3507"  | "0.00000013" | 1382001_at   | LOC502710            | 8.0278  | 0.0074214  | 1374494_at   | NA                   | 11.0309 | 0.00000029 |
| 1368447_x_at | "Spink1"               | " -15.3322" | "0.00000014" | 1379352_at   | Pip5k1a              | 8.0229  | 0.00748573 | 1374424_at   | Prmt5_predicted      | -10.999 | 0.00000029 |
| 1376973_at   | "Sdcbp2"               | " 15.2886"  | "0.00000014" | 1391607_at   | RGD1566319_predicted | -8.013  | 0.00761799 | 1390579_at   | RGD1305222_predicted | -11.021 | 0.00000029 |
| 1388300_at   | "Mgst3_predicted"      | " 15.2800"  | "0.00000014" | 1368650_at   | Klf10                | -7.9823 | 0.00804517 | 1389102_at   | RGD1566072_predicted | 11.0018 | 0.00000029 |
| 1373432_at   | "Marcks"               | " -15.2788" | "0.00000014" | 1386916_at   | Aco1                 | 7.9741  | 0.00816274 | 1376065_at   | Rrs1_predicted       | -11.005 | 0.00000029 |
| 1391125_at   | NA                     | " -15.2176" | "0.00000015" | 1373870_at   | RGD1305486           | -7.9696 | 0.00822937 | 1390040_at   | Bre                  | 10.9738 | 0.0000003  |
| 1384668_at   | NA                     | " -15.2159" | "0.00000015" | 1388710_at   | Rreb1_predicted      | 7.9651  | 0.0082957  | 1384076_at   | Cachd1_predicted     | 10.9412 | 0.0000003  |
| 1370813_at   | "Gstm5"                | " -15.1884" | "0.00000016" | 1377653_at   | LOC366669            | 7.9645  | 0.00830363 | 1372225_at   | Cap350               | 10.9494 | 0.0000003  |
| 1368905_at   | "Ces2"                 | " 15.1786"  | "0.00000016" | 1367518_at   | NA                   | 7.9624  | 0.00833554 | 1369976_at   | Dynll1               | -10.945 | 0.0000003  |
| 1389580_at   | "Smarca3_predicted"    | " 15.1785"  | "0.00000016" | 1395203_at   | NA                   | 7.9512  | 0.00850239 | 1374777_at   | LOC502894            | -10.956 | 0.0000003  |
| 1399040_at   | "Gba2"                 | " -15.1387" | "0.00000017" | 1388546_at   | Ablim1_predicted     | 7.9492  | 0.00853295 | 1382084_at   | LOC682100            | 10.9803 | 0.0000003  |
| 1390187_at   | NA                     | " -15.1004" | "0.00000018" | 1371202_a_at | Nfib                 | 7.9299  | 0.0088329  | 1375452_at   | Mgea6_predicted      | 10.9902 | 0.0000003  |
| 1388440_at   | "Aph1b"                | " -15.0896" | "0.00000018" | 1370330_at   | Sipa111              | 7.9278  | 0.00886542 | 1377208_at   | NA                   | 10.9757 | 0.0000003  |
| 1389587_at   | "Umps"                 | " -15.0739" | "0.00000018" | 1393478_at   | NA                   | 7.918   | 0.00902244 | 1383166_at   | Ncoa1_predicted      | 10.9636 | 0.0000003  |
| 1380186_at   | NA                     | " -15.0621" | "0.00000018" | 1386882_at   | Tctex1               | -7.9135 | 0.009094   | 1368173_at   | Nol5                 | -10.967 | 0.0000003  |
| 1390031_at   | "RGD1311873"           | " -15.0288" | "0.00000019" | 1368225_at   | Exoc2                | 7.9068  | 0.00920359 | 1370177_at   | PVR                  | -10.953 | 0.0000003  |

|              |                        |            |              |              |                      |         |            |              |                      |         |            |
|--------------|------------------------|------------|--------------|--------------|----------------------|---------|------------|--------------|----------------------|---------|------------|
| 1383542_at   | NA                     | "-15.0151" | "0.00000019" | 1389608_at   | Abcf2_predicted      | -7.8959 | 0.00938512 | 1398919_at   | RGD1304704           | -10.95  | 0.0000003  |
| 1391005_at   | "Fbxl4_predicted"      | "14.9689"  | "0.00000021" | 1390492_a_at | Usp40                | 7.8955  | 0.00939186 | 1392452_at   | RGD1563764_predicted | 10.9307 | 0.0000003  |
| 1371089_at   | "Yc2"                  | "14.9663"  | "0.00000021" | 1370294_a_at | Cdc20                | 7.8936  | 0.00942472 | 1374824_at   | Rpl37                | 10.9548 | 0.0000003  |
| 1370467_at   | "Slc13a1"              | "14.9661"  | "0.00000021" | 1369679_a_at | Nfia                 | 7.8807  | 0.00964402 | 1376067_at   | Cnot2                | 10.8937 | 0.00000031 |
| 1374610_at   | NA                     | "14.9654"  | "0.00000021" | 1372739_at   | Tspan31              | -7.8723 | 0.00979029 | 1395139_at   | Kif16b_predicted     | 10.9129 | 0.00000031 |
| 1369407_at   | "Tnfrsf11b"            | "-14.9425" | "0.00000021" | 1377263_at   | Havcr2               | -7.8662 | 0.00989843 | 1381871_at   | LOC500261            | 10.9266 | 0.00000031 |
| 1391532_at   | "Rap2ip"               | "14.9397"  | "0.00000021" | 1397748_at   | NA                   | -7.8635 | 0.0099462  | 1390240_at   | NA                   | 10.8928 | 0.00000031 |
| 1369179_a_at | "Pparg"                | "14.9129"  | "0.00000022" | 1388816_at   | Dlgh1                | 7.8267  | 0.01062539 | 1383795_at   | NA                   | 10.9073 | 0.00000031 |
| 1385107_at   | "Slc6a14"              | "-14.8582" | "0.00000023" | 1377674_at   | RGD1560612_predicted | 7.8203  | 0.01074857 | 1388352_at   | Nat5_predicted       | -10.894 | 0.00000031 |
| 1370881_at   | "Tst"                  | "14.8543"  | "0.00000023" | 1370474_at   | Thrb                 | 7.8174  | 0.01080618 | 1398961_at   | Pfn2                 | 10.9091 | 0.00000031 |
| 1368219_at   | "Clcn2"                | "14.8090"  | "0.00000025" | 1395613_at   | Pard3                | 7.7933  | 0.01128419 | 1374651_at   | Dopey2_predicted     | 10.8669 | 0.00000032 |
| 1386940_at   | "Timp2"                | "-14.7843" | "0.00000026" | 1372218_at   | Wdr12                | -7.7872 | 0.01141035 | 1373038_at   | Milt10               | 10.8599 | 0.00000032 |
| 1387942_at   | "Slc35e4"              | "14.7805"  | "0.00000026" | 1373191_at   | Rab34                | 7.7691  | 0.01178764 | 1377703_at   | Pip5k1a              | -10.883 | 0.00000032 |
| 1384101_at   | "LOC682507"            | "-14.7717" | "0.00000026" | 1374078_at   | RGD1560612_predicted | 7.7459  | 0.01229226 | 1374945_at   | RGD1359191           | -10.852 | 0.00000032 |
| 1373842_at   | "LOC682507"            | "-14.7658" | "0.00000026" | 1393713_at   | Gmcs                 | 7.7389  | 0.01244959 | 1374743_at   | RGD1565362_predicted | 10.8517 | 0.00000032 |
| 1370252_at   | "Avpi1"                | "-14.7370" | "0.00000027" | 1374599_at   | Herc1_predicted      | 7.7358  | 0.01252027 | 1373377_at   | Scnm1_predicted      | -10.879 | 0.00000032 |
| 1386945_a_at | "Prkab1"               | "14.7279"  | "0.00000027" | 1376715_at   | Cbara1               | 7.7264  | 0.0127345  | 1388816_at   | Dlgh1                | 10.8378 | 0.00000033 |
| 1391345_at   | "Bmper_predicted"      | "14.7215"  | "0.00000027" | 1383926_at   | Bub1b                | 7.7218  | 0.01284074 | 1379719_at   | NA                   | 10.8251 | 0.00000033 |
| 1397268_at   | "LOC679784"            | "14.6892"  | "0.00000029" | 1390237_at   | Timm8a               | -7.7181 | 0.01292701 | 1380483_at   | Pde8b                | 10.8302 | 0.00000033 |
| 1389759_at   | "Celsr1"               | "-14.6617" | "0.00000029" | 1384076_at   | Cachd1_predicted     | 7.7127  | 0.01305474 | 1373271_at   | RGD1563971_predicted | -10.82  | 0.00000033 |
| 1384002_at   | "LOC361929"            | "14.6355"  | "0.00000030" | 1390022_at   | Arpc5                | -7.7068 | 0.01319499 | 1398837_at   | Tceb2                | -10.839 | 0.00000033 |
| 1377653_at   | "LOC366669"            | "14.6227"  | "0.00000031" | 1393230_s_at | RGD1308772_predicted | 7.6927  | 0.01353663 | 1378248_at   | RGD1562438_predicted | 10.7997 | 0.00000034 |
| 1374590_at   | "LOC680128"            | "14.6165"  | "0.00000031" | 1389137_at   | Cit                  | 7.6808  | 0.01383456 | 1389301_at   | LOC686892            | 10.7526 | 0.00000035 |
| 1387206_at   | "B4galt6"              | "14.5942"  | "0.00000032" | 1387127_at   | Atrn                 | 7.6755  | 0.01396831 | 1383485_at   | Mdm2_predicted       | -10.755 | 0.00000035 |
| 1383437_at   | "RGD1562478_predicted" | "14.5800"  | "0.00000032" | 1369629_at   | Adk                  | 7.6277  | 0.01523833 | 1383744_at   | NA                   | -10.785 | 0.00000035 |
| 1393793_at   | NA                     | "14.5551"  | "0.00000033" | 1372929_at   | Kcnma1               | 7.6197  | 0.0154638  | 1390480_at   | NA                   | 10.7528 | 0.00000035 |
| 1395991_at   | "Rimbp2"               | "14.5402"  | "0.00000034" | 1368031_at   | Nolc1                | -7.6091 | 0.01576433 | 1374652_at   | NA                   | 10.7534 | 0.00000035 |
| 1367738_at   | "Unc119"               | "-14.5229" | "0.00000035" | 1389256_at   | NA                   | 7.6004  | 0.01601711 | 1374715_at   | RGD1309487           | 10.7684 | 0.00000035 |
| 1384288_at   | NA                     | "14.5130"  | "0.00000035" | 1388643_at   | Fut8                 | 7.5925  | 0.01625151 | 1397781_at   | RGD1565498_predicted | 10.7754 | 0.00000035 |
| 1387178_a_at | "Cbs"                  | "14.5042"  | "0.00000036" | 1389908_at   | NA                   | 7.5834  | 0.01652276 | 1373283_at   | Slc25a3              | -10.786 | 0.00000035 |
| 1375884_at   | "MGC105560"            | "-14.4666" | "0.00000037" | 1368064_a_at | Ddc                  | 7.5815  | 0.01658103 | 1392481_at   | RGD1560909_predicted | -10.736 | 0.00000036 |
| 1383991_at   | "RGD1562754_predicted" | "-14.4650" | "0.00000037" | 1374042_at   | RGD1310453_predicted | 7.5797  | 0.01663673 | 1386866_at   | Ywhag                | -10.748 | 0.00000036 |
| 1369967_at   | "Cs"                   | "-14.4592" | "0.00000038" | 1383256_at   | Dnrtip2_predicted    | -7.5722 | 0.01686765 | 1372601_at   | Atf5                 | -10.719 | 0.00000037 |
| 1381163_at   | NA                     | "14.4550"  | "0.00000038" | 1371999_at   | NA                   | -7.5706 | 0.01691478 | 1387753_s_at | Magi3                | 10.7215 | 0.00000037 |
| 1371363_at   | "Gpd1"                 | "-14.4409" | "0.00000038" | 1375888_at   | LOC691036            | 7.552   | 0.01750255 | 1391980_at   | LOC360990            | 10.6951 | 0.00000038 |
| 1394077_at   | "Rnd3"                 | "-14.4351" | "0.00000039" | 1398981_at   | LOC691278            | -7.5416 | 0.01783912 | 1383910_at   | NA                   | 10.6919 | 0.00000038 |
| 1396207_at   | "Rdx"                  | "-14.4296" | "0.00000039" | 1370345_at   | Ccnb1                | 7.5399  | 0.01789565 | 1374874_at   | RGD1561042_predicted | 10.6945 | 0.00000038 |
| 1370399_at   | "Cyp4b1"               | "14.4061"  | "0.00000040" | 1390026_at   | Bag3                 | -7.5321 | 0.0181543  | 1375186_at   | LOC680594            | -10.674 | 0.00000039 |
| 1388615_at   | "Rap1a"                | "-14.3944" | "0.00000041" | 1393033_at   | Yars2                | -7.5302 | 0.01821622 | 1389150_at   | NA                   | 10.6696 | 0.00000039 |
| 1388368_at   | "Med28_predicted"      | "-14.3559" | "0.00000043" | 1398771_at   | Slc3a2               | -7.5201 | 0.01855893 | 1371719_at   | Brd2                 | -10.64  | 0.0000004  |
| 1368711_at   | "Foxa2"                | "-14.3475" | "0.00000043" | 1376060_at   | NA                   | 7.5075  | 0.0189944  | 1393585_at   | NA                   | 10.6455 | 0.0000004  |
| 1384503_at   | "Klk8"                 | "14.3302"  | "0.00000044" | 1370188_at   | Sfrs10               | -7.493  | 0.01950739 | 1367483_at   | RGD1309148_predicted | -10.636 | 0.0000004  |
| 1372229_at   | "Pdk3"                 | "14.2966"  | "0.00000046" | 1388584_at   | NA                   | -7.4924 | 0.01952988 | 1376273_at   | Rnasen               | 10.6437 | 0.0000004  |
| 1373374_at   | "Lmo4"                 | "-14.2913" | "0.00000046" | 1368476_at   | Nr3c2                | 7.4895  | 0.01963648 | 1374621_at   | Taf1c_predicted      | -10.64  | 0.0000004  |
| 1369100_at   | "Nalp6"                | "14.2751"  | "0.00000047" | 1382126_at   | Ncor1                | 7.4846  | 0.01981237 | 1389608_at   | Abcf2_predicted      | -10.611 | 0.00000041 |
| 1383061_at   | NA                     | "-14.2747" | "0.00000047" | 1391608_at   | RGD1565449_predicted | 7.4826  | 0.01988618 | 1391280_at   | H13_predicted        | -10.623 | 0.00000041 |
| 1376709_at   | "Slc39a8"              | "14.2677"  | "0.00000047" | 1372479_at   | NA                   | 7.4705  | 0.02033579 | 1383074_at   | Man2a1               | 10.6084 | 0.00000041 |
| 1367680_at   | "Acox1"                | "14.2563"  | "0.00000048" | 1379386_at   | RGD1563164_predicted | -7.4699 | 0.0203578  | 1383770_at   | NA                   | 10.5885 | 0.00000041 |
| 1385338_at   | "LOC690559"            | "14.2377"  | "0.00000049" | 1386059_at   | RGD1562346_predicted | 7.4656  | 0.0205217  | 1374687_at   | NA                   | 10.6124 | 0.00000041 |
| 1389265_at   | "Gbe1"                 | "14.2157"  | "0.00000050" | 1385667_x_at | NA                   | 7.4626  | 0.02063278 | 1377656_at   | Rbm13                | -10.61  | 0.00000041 |

|              |                        |             |              |              |                      |         |            |              |                      |         |            |
|--------------|------------------------|-------------|--------------|--------------|----------------------|---------|------------|--------------|----------------------|---------|------------|
| 1372805_at   | "RGD1310444_predicted" | " 14.2000"  | "0.00000051" | 1399000_at   | LOC291411            | 7.4573  | 0.02083689 | 1381685_a_at | RGD1305773_predicted | 10.5941 | 0.00000041 |
| 1375990_a_at | NA                     | " 14.1584"  | "0.00000054" | 1367713_at   | Eif2s1               | -7.4543 | 0.02095233 | 1372043_at   | RGD1311709_predicted | -10.62  | 0.00000041 |
| 1383692_at   | "LOC681037"            | " 14.1428"  | "0.00000055" | 1390913_at   | NA                   | -7.4538 | 0.02097293 | 1374591_at   | RGD1561090_predicted | 10.6122 | 0.00000041 |
| 1369712_at   | "Stk3"                 | " 14.1273"  | "0.00000056" | 1372634_at   | Adprh12_predicted    | -7.4469 | 0.02124159 | 1392465_at   | Sap18                | -10.625 | 0.00000041 |
| 1385426_at   | "RGD1305326_predicted" | " -14.1256" | "0.00000056" | 1374638_at   | Pex13_predicted      | -7.4005 | 0.02314888 | 1375521_at   | Tceal8               | -10.586 | 0.00000041 |
| 1367496_at   | "Tm9sf2"               | " 14.0706"  | "0.00000060" | 1375823_at   | Slc4a4               | 7.3969  | 0.02330423 | 1379203_at   | Tcfdp2_predicted     | 10.5846 | 0.00000041 |
| 1369871_at   | "Areg"                 | " -14.0189" | "0.00000064" | 1377719_a_at | NA                   | 7.3926  | 0.02348843 | 1388038_at   | Atrn                 | 10.5704 | 0.00000042 |
| 1389113_at   | "Slc45a3_predicted"    | " -14.0028" | "0.00000065" | 1392968_at   | NA                   | 7.3911  | 0.02355705 | 1380891_at   | Gphn                 | 10.5781 | 0.00000042 |
| 1393990_at   | "Zfp503_predicted"     | " 13.9927"  | "0.00000066" | 1374857_at   | LOC499709            | -7.3749 | 0.02427549 | 1390648_at   | Herc2_predicted      | 10.561  | 0.00000042 |
| 1397589_at   | NA                     | " 13.9712"  | "0.00000068" | 1386866_at   | Ywhag                | -7.3728 | 0.0243718  | 1373870_at   | RGD1305486           | -10.567 | 0.00000042 |
| 1373754_at   | "LOC680692"            | " -13.9695" | "0.00000068" | 1371663_at   | RGD1305138_predicted | -7.3685 | 0.02456542 | 1381983_at   | RGD1307927_predicted | 10.5587 | 0.00000042 |
| 1368082_at   | "Slc4a2"               | " 13.9424"  | "0.00000070" | 1398342_at   | LOC501052            | -7.3579 | 0.02505255 | 1383626_at   | RGD1562173_predicted | -10.564 | 0.00000042 |
| 1386695_at   | NA                     | " 13.9246"  | "0.00000072" | 1388424_at   | EIF3s1_predicted     | -7.3552 | 0.02517922 | 1390178_at   | Srprb                | -10.562 | 0.00000042 |
| 1393760_at   | "LOC690654"            | " 13.9174"  | "0.00000073" | 1368268_at   | Tdg                  | -7.3531 | 0.02528063 | 1370976_at   | G3bp                 | -10.541 | 0.00000043 |
| 1372755_at   | "Mal2"                 | " 13.9011"  | "0.00000074" | 1370684_s_at | LOC501546            | 7.3497  | 0.02543937 | 1389388_at   | NA                   | 10.5476 | 0.00000043 |
| 1374440_at   | "Dhrs8"                | " 13.8370"  | "0.00000080" | 1375418_at   | Trrap_predicted      | 7.3257  | 0.02660622 | 1392770_at   | Neo1                 | 10.5378 | 0.00000043 |
| 1398664_at   | "Gramd3"               | " 13.8265"  | "0.00000081" | 1369979_at   | Scap2                | 7.3234  | 0.0267169  | 1370438_at   | Capon                | 10.5261 | 0.00000044 |
| 1387408_at   | "Siah2"                | " 13.7866"  | "0.00000085" | 1386466_at   | NA                   | -7.3218 | 0.02679638 | 1367808_at   | Timm8b               | -10.519 | 0.00000044 |
| 1382183_at   | NA                     | " 13.7758"  | "0.00000087" | 1378543_at   | Hnrpa2b1_predicted   | -7.3186 | 0.02695798 | 1373634_at   | NA                   | 10.4944 | 0.00000045 |
| 1368471_at   | "Guca2a"               | " 13.7395"  | "0.00000091" | 1398496_at   | NA                   | -7.3123 | 0.02727536 | 1378457_at   | NA                   | 10.4969 | 0.00000045 |
| 1368244_at   | "As3mt"                | " 13.7368"  | "0.00000091" | 1372066_at   | RGD1310022           | -7.3121 | 0.02728852 | 1383640_at   | NA                   | 10.507  | 0.00000045 |
| 1375428_at   | "Creg_predicted"       | " -13.7312" | "0.00000092" | 1368936_at   | Txn1                 | -7.3024 | 0.02778725 | 1388508_at   | RGD1561287_predicted | -10.497 | 0.00000045 |
| 1368540_at   | "Tpbp"                 | " -13.7291" | "0.00000092" | 1378153_at   | NA                   | 7.2981  | 0.02801164 | 1388819_at   | Scamp1               | 10.5009 | 0.00000045 |
| 1370202_at   | "Hrasls3"              | " -13.7172" | "0.00000093" | 1373272_at   | Plekha5              | 7.295   | 0.02817373 | 1371791_at   | Surf4                | -10.499 | 0.00000045 |
| 1375954_at   | "S100a13_predicted"    | " -13.6905" | "0.00000096" | 1376416_at   | RGD1309461           | 7.2912  | 0.02837584 | 1391169_at   | RGD1562562_predicted | 10.4765 | 0.00000046 |
| 1393582_at   | NA                     | " 13.6714"  | "0.00000099" | 1368889_at   | Vti1a                | 7.2879  | 0.02854825 | 1392972_at   | Trio                 | 10.4721 | 0.00000046 |
| 1381994_at   | "Aebp2_predicted"      | " -13.6678" | "0.00000099" | 1398976_at   | Ncor1                | 7.2873  | 0.02858165 | 1371868_at   | Bcas2_predicted      | -10.444 | 0.00000047 |
| 1376589_at   | "LOC683708"            | " 13.6531"  | "0.00000101" | 1375974_at   | NA                   | -7.2766 | 0.02916159 | 1372651_at   | Cdw92                | 10.4441 | 0.00000047 |
| 1369536_at   | "Edn2"                 | " 13.6457"  | "0.00000102" | 1396831_at   | Glrp1_predicted      | 7.2674  | 0.02966831 | 1373719_at   | Map4k3               | 10.4466 | 0.00000047 |
| 1386908_at   | "Glr1"                 | " 13.6410"  | "0.00000103" | 1373924_at   | RGD1306568           | 7.2511  | 0.03058967 | 1371498_at   | MGC125271            | -10.45  | 0.00000047 |
| 1373215_at   | "Abr_predicted"        | " 13.6140"  | "0.00000106" | 1395488_at   | Msh3                 | 7.2456  | 0.03090556 | 1388825_at   | NA                   | 10.4208 | 0.00000048 |
| 1380360_at   | "Oma1_predicted"       | " 13.6132"  | "0.00000106" | 1383146_at   | RGD1562629_predicted | 7.2367  | 0.0314258  | 1389562_at   | NA                   | 10.4356 | 0.00000048 |
| 1367957_at   | "Rgs3"                 | " -13.6030" | "0.00000108" | 1373377_at   | Scnm1_predicted      | -7.2326 | 0.03166956 | 1389180_at   | NA                   | 10.4376 | 0.00000048 |
| 1368945_at   | "Bmp2"                 | " -13.5978" | "0.00000108" | 1370190_at   | H3f3b                | -7.2312 | 0.03175393 | 1377011_at   | RGD1307034_predicted | 10.4273 | 0.00000048 |
| 1392374_at   | "Ccmd2"                | " -13.5974" | "0.00000108" | 1375686_at   | Ppil3                | -7.2269 | 0.03200712 | 1371454_at   | Tmem93_predicted     | -10.42  | 0.00000048 |
| 1380465_at   | NA                     | " -13.5863" | "0.00000110" | 1378056_at   | Gmnn_predicted       | -7.2265 | 0.03203542 | 1397556_at   | Mak3_predicted       | -10.393 | 0.0000005  |
| 1373559_at   | NA                     | " -13.5688" | "0.00000112" | 1373017_at   | Suclg2               | 7.2226  | 0.03226788 | 1388667_at   | Man2a1               | 10.3888 | 0.0000005  |
| 1394451_at   | "Anxa1"                | " -13.5268" | "0.00000119" | 1379967_at   | Zfp367               | -7.2132 | 0.03284586 | 1380890_at   | RGD1307055_predicted | 10.3864 | 0.0000005  |
| 1379250_at   | "Galm"                 | " 13.4797"  | "0.00000126" | 1383253_at   | NA                   | -7.2118 | 0.03292926 | 1376240_at   | RGD1566399_predicted | 10.3683 | 0.00000051 |
| 1368512_a_at | "Enpep"                | " -13.4653" | "0.00000128" | 1372516_at   | Kif22                | 7.1893  | 0.03435728 | 1378685_at   | LOC689836            | 10.3343 | 0.00000053 |
| 1368163_at   | "Dpp4"                 | " -13.4536" | "0.00000130" | 1378943_at   | RGD1566072_predicted | 7.1774  | 0.03513432 | 1392492_at   | NA                   | 10.3344 | 0.00000053 |
| 1389320_at   | "LOC364637"            | " 13.4301"  | "0.00000134" | 1380890_at   | RGD1307055_predicted | 7.1666  | 0.03585875 | 1390475_at   | NA                   | 10.3389 | 0.00000053 |
| 1374189_at   | "Zfp219"               | " -13.4297" | "0.00000134" | 1383063_a_at | NA                   | 7.1593  | 0.0363537  | 1390132_at   | NA                   | 10.3393 | 0.00000053 |
| 1373047_at   | "Prkci"                | " 13.4228"  | "0.00000135" | 1373551_at   | RGD1309762_predicted | 7.1494  | 0.03703836 | 1387823_at   | Plrg1                | -10.348 | 0.00000053 |
| 1392694_at   | "RGD1562344_predicted" | " 13.4070"  | "0.00000138" | 1377837_at   | Znf183               | -7.1238 | 0.03888117 | 1389472_at   | RGD1311526_predicted | -10.337 | 0.00000053 |
| 1370870_at   | "Me1"                  | " 13.4054"  | "0.00000138" | 1377651_at   | Trio                 | 7.1123  | 0.03973128 | 1383231_at   | Snip1                | -10.327 | 0.00000053 |
| 1388678_at   | "Rnf138"               | " -13.3701" | "0.00000145" | 1373411_at   | Eif1b_predicted      | -7.11   | 0.03991038 | 1389128_at   | Wdfy3_predicted      | 10.3275 | 0.00000053 |
| 1384315_at   | "Pdk3"                 | " 13.3563"  | "0.00000147" | 1395132_at   | Utrn                 | 7.0907  | 0.04139618 | 1379832_at   | Polr2d_predicted     | -10.313 | 0.00000054 |
| 1372064_at   | "Cxcl16"               | " -13.3562" | "0.00000147" | 1376686_at   | Tmct2_predicted      | 7.0886  | 0.0415618  | 1388723_at   | Bre                  | 10.3058 | 0.00000055 |
| 1384039_at   | "RGD1310950_predicted" | " -13.3554" | "0.00000147" | 1398819_at   | Dnaja1               | -7.0802 | 0.04223249 | 1374078_at   | RGD1560612_predicted | 10.3044 | 0.00000055 |

|              |                        |             |              |            |                      |         |            |              |                      |         |            |
|--------------|------------------------|-------------|--------------|------------|----------------------|---------|------------|--------------|----------------------|---------|------------|
| 1372682_at   | "RGD1307218"           | " 13.3522"  | "0.00000148" | 1372619_at | Mrpl49               | -7.0793 | 0.04230166 | 1376562_at   | RGD1561817_predicted | 10.3041 | 0.00000055 |
| 1398980_at   | "Supt16h_predicted"    | " -13.3341" | "0.00000152" | 1368943_at | Rnase4               | -7.0792 | 0.04231227 | 1373696_at   | RGD1564859_predicted | 10.3004 | 0.00000055 |
| 1370195_at   | "Snap23"               | " -13.3216" | "0.00000154" | 1372498_at | Ciapin1              | -7.0779 | 0.04241245 | 1379971_at   | Zc3h6_predicted      | 10.2951 | 0.00000055 |
| 1367838_at   | "Cth"                  | " 13.3176"  | "0.00000155" | 1388990_at | Mki67ip              | -7.0759 | 0.04257359 | 1390818_at   | NA                   | 10.28   | 0.00000056 |
| 1386720_at   | "Tmprss8"              | " 13.3142"  | "0.00000155" | 1375562_at | NA                   | 7.0752  | 0.04263409 | 1384135_at   | NA                   | 10.2813 | 0.00000056 |
| 1377199_at   | NA                     | " 13.3127"  | "0.00000156" | 1390137_at | Traf4af1             | 7.0634  | 0.04359459 | 1382330_at   | Ddef2_predicted      | 10.2328 | 0.00000058 |
| 1370282_at   | "Csrp2"                | " 13.3111"  | "0.00000156" | 1372643_at | RGD1563977_predicted | 7.0621  | 0.04370663 | 1389450_at   | LOC368084            | -10.243 | 0.00000058 |
| 1384774_at   | "Tmprss8"              | " 13.3003"  | "0.00000158" | 1389265_at | Gbe1                 | 7.0596  | 0.04391724 | 1371608_at   | Mrps34_predicted     | -10.259 | 0.00000058 |
| 1373352_at   | "LOC685385"            | " -13.2827" | "0.00000162" | 1379668_at | RGD1564725_predicted | -7.0428 | 0.04534227 | 1398039_at   | NA                   | 10.2339 | 0.00000058 |
| 1370631_at   | "Reg3g"                | " 13.2826"  | "0.00000162" | 1389703_at | Zzef1_predicted      | 7.0415  | 0.04544968 | 1379363_at   | NA                   | 10.2369 | 0.00000058 |
| 1368007_at   | "Dmbt1"                | " 13.2804"  | "0.00000162" | 1383415_at | Ppp3ca               | 7.0413  | 0.04546667 | 1373941_at   | NA                   | 10.2376 | 0.00000058 |
| 1383188_at   | NA                     | " 13.2708"  | "0.00000164" | 1373632_at | Taf9                 | -7.0246 | 0.04693765 | 1391577_at   | Pgam5                | -10.236 | 0.00000058 |
| 1370071_at   | "Ada"                  | " -13.2690" | "0.00000165" | 1373036_at | RGD1561455_predicted | 7.0217  | 0.04720374 | 1377949_s_at | RGD1306359_predicted | 10.2517 | 0.00000058 |
| 1390026_at   | "Bag3"                 | " -13.2557" | "0.00000168" | 1390856_at | NA                   | 7.0176  | 0.04757011 | 1391880_at   | Tpd52_predicted      | 10.2386 | 0.00000058 |
| 1378505_at   | NA                     | " 13.2498"  | "0.00000169" | 1373898_at | LOC360760            | 7.0157  | 0.04774192 | 1389035_at   | Yipf3                | -10.251 | 0.00000058 |
| 1376924_a_at | "Palmd"                | " 13.2416"  | "0.00000171" | 1372821_at | RGD1565969_predicted | 7.0153  | 0.04778205 | 1383064_at   | NA                   | 10.2257 | 0.00000059 |
| 1389670_at   | "RGD1566402_predicted" | " 13.2035"  | "0.00000179" | 1379669_at | NA                   | 7.0152  | 0.04778726 | 1387018_at   | Argbp2               | 10.2098 | 0.0000006  |
| 1378739_at   | "LOC500292"            | " 13.1997"  | "0.00000180" | 1367972_at | Cand1                | -7.0081 | 0.04843789 | 1392514_at   | Bxdc1_predicted      | -10.211 | 0.0000006  |
| 1370387_at   | "Cyp3a9"               | " -13.1978" | "0.00000181" | 1388437_at | NA                   | 6.9933  | 0.04982966 | 1373393_at   | LOC299907            | 10.21   | 0.0000006  |
| 1392888_at   | "Gpc4"                 | " -13.1971" | "0.00000181" |            |                      |         |            | 1376619_at   | RGD1561090_predicted | 10.2092 | 0.0000006  |
| 1368973_at   | "Adar"                 | " -13.1708" | "0.00000187" |            |                      |         |            | 1380182_at   | RGD1563437_predicted | 10.2063 | 0.0000006  |
| 1376520_at   | NA                     | " 13.1599"  | "0.00000190" |            |                      |         |            | 1378198_at   | Ophn1_predicted      | 10.1936 | 0.00000061 |
| 1384236_at   | NA                     | " 13.1587"  | "0.00000190" |            |                      |         |            | 1388770_at   | RGD1304890           | -10.175 | 0.00000062 |
| 1377603_at   | "Snx24"                | " 13.1423"  | "0.00000194" |            |                      |         |            | 1371891_at   | RGD1308430_predicted | -10.181 | 0.00000062 |
| 1394340_at   | "Inpp1"                | " 13.1350"  | "0.00000196" |            |                      |         |            | 1383001_at   | RGD1560812_predicted | -10.183 | 0.00000062 |
| 1370200_at   | "Glud1"                | " 13.1006"  | "0.00000205" |            |                      |         |            | 1380100_at   | RGD1561817_predicted | 10.1756 | 0.00000062 |
| 1377181_at   | NA                     | " -13.0784" | "0.00000211" |            |                      |         |            | 1377199_at   | NA                   | 10.1537 | 0.00000064 |
| 1367791_at   | "Ramp1"                | " 13.0726"  | "0.00000213" |            |                      |         |            | 1386962_at   | Plcb4                | 10.1497 | 0.00000064 |
| 1367905_at   | "Enpp3"                | " -13.0676" | "0.00000214" |            |                      |         |            | 1370366_at   | Timm10               | -10.145 | 0.00000064 |
| 1380170_at   | "Gabarapl2"            | " -13.0674" | "0.00000214" |            |                      |         |            | 1377755_at   | Ascc3_predicted      | 10.133  | 0.00000065 |
| 1390944_at   | "MGC108776"            | " 13.0645"  | "0.00000215" |            |                      |         |            | 1376098_a_at | Lad1_predicted       | -10.134 | 0.00000065 |
| 1390789_at   | "Acad11_predicted"     | " 13.0508"  | "0.00000219" |            |                      |         |            | 1395999_at   | NA                   | 10.1323 | 0.00000065 |
| 1368651_at   | "Pklr"                 | " 13.0218"  | "0.00000227" |            |                      |         |            | 1389131_at   | Nt5c3l               | -10.129 | 0.00000065 |
| 1389647_at   | "Snx13_predicted"      | " 13.0178"  | "0.00000228" |            |                      |         |            | 1371718_at   | Sra1                 | -10.126 | 0.00000065 |
| 1389609_at   | "Tm7sf3"               | " 12.9999"  | "0.00000234" |            |                      |         |            | 1375846_at   | Xpr1_predicted       | 10.1382 | 0.00000065 |
| 1387631_at   | "Hpgd"                 | " 12.9938"  | "0.00000236" |            |                      |         |            | 1398811_at   | Jtb                  | -10.109 | 0.00000066 |
| 1379467_at   | NA                     | " -12.9726" | "0.00000242" |            |                      |         |            | 1393057_at   | LOC308320            | -10.11  | 0.00000066 |
| 1372569_at   | "Fhl3_predicted"       | " 12.9691"  | "0.00000243" |            |                      |         |            | 1367972_at   | Cand1                | -10.099 | 0.00000067 |
| 1381206_at   | NA                     | " 12.9574"  | "0.00000247" |            |                      |         |            | 1374190_at   | Clybl                | 10.1024 | 0.00000067 |
| 1390146_at   | NA                     | " -12.9547" | "0.00000248" |            |                      |         |            | 1383710_at   | LOC362683            | 10.0955 | 0.00000067 |
| 1384775_s_at | "Tmprss8"              | " 12.9437"  | "0.00000252" |            |                      |         |            | 1379785_at   | NA                   | -10.103 | 0.00000067 |
| 1380695_at   | NA                     | " -12.9240" | "0.00000258" |            |                      |         |            | 1387950_at   | Nip7                 | -10.091 | 0.00000067 |
| 1373240_at   | "Dhrs3"                | " 12.9198"  | "0.00000260" |            |                      |         |            | 1373479_at   | Ppp3ca               | 10.0895 | 0.00000067 |
| 1367987_at   | "Rnpep"                | " -12.9002" | "0.00000266" |            |                      |         |            | 1367624_at   | Atf4                 | -10.065 | 0.00000068 |
| 1367614_at   | "Anxa1"                | " -12.9001" | "0.00000266" |            |                      |         |            | 1383278_at   | Centg2_predicted     | 10.0788 | 0.00000068 |
| 1388454_at   | "RGD1562933_predicted" | " 12.8799"  | "0.00000274" |            |                      |         |            | 1398803_at   | Dync1h1              | 10.07   | 0.00000068 |
| 1395794_at   | "Tpm1"                 | " -12.8748" | "0.00000276" |            |                      |         |            | 1385128_at   | NA                   | 10.0564 | 0.00000068 |
| 1382579_at   | "Tnrc9_predicted"      | " 12.8510"  | "0.00000284" |            |                      |         |            | 1394290_at   | NA                   | 10.0625 | 0.00000068 |
| 1376191_at   | "Hpgd"                 | " 12.8405"  | "0.00000288" |            |                      |         |            | 1381336_at   | NA                   | 10.0638 | 0.00000068 |
| 1373649_at   | "LOC691853"            | " 12.8382"  | "0.00000289" |            |                      |         |            | 1390387_at   | NA                   | 10.0657 | 0.00000068 |



|              |                        |             |              |
|--------------|------------------------|-------------|--------------|
| 1379910_at   | "RGD1561967_predicted" | " -12.7954" | "0.00000306" |
| 1368446_at   | "Spink1"               | " -12.7708" | "0.00000316" |
| 1392045_at   | "Tmem22"               | " 12.7654"  | "0.00000319" |
| 1397375_at   | "AcsI5"                | " -12.7472" | "0.00000326" |
| 1387690_at   | "Casp3"                | " 12.7232"  | "0.00000337" |
| 1387542_at   | "Slc9a3"               | " 12.6914"  | "0.00000352" |
| 1381858_at   | NA                     | " 12.6856"  | "0.00000354" |
| 1373017_at   | "SucI2"                | " 12.6749"  | "0.00000359" |
| 1382761_at   | "Pde7a"                | " -12.6703" | "0.00000362" |
| 1399125_at   | "Inpp1"                | " 12.6623"  | "0.00000365" |
| 1373497_at   | NA                     | " 12.6612"  | "0.00000366" |
| 1388738_at   | "RGD1563485_predicted" | " 12.6567"  | "0.00000368" |
| 1378147_at   | "RGD1561878_predicted" | " 12.6350"  | "0.00000379" |
| 1385739_at   | NA                     | " 12.6308"  | "0.00000381" |
| 1389443_at   | NA                     | " -12.6120" | "0.00000391" |
| 1370834_at   | "Hs3st1"               | " -12.6036" | "0.00000395" |
| 1380397_at   | NA                     | " 12.5873"  | "0.00000404" |
| 1394132_at   | "MGC72974"             | " 12.5868"  | "0.00000404" |
| 1376066_at   | NA                     | " -12.5799" | "0.00000408" |
| 1367933_at   | "Amd1"                 | " -12.5711" | "0.00000413" |
| 1392894_at   | "Fgl2"                 | " 12.5624"  | "0.00000418" |
| 1393170_at   | "RGD1561431_predicted" | " 12.5569"  | "0.00000421" |
| 1375522_at   | "Nmt1"                 | " -12.5557" | "0.00000422" |
| 1393837_at   | "RGD1565966_predicted" | " -12.5523" | "0.00000424" |
| 1373780_at   | "Tspan1"               | " -12.5420" | "0.00000430" |
| 1389703_at   | "Zzef1_predicted"      | " 12.5279"  | "0.00000438" |
| 1371557_at   | "Thap4"                | " 12.5246"  | "0.00000440" |
| 1379023_at   | "Txndc12"              | " -12.5016" | "0.00000454" |
| 1389364_at   | "Ndfip2_predicted"     | " 12.4902"  | "0.00000461" |
| 1371520_at   | "Znf291"               | " 12.4863"  | "0.00000463" |
| 1384958_at   | NA                     | " -12.4855" | "0.00000464" |
| 1386916_at   | "Aco1"                 | " 12.4816"  | "0.00000466" |
| 1393412_at   | "Fam3c"                | " 12.4791"  | "0.00000468" |
| 1394562_at   | "Ptpm"                 | " -12.4762" | "0.00000470" |
| 1368008_at   | "Prom1"                | " 12.4637"  | "0.00000478" |
| 1370237_at   | "Hadhsc"               | " 12.4438"  | "0.00000491" |
| 1376022_at   | NA                     | " -12.4373" | "0.00000495" |
| 1372149_at   | "Auh_predicted"        | " 12.4247"  | "0.00000503" |
| 1383697_at   | NA                     | " -12.4103" | "0.00000513" |
| 1376102_at   | "Tmbim1"               | " -12.4069" | "0.00000516" |
| 1373616_at   | "Slk"                  | " -12.3759" | "0.00000538" |
| 1368164_at   | "Blvra"                | " 12.3726"  | "0.00000540" |
| 1371662_at   | "Kars"                 | " -12.3657" | "0.00000546" |
| 1379416_at   | NA                     | " 12.3643"  | "0.00000547" |
| 1387270_at   | "Hhex"                 | " -12.3594" | "0.00000550" |
| 1387982_at   | "Tlr4"                 | " -12.3466" | "0.00000560" |
| 1392799_at   | "RGD1561254_predicted" | " -12.3298" | "0.00000573" |
| 1390553_at   | NA                     | " -12.3072" | "0.00000591" |
| 1367687_a_at | "Pam"                  | " -12.2931" | "0.00000602" |
| 1392946_at   | NA                     | " 12.2817"  | "0.00000612" |

|              |                      |         |            |
|--------------|----------------------|---------|------------|
| 1374967_at   | NA                   | 10.0695 | 0.00000068 |
| 1375358_at   | NA                   | 10.0791 | 0.00000068 |
| 1390711_at   | NA                   | 10.0795 | 0.00000068 |
| 1372813_at   | RGD1306682_predicted | -10.08  | 0.00000068 |
| 1380309_at   | RGD1309443_predicted | 10.067  | 0.00000068 |
| 1387059_at   | Stk39                | 10.0757 | 0.00000068 |
| 1373578_at   | Trim2                | 10.0666 | 0.00000068 |
| 1390300_at   | NA                   | 10.0493 | 0.00000069 |
| 1376337_at   | Smarca2              | 10.0437 | 0.00000069 |
| 1398866_at   | Magi3                | 10.0329 | 0.0000007  |
| 1388794_at   | Rbmxrt_predicted     | -10.023 | 0.00000071 |
| 1376035_at   | Ttc7b_predicted      | 10.0196 | 0.00000071 |
| 1374349_at   | Ctdspl_predicted     | 10.0151 | 0.00000072 |
| 1377359_at   | LOC501665            | -10.017 | 0.00000072 |
| 1375414_at   | Taf9                 | -10.012 | 0.00000072 |
| 1383931_at   | Ptprk                | 9.9979  | 0.00000073 |
| 1379945_at   | RGD1563166_predicted | -10.003 | 0.00000073 |
| 1386916_at   | Aco1                 | 9.9747  | 0.00000075 |
| 1369676_at   | Itpr2                | 9.9813  | 0.00000075 |
| 1392916_at   | Mtap7_predicted      | 9.9784  | 0.00000075 |
| 1367849_at   | Sdc1                 | -9.9701 | 0.00000075 |
| 1387369_at   | Exoc6                | 9.9593  | 0.00000076 |
| 1368476_at   | Nr3c2                | 9.9553  | 0.00000076 |
| 1398810_at   | Pdap1                | -9.9585 | 0.00000076 |
| 1372614_at   | RGD1311849_predicted | 9.9586  | 0.00000076 |
| 1368944_at   | Dlgh1                | 9.9305  | 0.00000078 |
| 1391415_at   | LOC289809            | -9.9358 | 0.00000078 |
| 1398935_at   | LOC683687            | 9.9299  | 0.00000078 |
| 1372257_at   | NA                   | 9.9393  | 0.00000078 |
| 1373145_at   | RGD1560511_predicted | 9.932   | 0.00000078 |
| 1368321_at   | Egr1                 | -9.9231 | 0.00000079 |
| 1374135_at   | Ipo4_predicted       | -9.9169 | 0.00000079 |
| 1372457_at   | Mtus1                | 9.9282  | 0.00000079 |
| 1373464_at   | NA                   | 9.9261  | 0.00000079 |
| 1390873_at   | Btbd11_predicted     | 9.9074  | 0.0000008  |
| 1368311_at   | Mgmt                 | 9.9021  | 0.0000008  |
| 1379244_at   | NA                   | 9.9078  | 0.0000008  |
| 1395325_s_at | Tmem32_predicted     | -9.9136 | 0.0000008  |
| 1374070_at   | Gpx2                 | -9.8898 | 0.00000081 |
| 1378791_at   | Map3k4_predicted     | 9.8912  | 0.00000081 |
| 1389703_at   | Zzef1_predicted      | 9.8948  | 0.00000081 |
| 1368032_at   | Nolc1                | -9.8812 | 0.00000082 |
| 1372059_at   | RGD1309437           | 9.8799  | 0.00000082 |
| 1373430_at   | Baz2b_predicted      | 9.858   | 0.00000084 |
| 1370317_at   | LOC245960            | -9.8623 | 0.00000084 |
| 1373069_at   | Mrps30_predicted     | -9.8528 | 0.00000084 |
| 1379269_at   | NA                   | 9.8608  | 0.00000084 |
| 1399034_at   | Pcnx                 | 9.8597  | 0.00000084 |
| 1393626_at   | Sorl1_predicted      | 9.8524  | 0.00000084 |
| 1373962_at   | Usp32_predicted      | 9.8613  | 0.00000084 |

|              |                        |            |              |
|--------------|------------------------|------------|--------------|
| 1374310_at   | "Ppm1j"                | "-12.2812" | "0.00000612" |
| 1373957_at   | "Rein"                 | "12.2757"  | "0.00000617" |
| 1378315_at   | NA                     | "12.2645"  | "0.00000627" |
| 1393319_a_at | "RGD1562478_predicted" | "12.2444"  | "0.00000644" |
| 1384965_at   | "Slk"                  | "-12.2379" | "0.00000650" |
| 1378321_at   | "Rassf4"               | "12.2164"  | "0.00000669" |
| 1377825_at   | NA                     | "12.2148"  | "0.00000671" |
| 1368593_at   | "Cd1d1"                | "-12.2103" | "0.00000675" |
| 1390125_at   | "Tm9sf1"               | "12.1996"  | "0.00000685" |
| 1390228_at   | NA                     | "-12.1867" | "0.00000697" |
| 1378197_at   | "KIFC2"                | "12.1769"  | "0.00000707" |
| 1371527_at   | "Emp1"                 | "12.1649"  | "0.00000719" |
| 1398378_at   | "Gstk1"                | "12.1626"  | "0.00000721" |
| 1374035_at   | "Rem2"                 | "-12.1577" | "0.00000726" |
| 1372095_at   | "RGD1309821_predicted" | "12.1525"  | "0.00000731" |
| 1369717_at   | "Nmu"                  | "-12.1514" | "0.00000732" |
| 1370211_at   | "Nrgn"                 | "-12.1508" | "0.00000733" |
| 1368838_at   | "Tpm4"                 | "-12.1351" | "0.00000749" |
| 1379390_at   | "St6galnac2"           | "12.1173"  | "0.00000768" |
| 1389199_at   | NA                     | "12.1097"  | "0.00000776" |
| 1371791_at   | "Surf4"                | "-12.1015" | "0.00000785" |
| 1369896_s_at | "Rbm16"                | "-12.0747" | "0.00000814" |
| 1370810_at   | "Ccmd2"                | "-12.0734" | "0.00000816" |
| 1369518_at   | "Pik3r3"               | "-12.0729" | "0.00000816" |
| 1381974_at   | "Btbd3_predicted"      | "12.0716"  | "0.00000818" |
| 1367735_at   | "Acadl"                | "12.0636"  | "0.00000827" |
| 1371004_at   | "Sort1"                | "-12.0572" | "0.00000834" |
| 1384770_at   | NA                     | "12.0562"  | "0.00000836" |
| 1393114_at   | "siat7D"               | "-12.0478" | "0.00000845" |
| 1372329_at   | "RGD1311435"           | "12.0446"  | "0.00000849" |
| 1393039_a_at | "RGD1562478_predicted" | "12.0428"  | "0.00000851" |
| 1383900_at   | "RGD1562974_predicted" | "-12.0374" | "0.00000858" |
| 1373357_at   | NA                     | "12.0212"  | "0.00000877" |
| 1384069_at   | "Lrp11_predicted"      | "12.0166"  | "0.00000883" |
| 1391282_at   | "RGD1306962_predicted" | "12.0117"  | "0.00000889" |
| 1389862_at   | "RGD1305327"           | "-12.0061" | "0.00000896" |
| 1373226_at   | NA                     | "-11.9994" | "0.00000904" |
| 1392948_at   | "Clic6"                | "-11.9953" | "0.00000909" |
| 1381403_at   | "Me2_predicted"        | "-11.9873" | "0.00000920" |
| 1382211_at   | NA                     | "-11.9757" | "0.00000935" |
| 1376159_at   | "RGD1562321_predicted" | "-11.9440" | "0.00000977" |
| 1371351_at   | "MGC112727"            | "-11.9284" | "0.00000999" |
| 1373536_at   | NA                     | "11.9239"  | "0.00001005" |
| 1383212_at   | NA                     | "11.9197"  | "0.00001011" |
| 1370219_at   | "Cyba"                 | "-11.9060" | "0.00001031" |
| 1395707_at   | NA                     | "11.9045"  | "0.00001033" |
| 1379282_at   | "Lrrfp2"               | "11.8973"  | "0.00001043" |
| 1369249_at   | "Ank"                  | "11.8931"  | "0.00001050" |
| 1379117_at   | NA                     | "11.8522"  | "0.00001112" |
| 1383964_at   | "Ankrd50_predicted"    | "11.8359"  | "0.00001138" |

|              |                      |         |            |
|--------------|----------------------|---------|------------|
| 1390406_at   | Arhgap18_predicted   | 9.8399  | 0.00000085 |
| 1389291_at   | Chchd3_predicted     | 9.844   | 0.00000085 |
| 1373898_at   | LOC360760            | 9.8444  | 0.00000085 |
| 1379997_at   | NA                   | 9.8468  | 0.00000085 |
| 1372069_at   | Ankrd15              | 9.8234  | 0.00000086 |
| 1377945_at   | Ddx18                | -9.8274 | 0.00000086 |
| 1391238_at   | Gmcs                 | 9.8368  | 0.00000086 |
| 1375895_at   | NA                   | -9.8241 | 0.00000086 |
| 1384835_at   | NA                   | 9.8222  | 0.00000086 |
| 1384504_at   | NA                   | 9.834   | 0.00000086 |
| 1372744_at   | Pkp4_predicted       | 9.8294  | 0.00000086 |
| 1390392_at   | RGD1309602_predicted | -9.8282 | 0.00000086 |
| 1391478_at   | Znf532_predicted     | 9.8243  | 0.00000086 |
| 1367713_at   | Eif2s1               | -9.8096 | 0.00000087 |
| 1390561_at   | Lig4_predicted       | -9.8092 | 0.00000087 |
| 1383752_at   | Nol1_predicted       | -9.8131 | 0.00000087 |
| 1373036_at   | RGD1561455_predicted | 9.8144  | 0.00000087 |
| 1372121_at   | Usp9x_predicted      | 9.8031  | 0.00000088 |
| 1371726_at   | NA                   | 9.7906  | 0.00000089 |
| 1374410_at   | NA                   | 9.7944  | 0.00000089 |
| 1373105_at   | Tmed1                | -9.7906 | 0.00000089 |
| 1375995_at   | RGD1304592_predicted | 9.7804  | 0.0000009  |
| 1387925_at   | Asns                 | -9.7724 | 0.00000091 |
| 1398231_at   | NA                   | 9.7682  | 0.00000091 |
| 1371572_at   | App                  | 9.763   | 0.00000092 |
| 1388953_at   | Gnl3                 | -9.7565 | 0.00000092 |
| 1391474_at   | RGD1560170_predicted | 9.7548  | 0.00000092 |
| 1376608_at   | RGD1565135_predicted | 9.7625  | 0.00000092 |
| 1386882_at   | Tctex1               | -9.765  | 0.00000092 |
| 1389316_at   | Usp9x_predicted      | 9.748   | 0.00000093 |
| 1384198_at   | Cova1_predicted      | 9.7377  | 0.00000094 |
| 1372787_at   | Criz1                | -9.7336 | 0.00000094 |
| 1375901_at   | Ddx21b               | -9.7326 | 0.00000094 |
| 1379999_at   | Mical3               | 9.7332  | 0.00000094 |
| 1390515_at   | NA                   | 9.7289  | 0.00000094 |
| 1385857_at   | Ophn1_predicted      | 9.7369  | 0.00000094 |
| 1390237_at   | Timm8a               | -9.7393 | 0.00000094 |
| 1389355_at   | Ier5                 | -9.712  | 0.00000096 |
| 1388668_at   | Mettl2_predicted     | -9.7116 | 0.00000096 |
| 1370303_at   | Slc35a4              | -9.7107 | 0.00000096 |
| 1388560_at   | Wdr77                | -9.7195 | 0.00000096 |
| 1377387_a_at | NA                   | -9.7075 | 0.00000097 |
| 1393106_x_at | Gtf2f1               | -9.6906 | 0.00000099 |
| 1368994_a_at | Garnl1               | 9.678   | 0.000001   |
| 1375140_at   | LOC686892            | 9.6845  | 0.000001   |
| 1383378_at   | NA                   | 9.6794  | 0.000001   |
| 1374326_at   | Ppan                 | -9.6806 | 0.000001   |
| 1373273_at   | Prpf38a_predicted    | -9.6787 | 0.000001   |
| 1383055_at   | Gnaq                 | 9.6678  | 0.00000101 |
| 1374746_at   | LOC500877            | -9.6643 | 0.00000101 |

|              |                        |            |              |
|--------------|------------------------|------------|--------------|
| 1382253_at   | "RGD1307173"           | "-11.8258" | "0.00001154" |
| 1372399_at   | "RGD1307832_predicted" | "-11.7904" | "0.00001213" |
| 1388126_at   | "Minpp1"               | "-11.7902" | "0.00001213" |
| 1371899_at   | "Prkra"                | "11.7879"  | "0.00001217" |
| 1386970_at   | "Eif2b4"               | "-11.7606" | "0.00001266" |
| 1373412_at   | "Nt5c3_predicted"      | "-11.7547" | "0.00001276" |
| 1389873_at   | "Pycard"               | "11.7375"  | "0.00001308" |
| 1383687_at   | NA                     | "11.7318"  | "0.00001318" |
| 1380388_at   | NA                     | "11.7300"  | "0.00001322" |
| 1393992_at   | "Hoxa7"                | "11.7268"  | "0.00001328" |
| 1373173_at   | NA                     | "-11.7251" | "0.00001331" |
| 1375728_at   | "Entpd4_predicted"     | "-11.6991" | "0.00001381" |
| 1373036_at   | "RGD1561455_predicted" | "11.6888"  | "0.00001401" |
| 1394731_at   | "Csnk1g3"              | "-11.6858" | "0.00001407" |
| 1378481_at   | NA                     | "11.6828"  | "0.00001413" |
| 1385513_at   | NA                     | "11.6478"  | "0.00001486" |
| 1395410_at   | "Ppp2r3a"              | "11.6163"  | "0.00001554" |
| 1379632_at   | "RGD1308774"           | "11.6161"  | "0.00001555" |
| 1383920_at   | "Amt"                  | "11.6159"  | "0.00001555" |
| 1370507_at   | "Dlgap4"               | "-11.5896" | "0.00001615" |
| 1370699_a_at | "Egfr"                 | "11.5886"  | "0.00001617" |
| 1396126_at   | NA                     | "-11.5853" | "0.00001625" |
| 1387952_a_at | "Cd44"                 | "11.5720"  | "0.00001656" |
| 1371653_at   | "Tpm4"                 | "-11.5682" | "0.00001665" |
| 1368910_at   | "Ppm2c"                | "-11.5679" | "0.00001666" |
| 1382629_at   | "Mlst2"                | "11.5673"  | "0.00001667" |
| 1397410_at   | "RGD1564895_predicted" | "-11.5583" | "0.00001689" |
| 1395268_at   | "Wwp1"                 | "11.5372"  | "0.00001741" |
| 1374935_at   | NA                     | "11.5294"  | "0.00001761" |
| 1387239_a_at | "Padi4"                | "-11.5221" | "0.00001780" |
| 1388748_at   | "Laptn4a"              | "-11.5162" | "0.00001795" |
| 1388830_at   | "Pkn2"                 | "11.5072"  | "0.00001818" |
| 1382995_at   | "Nrp2"                 | "11.5062"  | "0.00001821" |
| 1378288_at   | "RGD1311100_predicted" | "11.4967"  | "0.00001846" |
| 1375061_at   | NA                     | "-11.4892" | "0.00001866" |
| 1369799_at   | "Abat"                 | "-11.4797" | "0.00001892" |
| 1388432_at   | "Optn"                 | "11.4785"  | "0.00001895" |
| 1391433_at   | "Mte1"                 | "-11.4682" | "0.00001923" |
| 1371103_at   | "Rab6a"                | "-11.4619" | "0.00001941" |
| 1395980_at   | "RGD1311640_predicted" | "11.4600"  | "0.00001946" |
| 1373462_at   | "Eed_predicted"        | "-11.4160" | "0.00002075" |
| 1383970_at   | NA                     | "11.4082"  | "0.00002098" |
| 1378791_at   | "Map3k4_predicted"     | "11.4069"  | "0.00002102" |
| 1395532_at   | "LOC688018"            | "-11.4028" | "0.00002115" |
| 1367734_at   | "Akr1b4"               | "11.4023"  | "0.00002116" |
| 1381390_at   | "RGD1564833_predicted" | "11.3944"  | "0.00002141" |
| 1372809_at   | "LOC290595"            | "11.3891"  | "0.00002157" |
| 1389118_s_at | "LOC685385"            | "-11.3843" | "0.00002172" |
| 1388909_at   | "Oxnad1_predicted"     | "11.3756"  | "0.00002200" |
| 1372099_at   | "LOC297530"            | "11.3736"  | "0.00002206" |

|              |                      |         |            |
|--------------|----------------------|---------|------------|
| 1393089_at   | LOC690035            | 9.6733  | 0.00000101 |
| 1377019_at   | NA                   | -9.6582 | 0.00000101 |
| 1391916_at   | NA                   | 9.6657  | 0.00000101 |
| 1383194_a_at | NA                   | 9.6671  | 0.00000101 |
| 1383604_at   | NA                   | 9.67    | 0.00000101 |
| 1379386_at   | RGD1563164_predicted | -9.6656 | 0.00000101 |
| 1380969_at   | RGD1564670_predicted | 9.6643  | 0.00000101 |
| 1375685_at   | Tcfcp2l1_predicted   | 9.6614  | 0.00000101 |
| 1376100_at   | Tubb6                | -9.6535 | 0.00000101 |
| 1367693_at   | Ywhah                | -9.6576 | 0.00000101 |
| 1383719_at   | Mtap7_predicted      | 9.6438  | 0.00000103 |
| 1389279_at   | NA                   | -9.6399 | 0.00000103 |
| 1398473_at   | Bloc1s2              | -9.6328 | 0.00000104 |
| 1386755_at   | LOC312863            | 9.6316  | 0.00000104 |
| 1371820_at   | Mesdc2               | -9.6346 | 0.00000104 |
| 1371822_at   | Polr3d               | -9.63   | 0.00000104 |
| 1399013_at   | RGD1310905_predicted | -9.6362 | 0.00000104 |
| 1368070_at   | Stx8                 | 9.6207  | 0.00000105 |
| 1388159_at   | NA                   | 9.6167  | 0.00000106 |
| 1392088_at   | Pde8b                | 9.6091  | 0.00000107 |
| 1373741_at   | Pus1                 | -9.6055 | 0.00000107 |
| 1367787_at   | Ica1                 | 9.5978  | 0.00000108 |
| 1381145_at   | NA                   | 9.6016  | 0.00000108 |
| 1374481_at   | Cno                  | -9.5902 | 0.00000109 |
| 1378359_at   | RGD1563950_predicted | -9.584  | 0.0000011  |
| 1372679_at   | Unc45a               | -9.5849 | 0.0000011  |
| 1373738_at   | LOC686999            | -9.5771 | 0.00000111 |
| 1390194_at   | NA                   | 9.5724  | 0.00000111 |
| 1386918_a_at | Oprs1                | -9.5684 | 0.00000112 |
| 1371663_at   | RGD1305138_predicted | -9.558  | 0.00000113 |
| 1372143_at   | Ube2v2               | -9.5584 | 0.00000113 |
| 1399056_at   | LOC365592            | 9.5508  | 0.00000114 |
| 1376639_at   | Rnf126               | -9.5531 | 0.00000114 |
| 1389510_at   | Lyar                 | -9.5378 | 0.00000116 |
| 1393143_at   | NA                   | 9.5303  | 0.00000116 |
| 1372544_at   | NA                   | 9.534   | 0.00000116 |
| 1372176_at   | Prkca                | 9.5356  | 0.00000116 |
| 1373516_at   | RGD1305633_predicted | -9.5383 | 0.00000116 |
| 1376681_at   | RGD1308302           | -9.5402 | 0.00000116 |
| 1383461_at   | RGD1311362           | -9.541  | 0.00000116 |
| 1371571_at   | App                  | 9.5243  | 0.00000117 |
| 1388400_at   | Cdc34_predicted      | -9.521  | 0.00000117 |
| 1390856_at   | NA                   | 9.5277  | 0.00000117 |
| 1367833_at   | Psmc5                | -9.5218 | 0.00000117 |
| 1389245_at   | Psm7_predicted       | -9.517  | 0.00000117 |
| 1371622_at   | RGD1564623_predicted | -9.5157 | 0.00000117 |
| 1397596_at   | Trim2                | 9.5239  | 0.00000117 |
| 1392983_at   | Psm12                | -9.5122 | 0.00000118 |
| 1368083_at   | Ccnh                 | -9.5037 | 0.00000119 |
| 1390692_at   | Ctpps_predicted      | -9.5057 | 0.00000119 |

|                |                        |            |              |
|----------------|------------------------|------------|--------------|
| 1388848_at     | "RGD1308350"           | "-11.3634" | "0.00002239" |
| 1370194_at     | "Snap23"               | "-11.3550" | "0.00002267" |
| 1369953_a_at   | "Cd24"                 | "-11.3169" | "0.00002396" |
| 1369747_at     | "Nat2"                 | "11.3163"  | "0.00002399" |
| 1369976_at     | "Dyml1"                | "-11.3071" | "0.00002431" |
| 1374846_at     | "Clp1"                 | "-11.3026" | "0.00002447" |
| 1382235_at     | "RGD1306809_predicted" | "11.2995"  | "0.00002458" |
| 1394761_at     | NA                     | "11.2938"  | "0.00002479" |
| 1372920_at     | "LOC680409"            | "11.2833"  | "0.00002517" |
| 1398395_at     | "Itgb1bp1_predicted"   | "-11.2746" | "0.00002549" |
| 1394740_at     | NA                     | "11.2725"  | "0.00002557" |
| AFFX_Rat_Hexoh | "Hk1"                  | "-11.2640" | "0.00002589" |
| 1384361_at     | "Mal2"                 | "11.2634"  | "0.00002591" |
| 1377034_at     | "Serpib1a"             | "11.2624"  | "0.00002595" |
| 1376804_at     | "RGD1560646"           | "11.2598"  | "0.00002605" |
| 1385432_at     | "LOC683713"            | "11.2587"  | "0.00002609" |
| 1371393_at     | "Clstn1"               | "11.2579"  | "0.00002613" |
| 1382218_at     | "RGD1305807"           | "11.2550"  | "0.00002624" |
| 1377854_at     | "RGD1305647_predicted" | "-11.2529" | "0.00002632" |
| 1391817_at     | NA                     | "-11.2491" | "0.00002646" |
| 1379803_at     | "Lmo4"                 | "-11.2430" | "0.00002670" |
| 1372816_at     | NA                     | "11.2382"  | "0.00002689" |
| 1399069_at     | "RGD1310351_predicted" | "11.2361"  | "0.00002697" |
| 1382592_at     | "RGD1306908"           | "11.2356"  | "0.00002699" |
| 1392349_at     | "Slc5a3"               | "-11.2196" | "0.00002764" |
| 1374315_at     | NA                     | "11.2181"  | "0.00002770" |
| 1388310_at     | "Sui1-rs1_predicted"   | "-11.2138" | "0.00002787" |
| 1376989_at     | NA                     | "-11.2017" | "0.00002837" |
| 1373578_at     | "Trim2"                | "11.1904"  | "0.00002885" |
| 1385269_s_at   | "LOC304743"            | "-11.1854" | "0.00002906" |
| 1385054_at     | NA                     | "-11.1706" | "0.00002971" |
| 1377359_at     | "LOC501665"            | "-11.1703" | "0.00002972" |
| 1383128_at     | "Rpl5"                 | "-11.1679" | "0.00002982" |
| 1378305_at     | "Tm4sf1_predicted"     | "-11.1624" | "0.00003006" |
| 1367702_at     | "Acadm"                | "11.1624"  | "0.00003006" |
| 1378284_at     | NA                     | "-11.1597" | "0.00003018" |
| 1380577_at     | "Abcg2"                | "11.1549"  | "0.00003040" |
| 1387769_a_at   | "Id3"                  | "-11.1472" | "0.00003075" |
| 1374146_at     | "Mad2l2"               | "11.1405"  | "0.00003105" |
| 1371797_at     | "Cad"                  | "-11.1236" | "0.00003184" |
| 1372019_at     | "RGD1310128_predicted" | "-11.1229" | "0.00003187" |
| 1367709_at     | "Cd63"                 | "-11.1182" | "0.00003209" |
| 1392534_at     | "Tmepai_predicted"     | "-11.1162" | "0.00003219" |
| 1370901_at     | "RGD1306215_predicted" | "-11.1162" | "0.00003219" |
| 1391099_at     | NA                     | "-11.1073" | "0.00003262" |
| 1377666_at     | "Chdh"                 | "11.1041"  | "0.00003277" |
| 1369944_at     | "Marcks11"             | "-11.0959" | "0.00003317" |
| 1379739_at     | NA                     | "-11.0945" | "0.00003324" |
| 1373392_at     | "Tparl"                | "-11.0925" | "0.00003334" |
| 1390437_at     | NA                     | "11.0844"  | "0.00003374" |

|            |                        |         |            |
|------------|------------------------|---------|------------|
| 1384475_at | Plekha5                | 9.5034  | 0.00000119 |
| 1379575_at | Rere                   | 9.499   | 0.00000119 |
| 1383250_at | Utp14a                 | -9.5038 | 0.00000119 |
| 1383606_at | Mtac2d1                | 9.4897  | 0.00000121 |
| 1374180_at | NA                     | -9.4894 | 0.00000121 |
| 1368117_at | Gphn                   | 9.4773  | 0.00000122 |
| 1377751_at | NA                     | 9.4752  | 0.00000122 |
| 1371455_at | Pmm1                   | -9.4758 | 0.00000122 |
| 1372496_at | "RGD1561264_predicted" | -9.4753 | 0.00000122 |
| 1394849_at | Zbtb20_predicted       | 9.4818  | 0.00000122 |
| 1396254_at | Ncoa2                  | 9.4705  | 0.00000123 |
| 1373666_at | Rapegf5                | 9.4694  | 0.00000123 |
| 1374289_at | Rpo1-1                 | -9.4719 | 0.00000123 |
| 1383256_at | Dnrtip2_predicted      | -9.4603 | 0.00000124 |
| 1388424_at | Eif3s1_predicted       | -9.4591 | 0.00000124 |
| 1376235_at | NA                     | 9.4576  | 0.00000124 |
| 1367742_at | Cpt1b                  | -9.4536 | 0.00000125 |
| 1372990_at | Creb3                  | -9.4446 | 0.00000126 |
| 1389265_at | Gbe1                   | 9.4399  | 0.00000126 |
| 1368355_at | Myo5b                  | 9.4482  | 0.00000126 |
| 1384518_at | "RGD1563764_predicted" | 9.4398  | 0.00000126 |
| 1372821_at | "RGD1565969_predicted" | 9.4479  | 0.00000126 |
| 1393364_at | Slc12a8                | 9.442   | 0.00000126 |
| 1379264_at | Znrf1_predicted        | 9.4434  | 0.00000126 |
| 1370245_at | Ctsl                   | -9.4251 | 0.00000128 |
| 1373462_at | Eed_predicted          | -9.4214 | 0.00000128 |
| 1390452_at | Epb4.1l1               | 9.422   | 0.00000128 |
| 1372362_at | Galk2_predicted        | 9.4299  | 0.00000128 |
| 1389108_at | LOC363309              | 9.4265  | 0.00000128 |
| 1389869_at | LOC689397              | -9.4258 | 0.00000128 |
| 1373497_at | NA                     | 9.4228  | 0.00000128 |
| 1374066_at | Cdc2l6_predicted       | 9.4165  | 0.00000129 |
| 1395654_at | NA                     | -9.4135 | 0.00000129 |
| 1374128_at | NA                     | 9.4146  | 0.00000129 |
| 1376001_at | Praf1_predicted        | -9.4121 | 0.00000129 |
| 1376465_at | "RGD1563869_predicted" | 9.4131  | 0.00000129 |
| 1379668_at | "RGD1564725_predicted" | -9.4171 | 0.00000129 |
| 1372701_at | Hspca                  | -9.4072 | 0.0000013  |
| 1368391_at | Slc7a1                 | -9.4037 | 0.0000013  |
| 1383548_at | Ankrd49_predicted      | -9.3987 | 0.00000131 |
| 1389569_at | Bxdc2                  | -9.4008 | 0.00000131 |
| 1375972_at | "RGD1307493_predicted" | -9.3986 | 0.00000131 |
| 1390885_at | NA                     | 9.3902  | 0.00000132 |
| 1383123_at | NA                     | 9.3934  | 0.00000132 |
| 1394564_at | NA                     | -9.3831 | 0.00000133 |
| 1383652_at | LOC502872              | -9.3794 | 0.00000134 |
| 1376833_at | "RGD1304793_predicted" | -9.3755 | 0.00000134 |
| 1398948_at | Tax1bp1                | 9.3715  | 0.00000135 |
| 1376576_at | Dusp11                 | -9.3634 | 0.00000136 |
| 1391607_at | "RGD1566319_predicted" | -9.368  | 0.00000136 |

|              |                        |             |              |
|--------------|------------------------|-------------|--------------|
| 1389110_at   | "Pprf18"               | " -11.0713" | "0.00003441" |
| 1389124_at   | "LOC690586"            | " 11.0699"  | "0.00003448" |
| 1390659_at   | NA                     | " 11.0647"  | "0.00003474" |
| 1390782_at   | "Clec14a"              | " -11.0617" | "0.00003490" |
| 1372433_at   | "RGD1310211_predicted" | " -11.0606" | "0.00003496" |
| 1369986_at   | "Hagh"                 | " 11.0518"  | "0.00003542" |
| 1397011_at   | NA                     | " 11.0501"  | "0.00003550" |
| 1391928_at   | "Gopc_predicted"       | " -11.0207" | "0.00003710" |
| 1389514_at   | "Lrrn6a"               | " -11.0129" | "0.00003753" |
| 1374591_at   | "RGD1561090_predicted" | " 11.0120"  | "0.00003758" |
| 1368052_at   | "Tspan8"               | " 11.0029"  | "0.00003809" |
| 1367995_at   | "Cat"                  | " 10.9999"  | "0.00003826" |
| 1372093_at   | "Mxi1"                 | " 10.9986"  | "0.00003833" |
| 1393575_at   | NA                     | " -10.9817" | "0.00003932" |
| 1395620_at   | "RGD1306302"           | " -10.9769" | "0.00003960" |
| 1371509_at   | "Tbrg1"                | " -10.9690" | "0.00004007" |
| 1377858_at   | "Prdm2"                | " -10.9684" | "0.00004010" |
| 1389349_s_at | "Il17re"               | " 10.9591"  | "0.00004067" |
| 1379393_at   | "Vil1_predicted"       | " 10.9577"  | "0.00004075" |
| 1370067_at   | "Me1"                  | " 10.9454"  | "0.00004151" |
| 1380346_at   | "Serpinb1a"            | " 10.9441"  | "0.00004159" |
| 1385211_at   | "RGD1310951_predicted" | " 10.9383"  | "0.00004195" |
| 1391765_at   | "Lrrc48"               | " 10.9370"  | "0.00004204" |
| 1377720_x_at | NA                     | " 10.9344"  | "0.00004220" |
| 1375918_at   | "LOC497967"            | " -10.9333" | "0.00004227" |
| 1371414_at   | "Gsn"                  | " -10.9290" | "0.00004254" |
| 1390555_at   | "RGD1564914_predicted" | " -10.9281" | "0.00004260" |
| 1367815_at   | "Slc5a6"               | " -10.9202" | "0.00004311" |
| 1373207_at   | NA                     | " 10.9198"  | "0.00004313" |
| 1395998_at   | "Nol5a"                | " -10.9001" | "0.00004442" |
| 1389466_at   | "LOC691155"            | " -10.8996" | "0.00004446" |
| 1379824_at   | "Tox_predicted"        | " 10.8989"  | "0.00004451" |
| 1397596_at   | "Trim2"                | " 10.8877"  | "0.00004527" |
| 1382975_at   | "Ceacam1"              | " -10.8758" | "0.00004608" |
| 1396144_at   | "RGD1561817_predicted" | " 10.8729"  | "0.00004628" |
| 1387084_at   | "Dpp4"                 | " -10.8698" | "0.00004650" |
| 1368991_at   | "Smpd3"                | " -10.8495" | "0.00004795" |
| 1388988_at   | "Abhd14b"              | " 10.8479"  | "0.00004806" |
| 1369259_at   | "Dio1"                 | " -10.8455" | "0.00004823" |
| 1376792_at   | "RGD1559797_predicted" | " 10.8341"  | "0.00004907" |
| 1398231_at   | NA                     | " 10.8294"  | "0.00004942" |
| 1393314_at   | NA                     | " 10.8264"  | "0.00004964" |
| 1383493_at   | NA                     | " -10.8209" | "0.00005006" |
| 1376060_at   | NA                     | " 10.8195"  | "0.00005016" |
| 1373060_at   | "RGD1306781_predicted" | " 10.8157"  | "0.00005045" |
| 1368533_at   | "Heph"                 | " 10.8150"  | "0.00005050" |
| 1387670_at   | "Gpd2"                 | " -10.7950" | "0.00005206" |
| 1394597_at   | "Dhd1"                 | " -10.7920" | "0.00005230" |
| 1385268_at   | "LOC304743"            | " -10.7820" | "0.00005309" |
| 1368123_at   | "Igf1r"                | " 10.7729"  | "0.00005382" |

|              |                      |              |            |
|--------------|----------------------|--------------|------------|
| 1380030_at   | Znf593_predicted     | -9.3618      | 0.00000136 |
| 1373876_at   | Eif4e2_predicted     | -9.3564      | 0.00000137 |
| 1385739_at   | NA                   | 9.3596       | 0.00000137 |
| 1371419_at   | Spnb2                | 9.3554       | 0.00000137 |
| 1377007_at   | NA                   | 9.3441       | 0.00000139 |
| 1377197_at   | NA                   | 9.3467       | 0.00000139 |
| 1397748_at   | NA                   | -9.3416      | 0.0000014  |
| 1377850_at   | Znrf1_predicted      | 9.3359       | 0.00000141 |
| 1371818_at   | NA                   | -9.3291      | 0.00000142 |
| 1379980_at   | NA                   | 9.3273       | 0.00000142 |
| 1375663_at   | Ube2f                | -9.3258      | 0.00000142 |
| 1398900_at   | Dctn3_predicted      | -9.32        | 0.00000143 |
| 1377794_at   | NA                   | -9.322       | 0.00000143 |
| 1384794_at   | NA                   | -9.3151      | 0.00000143 |
| 1379475_at   | RGD1563120_predicted | 9.3225       | 0.00000143 |
| 1368012_at   | Tep1                 | 9.3164       | 0.00000143 |
| 1371843_at   | Yipf5                | -9.3215      | 0.00000143 |
| 1387462_at   | Chrm3                | 9.3067       | 0.00000144 |
| 1372999_at   | Dcun1d5              | -9.3099      | 0.00000144 |
| 1388576_at   | Eif3s9               | -9.3126      | 0.00000144 |
| 1372748_at   | Tbc1d2b              | 9.3068       | 0.00000144 |
| 1370017_at   | Emd                  | -9.2992      | 0.00000145 |
| 1367479_at   | LOC691534            | -9.2999      | 0.00000145 |
| 1371967_at   | Mrpl16               | -9.3043      | 0.00000145 |
| 1376071_at   | NA                   | 9.2979       | 0.00000145 |
| 1390320_at   | Centg2_predicted     | 9.294        | 0.00000146 |
| 1371921_at   | Catna1               | 9.2846       | 0.00000147 |
| 1380688_at   | Galnt14_predicted    | 9.2893       | 0.00000147 |
| 1388849_at   | LOC680423            | -9.2867      | 0.00000147 |
| 1389310_at   | NA                   | 9.2857       | 0.00000147 |
| 1367790_at   | Snd1                 | 9.2897       | 0.00000147 |
| 1396019_at   | NA                   | 9.2771       | 0.00000148 |
| 1387875_at   | Ptk2                 | 9.2786       | 0.00000148 |
| 1388870_at   | RGD1560397_predicted | 9.2812       | 0.00000148 |
| 1368955_at   | Cask                 | 9.2661       | 0.0000015  |
| 1371908_at   | Nxt1_predicted       | -9.2699      | 0.0000015  |
| 1390208_at   | Htatip2_predicted    | -9.2563      | 0.00000151 |
| 1383561_at   | Lig4_predicted       | -9.2567      | 0.00000151 |
| 1375551_at   | MGC94720             | -9.2617      | 0.00000151 |
| 1383511_at   | NA                   | 9.2559       | 0.00000151 |
| 1392973_at   | Nav2                 | 9.2576       | 0.00000151 |
| 1376804_at   | RGD1560646_predicted | 9.2584       | 0.00000151 |
| 1386906_a_at |                      | 40057 9.2474 | 0.00000152 |
| 1378634_at   | Hdac8_predicted      | 9.2481       | 0.00000152 |
| 1367636_at   | Igf2r                | 9.25         | 0.00000152 |
| 1379307_at   | Sap1                 | 9.2485       | 0.00000152 |
| 1388369_at   | Tmed9                | -9.2506      | 0.00000152 |
| 1391461_at   | RGD1306576_predicted | -9.2435      | 0.00000153 |
| 1376797_at   | Csrp2bp_predicted    | -9.235       | 0.00000155 |
| 1374025_at   | Nmnat3               | 9.2363       | 0.00000155 |

|              |                        |             |              |
|--------------|------------------------|-------------|--------------|
| 1388345_at   | NA                     | " -10.7699" | "0.00005407" |
| 1378057_at   | "Flrt3_predicted"      | " 10.7630"  | "0.00005464" |
| 1367898_at   | "Bnip3l"               | " 10.7565"  | "0.00005518" |
| 1374604_at   | NA                     | " 10.7552"  | "0.00005529" |
| 1370036_at   | "Suox"                 | " -10.7538" | "0.00005541" |
| 1375337_at   | "Adam9"                | " -10.7470" | "0.00005598" |
| 1395595_at   | "Mki67ip"              | " -10.7426" | "0.00005636" |
| 1367705_at   | "Glr1"                 | " 10.7409"  | "0.00005651" |
| 1383222_at   | "LOC257646"            | " -10.7341" | "0.00005709" |
| 1398839_at   | "Txn1"                 | " 10.7305"  | "0.00005741" |
| 1383574_at   | "Man1a_predicted"      | " 10.7266"  | "0.00005774" |
| 1374031_at   | "RGD1310937_predicted" | " -10.7107" | "0.00005916" |
| 1378675_at   | "RGD1561831_predicted" | " -10.7082" | "0.00005938" |
| 1382429_at   | NA                     | " 10.7028"  | "0.00005987" |
| 1383616_at   | "RGD1560373_predicted" | " 10.6985"  | "0.00006026" |
| 1369310_at   | "Basp1"                | " 10.6983"  | "0.00006029" |
| 1373984_at   | NA                     | " 10.6944"  | "0.00006064" |
| 1373377_at   | "Scnm1_predicted"      | " -10.6915" | "0.00006092" |
| 1382344_at   | NA                     | " -10.6842" | "0.00006159" |
| 1380960_at   | "Coro2a"               | " 10.6833"  | "0.00006168" |
| 1367824_at   | "Fnta"                 | " -10.6797" | "0.00006202" |
| 1388039_a_at | "Gabbr1"               | " -10.6792" | "0.00006206" |
| 1385581_at   | NA                     | " 10.6757"  | "0.00006239" |
| 1381229_at   | "Prdm2"                | " -10.6624" | "0.00006367" |
| 1371559_at   | NA                     | " 10.6520"  | "0.00006470" |
| 1389654_at   | "Pls1_predicted"       | " 10.6516"  | "0.00006473" |
| 1373413_at   | "RGD1310481_predicted" | " 10.6398"  | "0.00006592" |
| 1374471_at   | "LOC498972"            | " -10.6397" | "0.00006592" |
| 1390193_at   | NA                     | " 10.6393"  | "0.00006596" |
| 1386280_at   | "Mettl7b"              | " 10.6270"  | "0.00006722" |
| 1371997_at   | "Akr1e1"               | " 10.6052"  | "0.00006950" |
| 1367693_at   | "Ywhah"                | " -10.5961" | "0.00007048" |
| 1393048_at   | "Adra2a"               | " 10.5928"  | "0.00007083" |
| 1374758_at   | NA                     | " 10.5887"  | "0.00007128" |
| 1399137_at   | NA                     | " -10.5784" | "0.00007242" |
| 1390201_at   | "Rap1a"                | " -10.5713" | "0.00007321" |
| 1372779_at   | "B3gnt1_predicted"     | " -10.5683" | "0.00007355" |
| 1370245_at   | "Ctsl"                 | " -10.5618" | "0.00007429" |
| 1383833_at   | "LOC500991"            | " -10.5542" | "0.00007516" |
| 1370182_at   | "Ptrn2"                | " 10.5412"  | "0.00007668" |
| 1388429_at   | "LOC499391"            | " -10.5398" | "0.00007684" |
| 1368748_at   | "Tesk2"                | " -10.5205" | "0.00007916" |
| 1387886_at   | "Prep"                 | " -10.5176" | "0.00007952" |
| 1387780_at   | "Dnaja2"               | " -10.5090" | "0.00008057" |
| 1372463_at   | "Fcho2_predicted"      | " 10.5047"  | "0.00008111" |
| 1383905_at   | "Zip216_predicted"     | " -10.5024" | "0.00008140" |
| 1368063_a_at | "Yt521"                | " -10.5024" | "0.00008141" |
| 1389883_at   | "RGD1563224_predicted" | " 10.5020"  | "0.00008145" |
| 1381381_at   | "Mnab_predicted"       | " -10.5014" | "0.00008153" |
| 1389399_at   | "RGD1562218"           | " -10.4998" | "0.00008174" |

|              |                      |         |            |
|--------------|----------------------|---------|------------|
| 1385043_at   | RGD1565362_predicted | 9.2278  | 0.00000156 |
| 1383283_at   | Ocll                 | 9.2252  | 0.00000157 |
| 1373619_at   | Ankrd10              | 9.2168  | 0.00000158 |
| 1398793_at   | Cdc5l                | -9.2174 | 0.00000158 |
| 1376692_at   | Hipk2_predicted      | 9.2166  | 0.00000158 |
| 1392498_at   | LOC691318            | 9.2172  | 0.00000158 |
| 1379322_at   | Psmf7_predicted      | -9.2165 | 0.00000158 |
| 1384728_at   | Ches1_predicted      | 9.2121  | 0.00000159 |
| 1387782_at   | Dynll2               | -9.21   | 0.00000159 |
| 1371386_at   | RGD1306643_predicted | 9.2099  | 0.00000159 |
| 1380319_at   | Tex10_predicted      | -9.2066 | 0.00000159 |
| 1372556_at   | LOC502374            | -9.1971 | 0.00000161 |
| 1383695_at   | Vipr1                | 9.2002  | 0.00000161 |
| 1370912_at   | Hspa1b               | -9.1894 | 0.00000162 |
| 1368249_at   | Klf15                | 9.1935  | 0.00000162 |
| 1386586_at   | MGC125015            | -9.1917 | 0.00000162 |
| 1390867_at   | NA                   | -9.187  | 0.00000162 |
| 1374197_at   | NA                   | 9.1915  | 0.00000162 |
| 1398392_at   | NA                   | 9.1918  | 0.00000162 |
| 1376678_at   | RGD1562438_predicted | 9.1904  | 0.00000162 |
| 1372221_at   | NA                   | 9.1814  | 0.00000163 |
| 1392980_at   | Tiam1                | 9.1774  | 0.00000164 |
| 1398606_at   | Golph4               | 9.1634  | 0.00000168 |
| 1367736_at   | Rraga                | -9.1604 | 0.00000168 |
| 1367715_at   | Tnfrsf1a             | -9.1618 | 0.00000168 |
| 1374312_at   | Uck1_predicted       | -9.1622 | 0.00000168 |
| 1390977_at   | St7l                 | 9.1524  | 0.0000017  |
| 1388907_at   | RGD1306053           | -9.1456 | 0.00000171 |
| 1397854_at   | NA                   | 9.1437  | 0.00000172 |
| 1377457_a_at | Sorl1_predicted      | 9.1412  | 0.00000172 |
| 1386379_at   | NA                   | 9.1223  | 0.00000177 |
| 1368818_at   | Psme4                | 9.1205  | 0.00000177 |
| 1373958_at   | LOC367902            | -9.1174 | 0.00000178 |
| 1375432_at   | LOC679140            | -9.1175 | 0.00000178 |
| 1371569_at   | NA                   | 9.1145  | 0.00000178 |
| 1390351_at   | NA                   | 9.1186  | 0.00000178 |
| 1393713_at   | Gmfs                 | 9.1114  | 0.00000179 |
| 1393661_at   | NA                   | 9.11    | 0.00000179 |
| 1398450_at   | NA                   | 9.1113  | 0.00000179 |
| 1378740_at   | Rasal2_predicted     | 9.1092  | 0.00000179 |
| 1393615_at   | RGD1561030_predicted | 9.104   | 0.0000018  |
| 1388131_at   | Tubb2b               | -9.0984 | 0.00000181 |
| 1395544_at   | NA                   | -9.0963 | 0.00000182 |
| 1389760_at   | Pcgf6                | -9.0952 | 0.00000182 |
| 1385798_at   | NA                   | 9.0855  | 0.00000184 |
| 1371202_a_at | Nfib                 | 9.0799  | 0.00000186 |
| 1399080_at   | LOC688495            | -9.0669 | 0.00000189 |
| 1384239_at   | LOC680133            | 9.0646  | 0.0000019  |
| 1372075_at   | LOC362264            | -9.0608 | 0.00000191 |
| 1368889_at   | Vti1a                | 9.0615  | 0.00000191 |

|            |                        |             |              |
|------------|------------------------|-------------|--------------|
| 1371468_at | "LOC312502"            | " -10.4939" | "0.00008249" |
| 1378134_at | "Atp8b1_predicted"     | " 10.4924"  | "0.00008268" |
| 1367974_at | "Anxa3"                | " -10.4910" | "0.00008285" |
| 1392789_at | "LOC501039"            | " -10.4871" | "0.00008335" |
| 1389602_at | NA                     | " 10.4827"  | "0.00008392" |
| 1367701_at | "Ramp2"                | " -10.4801" | "0.00008426" |
| 1376715_at | "Cbara1"               | " 10.4795"  | "0.00008434" |
| 1386721_at | "Zfp503_predicted"     | " 10.4720"  | "0.00008531" |
| 1385676_at | "Cd2bp2_predicted"     | " -10.4708" | "0.00008548" |
| 1392488_at | "RGD1307915_predicted" | " -10.4705" | "0.00008552" |
| 1376132_at | "LOC362129"            | " 10.4687"  | "0.00008575" |
| 1373064_at | "Dnajc15_predicted"    | " 10.4602"  | "0.00008690" |
| 1379987_at | "RGD1304595_predicted" | " -10.4594" | "0.00008700" |
| 1383689_at | "B4galt4"              | " -10.4567" | "0.00008737" |
| 1388159_at | NA                     | " 10.4557"  | "0.00008750" |
| 1390520_at | "LOC680216"            | " 10.4503"  | "0.00008824" |
| 1387448_at | "Bet1l"                | " -10.4479" | "0.00008856" |
| 1377102_at | "Tmem63a_predicted"    | " -10.4378" | "0.00008996" |
| 1389207_at | "Egln1"                | " 10.4365"  | "0.00009015" |
| 1375685_at | "Tcfcp2l1_predicted"   | " 10.4357"  | "0.00009025" |
| 1382909_at | NA                     | " -10.4311" | "0.00009090" |
| 1379877_at | "Zfp406_predicted"     | " 10.4274"  | "0.00009142" |
| 1374191_at | "Rhbf1"                | " 10.4269"  | "0.00009149" |
| 1398811_at | "Jtb"                  | " -10.4203" | "0.00009243" |
| 1383839_at | "Spg20"                | " -10.4181" | "0.00009275" |
| 1370251_at | "Avpi1"                | " -10.4114" | "0.00009372" |
| 1393661_at | NA                     | " 10.4099"  | "0.00009394" |
| 1394228_at | NA                     | " 10.4086"  | "0.00009413" |
| 1393452_at | "Car9_predicted"       | " 10.4045"  | "0.00009474" |
| 1393201_at | "RGD1562062_predicted" | " -10.4044" | "0.00009474" |
| 1394522_at | NA                     | " -10.4025" | "0.00009503" |
| 1395663_at | "Mall"                 | " 10.4013"  | "0.00009520" |
| 1376619_at | "RGD1561090_predicted" | " 10.3995"  | "0.00009547" |
| 1385072_at | "Galm"                 | " 10.3988"  | "0.00009557" |
| 1374486_at | "Arhgef11"             | " 10.3899"  | "0.00009690" |
| 1382351_at | "Gem_predicted"        | " 10.3879"  | "0.00009721" |
| 1374095_at | "Slc4a8"               | " 10.3733"  | "0.00009945" |
| 1374594_at | "LOC363060"            | " 10.3656"  | "0.00010064" |
| 1393747_at | "Spink4"               | " 10.3617"  | "0.00010126" |
| 1391707_at | "LOC691923"            | " 10.3616"  | "0.00010127" |
| 1388584_at | NA                     | " -10.3602" | "0.00010149" |
| 1383952_at | "Mical1_predicted"     | " -10.3507" | "0.00010301" |
| 1376200_at | "MGC72974"             | " 10.3401"  | "0.00010472" |
| 1371002_at | "Pdcd2"                | " -10.3400" | "0.00010475" |
| 1372845_at | "Rpp21"                | " -10.3397" | "0.00010479" |
| 1380249_at | NA                     | " -10.3348" | "0.00010559" |
| 1393184_at | NA                     | " -10.3125" | "0.00010935" |
| 1373132_at | "LOC691898"            | " -10.3057" | "0.00011052" |
| 1370506_at | "Coq7"                 | " 10.3036"  | "0.00011088" |
| 1389941_at | "Arl2bp"               | " -10.2974" | "0.00011196" |

|            |                      |         |            |
|------------|----------------------|---------|------------|
| 1370325_at | Gorasp2              | -9.0567 | 0.00000192 |
| 1389384_at | Hrppap20             | -9.0545 | 0.00000192 |
| 1398952_at | RGD1564093_predicted | -9.0524 | 0.00000192 |
| 1398299_at | Arhgef11             | 9.047   | 0.00000193 |
| 1374466_at | NA                   | 9.048   | 0.00000193 |
| 1379312_at | Pprc1_predicted      | -9.0482 | 0.00000193 |
| 1371024_at | Cutl1                | 9.0384  | 0.00000196 |
| 1392421_at | Baz2b_predicted      | 9.0316  | 0.00000197 |
| 1372392_at | NA                   | 9.0309  | 0.00000197 |
| 1378467_at | NA                   | 9.0348  | 0.00000197 |
| 1373030_at | NA                   | -9.0281 | 0.00000198 |
| 1390289_at | RGD1311375_predicted | 9.0257  | 0.00000198 |
| 1396901_at | RGD1566319_predicted | -9.0254 | 0.00000198 |
| 1396955_at | NA                   | -9.0218 | 0.00000199 |
| 1390949_at | NA                   | 9.0232  | 0.00000199 |
| 1373047_at | Prkci                | 9.0203  | 0.00000199 |
| 1377651_at | Trio                 | 9.0183  | 0.00000199 |
| 1373027_at | NA                   | 9.0136  | 0.00000201 |
| 1388992_at | Ep400                | 9.0065  | 0.00000202 |
| 1382126_at | Ncor1                | 9.0072  | 0.00000202 |
| 1376135_at | Dars2                | 9.001   | 0.00000203 |
| 1398496_at | NA                   | -9.0045 | 0.00000203 |
| 1386059_at | RGD1562346_predicted | 9.0049  | 0.00000203 |
| 1372138_at | Cutl1                | 8.9972  | 0.00000204 |
| 1389200_at | Bysl                 | -8.9949 | 0.00000205 |
| 1398572_at | LOC679672            | -8.9948 | 0.00000205 |
| 1392909_at | NA                   | 8.9936  | 0.00000205 |
| 1382188_at | RGD1311086           | -8.9938 | 0.00000205 |
| 1376291_at | NA                   | -8.9852 | 0.00000207 |
| 1374486_at | Arhgef11             | 8.9795  | 0.00000208 |
| 1396105_at | LOC688133            | 8.981   | 0.00000208 |
| 1373372_at | LOC501282            | -8.976  | 0.00000209 |
| 1371610_at | Tnks_predicted       | 8.977   | 0.00000209 |
| 1372764_at | LOC689601            | -8.9558 | 0.00000216 |
| 1376274_at | Btbd10               | -8.9528 | 0.00000217 |
| 1374397_at | Eif2s2               | -8.9497 | 0.00000217 |
| 1373597_at | Pop7_predicted       | -8.9512 | 0.00000217 |
| 1377884_at | RGD1560155_predicted | 8.9469  | 0.00000218 |
| 1373200_at | Eef1e1_predicted     | -8.9428 | 0.00000219 |
| 1386569_at | LOC294560            | 8.9341  | 0.00000222 |
| 1388117_at | Snrpb                | -8.9322 | 0.00000222 |
| 1373682_at | Ddx51_predicted      | -8.927  | 0.00000224 |
| 1367590_at | Ran                  | -8.9248 | 0.00000224 |
| 1392662_at | RGD1566242_predicted | -8.9277 | 0.00000224 |
| 1392744_at | Atg7                 | 8.9193  | 0.00000225 |
| 1371955_at | Mrpl35_predicted     | -8.9208 | 0.00000225 |
| 1392471_at | NA                   | 8.919   | 0.00000225 |
| 1392044_at | NA                   | 8.9149  | 0.00000226 |
| 1389908_at | NA                   | 8.9149  | 0.00000226 |
| 1376578_at | Ehmt1_predicted      | 8.9081  | 0.00000227 |

|              |                        |             |              |
|--------------|------------------------|-------------|--------------|
| 1375452_at   | "Mgea6_predicted"      | " 10.2892"  | "0.00011340" |
| 1385701_at   | NA                     | " -10.2811" | "0.00011485" |
| 1383688_at   | NA                     | " -10.2783" | "0.00011537" |
| 1370831_at   | "MgII"                 | " 10.2696"  | "0.00011695" |
| 1371857_at   | "Kctd10"               | " -10.2628" | "0.00011820" |
| 1381525_at   | "Enah"                 | " -10.2567" | "0.00011933" |
| 1373763_at   | "Zfp297b"              | " -10.2531" | "0.00012001" |
| 1394681_at   | "Akr1cl1_predicted"    | " -10.2444" | "0.00012167" |
| 1382964_at   | NA                     | " 10.2440"  | "0.00012174" |
| 1369979_at   | "Scap2"                | " 10.2414"  | "0.00012224" |
| 1378402_at   | "Tfcp2l4_predicted"    | " -10.2378" | "0.00012293" |
| 1370465_at   | "Abcb1a"               | " 10.2335"  | "0.00012376" |
| 1388577_at   | NA                     | " -10.2153" | "0.00012737" |
| 1373570_at   | "Npepl1_predicted"     | " 10.2133"  | "0.00012775" |
| 1373027_at   | NA                     | " 10.2051"  | "0.00012942" |
| 1371485_at   | NA                     | " -10.2001" | "0.00013046" |
| 1382439_at   | "Itgb6"                | " 10.1994"  | "0.00013059" |
| 1377994_at   | NA                     | " -10.1971" | "0.00013106" |
| 1372123_at   | "Sdhd_predicted"       | " 10.1925"  | "0.00013202" |
| 1390951_at   | NA                     | " 10.1887"  | "0.00013281" |
| 1368834_at   | "Camk2d"               | " 10.1855"  | "0.00013349" |
| 1370244_at   | "Ctsl"                 | " -10.1808" | "0.00013447" |
| 1386999_at   | "Ywhab"                | " -10.1794" | "0.00013477" |
| 1367551_a_at | "RGD1306410"           | " 10.1739"  | "0.00013595" |
| 1370464_at   | "Abcb1a"               | " 10.1670"  | "0.00013744" |
| 1388311_at   | "Mrfap1"               | " -10.1648" | "0.00013792" |
| 1390832_at   | NA                     | " 10.1624"  | "0.00013844" |
| 1387770_at   | "Ifi271"               | " -10.1611" | "0.00013873" |
| 1380975_at   | NA                     | " 10.1569"  | "0.00013966" |
| 1398799_at   | "Eif4e"                | " -10.1463" | "0.00014201" |
| 1388809_at   | "Smpdl3a"              | " -10.1285" | "0.00014608" |
| 1387521_at   | "Pdcd4"                | " -10.1212" | "0.00014778" |
| 1391333_at   | "Lrrfp2"               | " 10.1193"  | "0.00014821" |
| 1389792_at   | "Solh_predicted"       | " -10.1026" | "0.00015220" |
| 1387218_at   | "Tff3"                 | " -10.1006" | "0.00015268" |
| 1371705_at   | "Vps26"                | " -10.0935" | "0.00015441" |
| 1368513_at   | "Enpep"                | " -10.0865" | "0.00015615" |
| 1393364_at   | "Slc12a8"              | " 10.0844"  | "0.00015665" |
| 1382271_at   | "Rps6ka5_predicted"    | " 10.0816"  | "0.00015737" |
| 1372744_at   | "Pkp4_predicted"       | " 10.0753"  | "0.00015893" |
| 1393912_at   | NA                     | " -10.0739" | "0.00015930" |
| 1371392_at   | "Gpi"                  | " 10.0736"  | "0.00015937" |
| 1373283_at   | "Slc25a3"              | " -10.0616" | "0.00016245" |
| 1370298_at   | "Zfp99"                | " 10.0595"  | "0.00016299" |
| 1388780_at   | "Terf2ip"              | " -10.0547" | "0.00016423" |
| 1374341_at   | "Thap7"                | " -10.0512" | "0.00016515" |
| 1387078_at   | "Inpp4a"               | " -10.0507" | "0.00016528" |
| 1368349_at   | "Fgfbp1"               | " -10.0498" | "0.00016553" |
| 1390382_at   | "RGD1311457_predicted" | " -10.0483" | "0.00016591" |
| 1397146_at   | NA                     | " 10.0468"  | "0.00016631" |

|              |                      |         |            |
|--------------|----------------------|---------|------------|
| 1388709_at   | LOC362703            | -8.9095 | 0.00000227 |
| 1373162_at   | LOC681708            | -8.9108 | 0.00000227 |
| 1384149_at   | RGD1311424_predicted | -8.9128 | 0.00000227 |
| 1379488_at   | Trp53rk_predicted    | -8.9086 | 0.00000227 |
| 1368050_at   | Ccnl1                | -8.8997 | 0.0000023  |
| 1370280_at   | Hprt                 | -8.8951 | 0.00000232 |
| 1395645_at   | Sipa111              | -8.8923 | 0.00000232 |
| 1392274_at   | Pdgfc                | 8.8905  | 0.00000233 |
| 1389277_at   | RGD1306148_predicted | 8.8855  | 0.00000234 |
| 1379778_at   | RGD1307983_predicted | -8.887  | 0.00000234 |
| 1374464_at   | Tfg                  | -8.885  | 0.00000234 |
| 1389262_at   | NA                   | 8.8786  | 0.00000236 |
| 1368072_at   | Btg3                 | -8.8713 | 0.00000238 |
| 1393933_at   | Sorl1_predicted      | 8.8713  | 0.00000238 |
| 1367803_at   | Nup54                | -8.8672 | 0.00000239 |
| 1393605_at   | RGD1565941_predicted | 8.8684  | 0.00000239 |
| 1385342_at   | Twistnb_predicted    | -8.8682 | 0.00000239 |
| 1377842_at   | Twistnb_predicted    | -8.8666 | 0.00000239 |
| 1371390_at   | Tubb2c               | -8.8633 | 0.0000024  |
| 1374694_at   | RGD1559931_predicted | 8.8613  | 0.00000241 |
| 1396834_at   | Braf                 | -8.8568 | 0.00000242 |
| 1382143_at   | Farp1_predicted      | 8.8557  | 0.00000242 |
| 1391017_at   | Farp1_predicted      | 8.851   | 0.00000243 |
| 1383498_at   | NA                   | 8.8532  | 0.00000243 |
| 1381103_a_at | RGD1562579_predicted | -8.8478 | 0.00000244 |
| 1390960_at   | NA                   | -8.8405 | 0.00000247 |
| 1378029_at   | NA                   | 8.8391  | 0.00000247 |
| 1387097_at   | Fut2                 | -8.8366 | 0.00000248 |
| 1373558_at   | NA                   | 8.8301  | 0.0000025  |
| 1378181_at   | Rpp40                | -8.8286 | 0.00000251 |
| 1399014_at   | Vps4a                | -8.8282 | 0.00000251 |
| 1386647_at   | Mtap7_predicted      | 8.8239  | 0.00000252 |
| 1390517_at   | NA                   | 8.8249  | 0.00000252 |
| 1387025_at   | Dync1i1              | 8.8212  | 0.00000253 |
| 1383942_at   | LOC683687            | 8.8129  | 0.00000255 |
| 1389327_at   | Mrpl32_predicted     | -8.8123 | 0.00000255 |
| 1374194_at   | Tmem16c_predicted    | 8.8127  | 0.00000255 |
| 1393458_s_at | RGD1563764_predicted | 8.8056  | 0.00000258 |
| 1383689_at   | B4gal4               | -8.801  | 0.00000259 |
| 1374922_at   | Atpbd1b_predicted    | -8.8001 | 0.0000026  |
| 1398930_at   | Atp6v0b_predicted    | -8.7943 | 0.00000262 |
| 1373539_at   | NA                   | -8.7922 | 0.00000262 |
| 1388437_at   | NA                   | 8.7926  | 0.00000262 |
| 1387411_at   | Ptprk                | 8.7916  | 0.00000262 |
| 1379250_at   | Galm                 | 8.7878  | 0.00000263 |
| 1373643_at   | NA                   | 8.7873  | 0.00000263 |
| 1394568_at   | RGD1563365_predicted | -8.7869 | 0.00000263 |
| 1374376_at   | Rgref_predicted      | 8.7832  | 0.00000264 |
| 1388999_at   | NA                   | 8.78    | 0.00000265 |
| 1389655_at   | RGD1306819           | -8.7817 | 0.00000265 |



|              |                        |            |              |
|--------------|------------------------|------------|--------------|
| 1388581_at   | "Hn1"                  | "-10.0454" | "0.00016669" |
| 1371785_at   | "Tnfrsf12a"            | "-10.0353" | "0.00016940" |
| 1399114_at   | "Gtf2e2_predicted"     | "-10.0323" | "0.00017021" |
| 1367761_at   | "Ndel1"                | "-10.0256" | "0.00017205" |
| 1379041_at   | "Pik3ca"               | "-10.0215" | "0.00017316" |
| 1383307_at   | "MGC114379"            | "-10.0111" | "0.00017605" |
| 1371611_at   | "Ext2_predicted"       | "10.0106"  | "0.00017619" |
| 1369940_at   | "Taldo1"               | "10.0057"  | "0.00017760" |
| 1389613_at   | NA                     | "9.9992"   | "0.00017946" |
| 1367499_at   | "Slc35c1_predicted"    | "9.9940"   | "0.00018096" |
| 1383511_at   | NA                     | "9.9906"   | "0.00018194" |
| 1387812_at   | "Pcsk6"                | "9.9900"   | "0.00018211" |
| 1372067_at   | "Txndc1"               | "-9.9798"  | "0.00018509" |
| 1378508_at   | NA                     | "-9.9761"  | "0.00018619" |
| 1392795_at   | "Sema6a_predicted"     | "-9.9638"  | "0.00018990" |
| 1367901_at   | "Gusb"                 | "-9.9624"  | "0.00019033" |
| 1388888_at   | NA                     | "-9.9622"  | "0.00019039" |
| 1373411_at   | "Eif1b_predicted"      | "-9.9619"  | "0.00019048" |
| 1367803_at   | "Nup54"                | "-9.9607"  | "0.00019085" |
| 1384835_at   | NA                     | "9.9412"   | "0.00019692" |
| 1373209_at   | NA                     | "-9.9411"  | "0.00019693" |
| 1372066_at   | "RGD1310022"           | "-9.9405"  | "0.00019713" |
| 1391582_at   | NA                     | "-9.9402"  | "0.00019722" |
| 1393101_at   | "Fbxl10"               | "-9.9251"  | "0.00020207" |
| 1371544_at   | "LOC681415"            | "-9.9236"  | "0.00020255" |
| 1383283_at   | "Ocri"                 | "9.9164"   | "0.00020492" |
| 1374806_at   | "Sfn_predicted"        | "-9.9149"  | "0.00020543" |
| 1376135_at   | "Dars2"                | "9.9100"   | "0.00020705" |
| 1377281_at   | "Supt16h_predicted"    | "-9.9000"  | "0.00021040" |
| 1381006_at   | "Hgfac"                | "-9.9000"  | "0.00021041" |
| 1399034_at   | "Pcnx"                 | "9.8973"   | "0.00021130" |
| 1388534_at   | "Cdc26"                | "9.8899"   | "0.00021384" |
| 1368021_at   | "Adh1"                 | "-9.8854"  | "0.00021540" |
| 1388979_at   | "Smndc1"               | "-9.8832"  | "0.00021618" |
| 1389529_at   | NA                     | "9.8819"   | "0.00021663" |
| 1387310_at   | "Atp2c2"               | "-9.8767"  | "0.00021846" |
| 1392863_at   | "Flrt3_predicted"      | "9.8757"   | "0.00021881" |
| 1372158_at   | "Lrp16"                | "9.8613"   | "0.00022395" |
| 1379656_a_at | NA                     | "9.8568"   | "0.00022556" |
| 1397107_at   | "RGD1559968_predicted" | "9.8535"   | "0.00022677" |
| 1392603_at   | NA                     | "9.8506"   | "0.00022786" |
| 1389550_at   | "Sh3gl2"               | "9.8452"   | "0.00022984" |
| 1390765_at   | "Wfdc2"                | "-9.8446"  | "0.00023006" |
| 1371521_at   | "LOC683381"            | "-9.8405"  | "0.00023160" |
| 1370181_at   | "Rab4a"                | "9.8380"   | "0.00023254" |
| 1376686_at   | "Tmtc2_predicted"      | "9.8307"   | "0.00023528" |
| 1384980_at   | NA                     | "-9.8264"  | "0.00023692" |
| 1375944_at   | "Acss2_predicted"      | "-9.8201"  | "0.00023936" |
| 1372707_at   | "Rab6a"                | "-9.8094"  | "0.00024355" |
| 1396643_at   | "Capon"                | "-9.8056"  | "0.00024506" |

|              |                      |         |            |
|--------------|----------------------|---------|------------|
| 1372093_at   | Mxi1                 | 8.7763  | 0.00000266 |
| 1371823_at   | Stag2_predicted      | 8.7743  | 0.00000267 |
| 1388810_at   | Abce1                | -8.7701 | 0.00000268 |
| 1387969_at   | Cxcl10               | -8.7688 | 0.00000268 |
| 1388874_at   | Mtss1_predicted      | 8.7698  | 0.00000268 |
| 1367488_at   | RGD1562348_predicted | 8.7654  | 0.0000027  |
| 1367711_at   | Psmc2                | -8.7615 | 0.00000271 |
| 1390838_at   | NA                   | 8.7565  | 0.00000272 |
| 1390468_at   | NA                   | 8.7572  | 0.00000272 |
| 1392653_at   | NA                   | 8.759   | 0.00000272 |
| 1397570_at   | LOC498295            | 8.7532  | 0.00000273 |
| 1367514_at   | LOC361635            | 8.7515  | 0.00000274 |
| 1388587_at   | Ier3                 | -8.744  | 0.00000276 |
| 1380857_at   | NA                   | -8.7441 | 0.00000276 |
| 1390149_at   | Tacc2                | 8.7442  | 0.00000276 |
| 1390338_at   | LOC361646            | 8.7407  | 0.00000277 |
| 1390290_at   | Surf6_predicted      | -8.7409 | 0.00000277 |
| 1368924_at   | Ghr                  | 8.7376  | 0.00000278 |
| 1390893_at   | Tmem69               | -8.7334 | 0.0000028  |
| 1383675_at   | NA                   | -8.7297 | 0.00000281 |
| 1371851_at   | Psmc6                | -8.7297 | 0.00000281 |
| 1376584_at   | NA                   | 8.7274  | 0.00000282 |
| 1390232_at   | RGD1311946           | -8.7256 | 0.00000282 |
| 1385132_at   | NA                   | -8.7156 | 0.00000285 |
| 1392968_at   | NA                   | 8.7161  | 0.00000285 |
| 1381075_at   | NA                   | 8.7189  | 0.00000285 |
| 1395642_at   | Nol9                 | -8.717  | 0.00000285 |
| 1376860_at   | Nritp                | 8.7187  | 0.00000285 |
| 1389013_at   | RGD1308469_predicted | -8.7155 | 0.00000285 |
| 1388136_at   | Timm9                | -8.7143 | 0.00000285 |
| 1388568_at   | Eif3s7               | -8.7045 | 0.00000289 |
| 1382186_a_at | RGD1311086           | -8.7017 | 0.0000029  |
| 1371542_at   | Tuba4                | -8.6955 | 0.00000293 |
| 1372829_at   | Rbm8_predicted       | -8.6889 | 0.00000296 |
| 1383636_at   | NA                   | 8.686   | 0.00000297 |
| 1371893_at   | Col4a3bp_predicted   | 8.6834  | 0.00000298 |
| 1374385_at   | RGD1561319_predicted | -8.679  | 0.000003   |
| 1396187_at   | Ddx21b               | -8.6753 | 0.00000301 |
| 1383627_a_at | Gtf2f1               | -8.6771 | 0.00000301 |
| 1390662_at   | LOC500084            | 8.6711  | 0.00000302 |
| 1373845_at   | LOC688235            | -8.673  | 0.00000302 |
| 1374767_at   | RGD1309592           | 8.6708  | 0.00000302 |
| 1382275_at   | MGC125015            | -8.6657 | 0.00000305 |
| 1380376_at   | NA                   | 8.6552  | 0.0000031  |
| 1382332_at   | Stag2_predicted      | 8.6546  | 0.0000031  |
| 1373054_at   | Cdw92                | 8.6383  | 0.00000318 |
| 1376782_at   | Cdc14a_predicted     | 8.6337  | 0.00000319 |
| 1372732_at   | Itpa                 | -8.634  | 0.00000319 |
| 1378568_a_at | RGD1306228_predicted | -8.6333 | 0.00000319 |
| 1388118_at   | Hibadh               | 8.6322  | 0.0000032  |

|              |                        |            |              |
|--------------|------------------------|------------|--------------|
| 1379085_at   | "RGD1561878_predicted" | " 9.7998"  | "0.00024736" |
| 1392417_s_at | "Trp53rk_predicted"    | " -9.7978" | "0.00024815" |
| 1390530_at   | NA                     | " 9.7975"  | "0.00024830" |
| 1393481_at   | NA                     | " 9.7953"  | "0.00024916" |
| 1382821_at   | "Ppfia3"               | " 9.7951"  | "0.00024927" |
| 1387125_at   | "S100a9"               | " -9.7935" | "0.00024988" |
| 1374518_at   | "Tmem77"               | " -9.7923" | "0.00025039" |
| 1379810_at   | "Scye1"                | " -9.7908" | "0.00025101" |
| 1385182_at   | "Pkp1_predicted"       | " -9.7819" | "0.00025465" |
| 1375706_at   | NA                     | " 9.7799"  | "0.00025547" |
| 1394772_at   | "Tesk2"                | " -9.7783" | "0.00025613" |
| 1380969_at   | "RGD1564670_predicted" | " 9.7775"  | "0.00025649" |
| 1368967_at   | "Eif2b3"               | " -9.7622" | "0.00026294" |
| 1373607_at   | "St3gal3"              | " 9.7582"  | "0.00026464" |
| 1372250_at   | "LOC499941"            | " -9.7559" | "0.00026564" |
| 1371886_at   | "Crat"                 | " 9.7471"  | "0.00026945" |
| 1373900_at   | "Krt2-7"               | " -9.7430" | "0.00027125" |
| 1373719_at   | "Map4k3"               | " 9.7274"  | "0.00027826" |
| 1367504_at   | "Fbxo7"                | " 9.7140"  | "0.00028437" |
| 1399144_at   | "LOC498351"            | " -9.7115" | "0.00028553" |
| 1368586_at   | "Zg16"                 | " 9.7073"  | "0.00028752" |
| 1379725_at   | NA                     | " -9.7062" | "0.00028805" |
| 1390019_at   | "H3f3b"                | " -9.7038" | "0.00028915" |
| 1382384_at   | "MGC114410"            | " 9.7011"  | "0.00029046" |
| 1388356_at   | "S100a16_predicted"    | " -9.7009" | "0.00029056" |
| 1387002_at   | "G10"                  | " -9.6861" | "0.00029766" |
| 1373786_at   | NA                     | " 9.6832"  | "0.00029904" |
| 1379544_at   | "LOC689253"            | " 9.6820"  | "0.00029966" |
| 1368927_at   | "Mbc2"                 | " -9.6814" | "0.00029996" |
| 1388358_at   | "Etfb"                 | " 9.6807"  | "0.00030030" |
| 1395973_at   | "RGD1311640_predicted" | " 9.6716"  | "0.00030479" |
| 1388456_at   | "S100a1"               | " -9.6550" | "0.00031318" |
| 1375368_at   | "RGD1307773_predicted" | " 9.6548"  | "0.00031329" |
| 1384103_at   | "RGD1561416_predicted" | " -9.6531" | "0.00031413" |
| 1373495_at   | "Ube2j1_predicted"     | " -9.6523" | "0.00031458" |
| 1377749_at   | NA                     | " -9.6484" | "0.00031661" |
| 1397729_x_at | "LOC363060"            | " 9.6435"  | "0.00031914" |
| 1381445_at   | "Esrrg"                | " 9.6418"  | "0.00032005" |
| 1369890_at   | "LOC680174"            | " -9.6414" | "0.00032025" |
| 1398905_at   | "Atp6v1g1_predicted"   | " -9.6407" | "0.00032060" |
| 1398857_at   | "Surf1"                | " 9.6323"  | "0.00032504" |
| 1391774_at   | NA                     | " -9.6320" | "0.00032522" |
| 1374126_at   | NA                     | " -9.6271" | "0.00032784" |
| 1388786_at   | NA                     | " -9.6234" | "0.00032983" |
| 1388857_at   | "Sec23b_predicted"     | " -9.6128" | "0.00033561" |
| 1377045_at   | NA                     | " 9.6118"  | "0.00033618" |
| 1367642_at   | "Suclg1"               | " 9.6090"  | "0.00033770" |
| 1373488_at   | NA                     | " -9.6064" | "0.00033918" |
| 1371812_at   | "LOC362855"            | " 9.6057"  | "0.00033959" |
| 1375843_at   | "lds"                  | " 9.6039"  | "0.00034058" |

|              |                        |         |            |
|--------------|------------------------|---------|------------|
| 1367826_at   | Nfe2l2                 | -8.6304 | 0.0000032  |
| 1395707_at   | NA                     | 8.6274  | 0.00000321 |
| 1390271_at   | Plekha6_predicted      | 8.6259  | 0.00000322 |
| 1392991_at   | LOC682902              | -8.62   | 0.00000324 |
| 1377740_at   | NA                     | 8.6222  | 0.00000324 |
| 1370330_at   | Sipa111                | 8.6198  | 0.00000324 |
| 1386935_at   | Nr4a1                  | -8.6179 | 0.00000325 |
| 1381644_at   | NA                     | 8.615   | 0.00000326 |
| 1373603_at   | "RGD1565744_predicted" | -8.6153 | 0.00000326 |
| 1371835_at   | Prkacb                 | 8.6111  | 0.00000327 |
| 1370237_at   | Hadhsc                 | 8.6082  | 0.00000328 |
| 1373924_at   | RGD1306568             | 8.6073  | 0.00000328 |
| 1393193_at   | Rpusd2_predicted       | -8.6093 | 0.00000328 |
| 1379663_at   | Cachd1_predicted       | 8.6     | 0.00000332 |
| 1368031_at   | Nolc1                  | -8.5975 | 0.00000333 |
| 1393478_at   | NA                     | 8.5947  | 0.00000334 |
| 1372077_at   | Strap                  | -8.5937 | 0.00000334 |
| 1399088_at   | Tik2_predicted         | 8.5932  | 0.00000334 |
| 1379396_at   | Elmo1_predicted        | 8.5876  | 0.00000337 |
| 1390576_at   | LOC684233              | -8.5837 | 0.00000339 |
| 1397255_at   | MGC94720               | -8.5823 | 0.00000339 |
| 1390382_at   | "RGD1311457_predicted" | -8.5813 | 0.0000034  |
| 1391526_at   | Kif16b_predicted       | 8.5789  | 0.00000341 |
| 1390865_at   | LOC681395              | 8.5753  | 0.00000341 |
| 1389984_at   | LOC681740              | 8.5761  | 0.00000341 |
| 1388917_at   | Myo1d                  | 8.578   | 0.00000341 |
| 1379352_at   | Pip5k1a                | 8.5731  | 0.00000342 |
| 1389830_at   | Ubtf                   | -8.5705 | 0.00000343 |
| 1369679_a_at | Nfia                   | 8.5645  | 0.00000346 |
| 1367476_at   | Srp14_predicted        | -8.5649 | 0.00000346 |
| 1371444_at   | Lass2                  | -8.5587 | 0.00000349 |
| 1368165_at   | Prps1                  | -8.5509 | 0.00000353 |
| 1368725_at   | Jag1                   | -8.5482 | 0.00000355 |
| 1371633_at   | Ctnnbl1                | 8.5458  | 0.00000356 |
| 1398316_at   | LOC288913              | -8.5451 | 0.00000356 |
| 1389507_at   | Nedd4l                 | 8.5441  | 0.00000356 |
| 1389445_at   | Zfp688_predicted       | -8.5405 | 0.00000358 |
| 1375630_at   | MGC72932               | -8.5382 | 0.00000359 |
| 1373379_at   | Irak1_predicted        | -8.5353 | 0.0000036  |
| 1382428_at   | Tasp1_predicted        | 8.5332  | 0.00000361 |
| 1372681_at   | NA                     | 8.5279  | 0.00000363 |
| 1368400_at   | Timm8a                 | -8.5288 | 0.00000363 |
| 1374225_at   | LOC500700              | 8.5266  | 0.00000364 |
| 1384377_at   | Ddx28_predicted        | -8.5172 | 0.00000368 |
| 1389061_at   | Nsun5_predicted        | -8.5193 | 0.00000368 |
| 1392099_at   | Plcl3_predicted        | 8.5167  | 0.00000368 |
| 1372678_at   | RGD1311283_predicted   | -8.5186 | 0.00000368 |
| 1389765_at   | Nle1_predicted         | -8.5153 | 0.00000369 |
| 1383238_at   | Qtrt1                  | -8.5149 | 0.00000369 |
| 1398977_at   | Ide                    | 8.5103  | 0.00000371 |

|              |                        |            |              |
|--------------|------------------------|------------|--------------|
| 1373381_at   | "Herc4"                | " 9.6037"  | "0.00034070" |
| 1372583_at   | NA                     | " -9.5991" | "0.00034329" |
| 1383626_at   | "RGD1562173_predicted" | " -9.5972" | "0.00034432" |
| 1387823_at   | "Plrg1"                | " -9.5947" | "0.00034578" |
| 1379450_at   | "Ctnb2n1_predicted"    | " -9.5938" | "0.00034627" |
| 1375815_at   | "Ank"                  | " 9.5898"  | "0.00034854" |
| 1372928_at   | NA                     | " 9.5895"  | "0.00034872" |
| 1374621_at   | "Taf1c"                | " -9.5857" | "0.00035093" |
| 1376187_at   | "Slc35d1_predicted"    | " 9.5850"  | "0.00035132" |
| 1392542_at   | "LOC691031"            | " -9.5835" | "0.00035218" |
| 1374190_at   | "Clybl"                | " 9.5772"  | "0.00035588" |
| 1373564_at   | "Hibch"                | " 9.5726"  | "0.00035858" |
| 1388105_at   | "D123"                 | " -9.5722" | "0.00035883" |
| 1380323_at   | "Slk"                  | " -9.5709" | "0.00035958" |
| 1384500_at   | "RGD1305604_predicted" | " 9.5704"  | "0.00035985" |
| 1393615_at   | "RGD1561030_predicted" | " 9.5701"  | "0.00036007" |
| 1374057_at   | "LOC688999"            | " 9.5608"  | "0.00036562" |
| 1398606_at   | "Golp4"                | " 9.5578"  | "0.00036740" |
| 1373892_at   | "Fbxl17_predicted"     | " 9.5447"  | "0.00037542" |
| 1374418_at   | NA                     | " -9.5427" | "0.00037668" |
| 1386929_at   | "Hk1"                  | " -9.5416" | "0.00037740" |
| 1390965_at   | NA                     | " 9.5412"  | "0.00037764" |
| 1370391_at   | "Crabp2"               | " -9.5410" | "0.00037773" |
| 1367876_at   | "Ipo13"                | " -9.5379" | "0.00037968" |
| 1388688_at   | NA                     | " 9.5366"  | "0.00038048" |
| 1371730_at   | "RGD1305466"           | " 9.5252"  | "0.00038776" |
| 1368311_at   | "Mgmt"                 | " -9.5144" | "0.00039475" |
| 1373099_at   | "Pigs"                 | " -9.5087" | "0.00039850" |
| 1385098_at   | NA                     | " 9.5057"  | "0.00040043" |
| 1388703_at   | "Esam"                 | " -9.5057" | "0.00040047" |
| 1392736_at   | NA                     | " 9.5043"  | "0.00040139" |
| 1385138_at   | NA                     | " 9.5014"  | "0.00040331" |
| 1387117_at   | "Zfp265"               | " -9.4998" | "0.00040437" |
| 1391539_at   | NA                     | " -9.4918" | "0.00040975" |
| 1372222_at   | "RGD1311757_predicted" | " -9.4878" | "0.00041247" |
| 1379832_at   | "Polr2d_predicted"     | " -9.4836" | "0.00041536" |
| 1394135_at   | NA                     | " 9.4827"  | "0.00041602" |
| 1393160_at   | NA                     | " 9.4825"  | "0.00041614" |
| 1374834_at   | "Sf3b4"                | " -9.4765" | "0.00042028" |
| 1387253_at   | "Guca2b"               | " -9.4744" | "0.00042174" |
| 1381404_at   | "Mbd1"                 | " -9.4706" | "0.00042446" |
| 1372145_at   | "Tars"                 | " -9.4686" | "0.00042581" |
| 1390790_a_at | NA                     | " -9.4656" | "0.00042799" |
| 1398922_at   | NA                     | " 9.4631"  | "0.00042973" |
| 1395887_at   | "LOC363060"            | " 9.4615"  | "0.00043091" |
| 1374427_at   | "Syt13"                | " -9.4516" | "0.00043806" |
| 1381028_at   | "Slc27a4"              | " 9.4499"  | "0.00043926" |
| 1373944_at   | NA                     | " 9.4448"  | "0.00044300" |
| 1372728_at   | "Sort1"                | " -9.4437" | "0.00044384" |
| 1371336_at   | "Hn1"                  | " -9.4416" | "0.00044538" |

|              |                      |         |            |
|--------------|----------------------|---------|------------|
| 1389434_at   | RGD1308472_predicted | 8.5108  | 0.00000371 |
| 1391062_at   | LOC687694            | 8.5043  | 0.00000374 |
| 1379337_at   | RGD1307883           | -8.501  | 0.00000375 |
| 1372510_at   | Srxn1                | -8.5023 | 0.00000375 |
| 1385953_at   | Mlit3                | 8.4995  | 0.00000376 |
| 1382602_at   | Ctnnb1               | 8.4778  | 0.0000039  |
| 1377692_at   | RGD1565310_predicted | 8.4745  | 0.00000391 |
| 1377597_at   | Arid2_predicted      | 8.4709  | 0.00000393 |
| 1389135_at   | Ctps2                | 8.4717  | 0.00000393 |
| 1374329_at   | NA                   | 8.4661  | 0.00000396 |
| 1375350_at   | NA                   | 8.4607  | 0.00000399 |
| 1386269_x_at | Sorl1_predicted      | 8.458   | 0.000004   |
| 1398384_at   | Exosc9               | -8.4569 | 0.00000401 |
| 1372608_at   | LOC313707            | -8.4472 | 0.00000406 |
| 1367834_at   | Srm                  | -8.4473 | 0.00000406 |
| 1373767_at   | Zfand2a              | -8.4471 | 0.00000406 |
| 1373611_at   | Il17r_predicted      | -8.4424 | 0.00000409 |
| 1371552_at   | NA                   | -8.4402 | 0.0000041  |
| 1373055_at   | NA                   | 8.4399  | 0.0000041  |
| 1372220_at   | NA                   | 8.437   | 0.00000411 |
| 1377287_at   | Mars2_predicted      | -8.4314 | 0.00000415 |
| 1385028_at   | NA                   | -8.4272 | 0.00000417 |
| 1371684_at   | Ndufs4               | -8.4284 | 0.00000417 |
| 1398894_at   | CommD3               | -8.4246 | 0.00000418 |
| 1390448_at   | RGD1308317_predicted | -8.4235 | 0.00000418 |
| 1374279_at   | Scye1                | -8.4247 | 0.00000418 |
| 1391251_at   | NA                   | 8.4225  | 0.00000419 |
| 1388507_at   | Itgb4bp              | -8.416  | 0.00000422 |
| 1372312_at   | Ltv1                 | -8.4156 | 0.00000422 |
| 1371378_at   | Sui1-rs1_predicted   | -8.4172 | 0.00000422 |
| 1373929_at   | Mrps7                | -8.408  | 0.00000427 |
| 1394576_at   | NA                   | 8.4071  | 0.00000427 |
| 1376357_at   | LOC368062            | 8.4051  | 0.00000428 |
| 1398777_at   | Psmb6                | -8.405  | 0.00000428 |
| 1370196_at   | Pias3                | -8.4022 | 0.0000043  |
| 1370025_at   | Pip5k2c              | -8.4006 | 0.0000043  |
| 1373263_at   | LOC690229            | -8.3958 | 0.00000433 |
| 1374082_at   | RGD1311578           | -8.3913 | 0.00000436 |
| 1371828_at   | RGD1310861           | -8.3899 | 0.00000437 |
| 1373352_at   | LOC685385            | -8.3851 | 0.0000044  |
| 1376985_at   | NA                   | -8.3844 | 0.0000044  |
| 1376520_at   | NA                   | 8.3849  | 0.0000044  |
| 1386959_a_at | Map2k5               | 8.3772  | 0.00000444 |
| 1374453_at   | RGD1560871_predicted | -8.3771 | 0.00000444 |
| 1378153_at   | NA                   | 8.3761  | 0.00000445 |
| 1368184_at   | Psmd9                | -8.375  | 0.00000445 |
| 1393320_at   | RGD1310992           | -8.374  | 0.00000445 |
| 1395199_at   | Eif3s1_predicted     | -8.3712 | 0.00000446 |
| 1384087_at   | RGD1561402_predicted | -8.3724 | 0.00000446 |
| 1371565_at   | Txndc12              | -8.3703 | 0.00000447 |

|              |                        |           |              |
|--------------|------------------------|-----------|--------------|
| 1374010_at   | "Lig3"                 | "-9.4398" | "0.00044672" |
| 1392531_at   | NA                     | "-9.4392" | "0.00044718" |
| 1393713_at   | "Gmids"                | "9.4374"  | "0.00044851" |
| 1396090_at   | "RGD1304572_predicted" | "9.4361"  | "0.00044948" |
| 1372647_at   | NA                     | "-9.4335" | "0.00045145" |
| 1390244_at   | "Spats2_predicted"     | "-9.4334" | "0.00045149" |
| 1390208_at   | "Htatip2_predicted"    | "-9.4331" | "0.00045170" |
| 1381449_s_at | "Tgfa"                 | "9.4311"  | "0.00045323" |
| 1377691_at   | "Sec22l1"              | "-9.4268" | "0.00045649" |
| 1380345_at   | NA                     | "9.4233"  | "0.00045912" |
| 1388130_at   | "Epha1_predicted"      | "-9.4142" | "0.00046612" |
| 1370844_at   | "Hnrpf"                | "-9.4045" | "0.00047378" |
| 1385213_at   | "RGD1563207_predicted" | "9.4034"  | "0.00047462" |
| 1369313_at   | "Fhl2"                 | "-9.3997" | "0.00047754" |
| 1371964_at   | "Grsf1"                | "9.3962"  | "0.00048036" |
| 1387885_at   | "Fcgrt"                | "-9.3955" | "0.00048093" |
| 1383382_at   | "LOC681740"            | "9.3874"  | "0.00048743" |
| 1368162_at   | "Cst6"                 | "9.3843"  | "0.00048995" |
| 1398971_at   | "RGD1307929"           | "9.3786"  | "0.00049472" |
| 1378943_at   | "RGD1566072_predicted" | "9.3755"  | "0.00049725" |
| 1370845_at   | "Entpd2"               | "-9.3752" | "0.00049746" |
| 1384164_at   | NA                     | "9.3729"  | "0.00049941" |
| 1368045_at   | "Slc31a1"              | "9.3600"  | "0.00051033" |
| 1367904_at   | "Resp18"               | "9.3573"  | "0.00051259" |
| 1397698_at   | "Fbxl17_predicted"     | "9.3564"  | "0.00051338" |
| 1374180_at   | NA                     | "-9.3541" | "0.00051532" |
| 1371542_at   | "Tuba4a"               | "-9.3517" | "0.00051744" |
| 1391169_at   | "RGD1562562_predicted" | "9.3458"  | "0.00052257" |
| 1371676_at   | "Lass5_predicted"      | "-9.3450" | "0.00052324" |
| 1372882_at   | "RGD1308635_predicted" | "-9.3448" | "0.00052347" |
| 1392952_at   | "LOC619561"            | "9.3386"  | "0.00052889" |
| 1372402_at   | "Nans_predicted"       | "-9.3307" | "0.00053596" |
| 1391585_at   | "LOC690164"            | "-9.3307" | "0.00053598" |
| 1371302_at   | "LOC502663"            | "9.3291"  | "0.00053742" |
| 1373310_at   | NA                     | "9.3247"  | "0.00054141" |
| 1383965_at   | "LOC689116"            | "9.3166"  | "0.00054876" |
| 1367473_at   | "Tomm22"               | "9.3142"  | "0.00055094" |
| 1370019_at   | "Sult1a1"              | "9.3114"  | "0.00055358" |
| 1373620_at   | "RGD1307879_predicted" | "9.3068"  | "0.00055782" |
| 1370153_at   | "Gdf15"                | "-9.3044" | "0.00056016" |
| 1371806_at   | "Dgcr8_predicted"      | "-9.2888" | "0.00057502" |
| 1373845_at   | "LOC688235"            | "-9.2879" | "0.00057587" |
| 1379669_at   | NA                     | "9.2870"  | "0.00057673" |
| 1389115_at   | "Evpl_predicted"       | "-9.2730" | "0.00059047" |
| 1370020_at   | "Slc25a10"             | "9.2714"  | "0.00059208" |
| 1395139_at   | "Kif16b_predicted"     | "9.2706"  | "0.00059283" |
| 1369928_at   | "Acta1"                | "9.2704"  | "0.00059305" |
| 1383332_at   | NA                     | "9.2697"  | "0.00059376" |
| 1369258_at   | "Fut9"                 | "9.2668"  | "0.00059667" |
| 1370287_a_at | "Tpm1"                 | "-9.2653" | "0.00059814" |

|              |                      |         |            |
|--------------|----------------------|---------|------------|
| 1389577_at   | Cirh1a               | -8.3668 | 0.00000448 |
| 1383328_x_at | Pdcd4                | 8.3668  | 0.00000448 |
| 1374177_at   | Taf13_predicted      | -8.367  | 0.00000448 |
| 1371931_at   | Gtf2i                | 8.365   | 0.00000449 |
| 1376687_at   | Usp1                 | -8.3625 | 0.0000045  |
| 1376938_at   | Ppp2r2a              | -8.3605 | 0.00000451 |
| 1395479_at   | Bxdc2                | -8.3551 | 0.00000455 |
| 1373103_at   | Mta2                 | -8.3526 | 0.00000455 |
| 1383228_at   | NA                   | 8.3543  | 0.00000455 |
| 1390755_at   | RGD1563497_predicted | 8.3534  | 0.00000455 |
| 1388710_at   | Rreb1_predicted      | 8.3535  | 0.00000455 |
| 1379660_at   | NA                   | -8.3512 | 0.00000456 |
| 1372902_at   | Alg12_predicted      | -8.3459 | 0.00000457 |
| 1371263_a_at | Camk2d               | 8.3487  | 0.00000457 |
| 1382233_a_at | NA                   | -8.3495 | 0.00000457 |
| 1378106_at   | Phlda2_predicted     | -8.3469 | 0.00000457 |
| 1389659_at   | RGD1565540_predicted | -8.3466 | 0.00000457 |
| 1398517_at   | Ssu72                | -8.3462 | 0.00000457 |
| 1370348_at   | Ninj1                | -8.3448 | 0.00000458 |
| 1372932_at   | Nnp1                 | -8.3394 | 0.00000459 |
| 1372432_at   | Prpf3_predicted      | -8.34   | 0.00000459 |
| 1368403_at   | Rbl2                 | 8.3397  | 0.00000459 |
| 1371952_at   | Rbm18_predicted      | -8.3422 | 0.00000459 |
| 1383874_at   | RGD1560812_predicted | -8.3409 | 0.00000459 |
| 1371885_at   | Ckap1_predicted      | -8.3375 | 0.0000046  |
| 1367827_at   | Ppp2cb               | -8.3386 | 0.0000046  |
| 1389530_at   | NA                   | -8.3319 | 0.00000464 |
| 1372391_at   | RGD1308469_predicted | -8.3311 | 0.00000464 |
| 1390710_x_at | Sorl1_predicted      | 8.3305  | 0.00000464 |
| 1379824_at   | Tox_predicted        | 8.3309  | 0.00000464 |
| 1369962_at   | Atic                 | -8.3281 | 0.00000465 |
| 1370223_at   | Arfrp1               | -8.3247 | 0.00000466 |
| 1373820_at   | RGD1304773           | 8.3261  | 0.00000466 |
| 1381259_at   | Stag1_predicted      | 8.3261  | 0.00000466 |
| 1371324_at   | LOC680891            | -8.322  | 0.00000468 |
| 1367883_at   | Smn1                 | -8.3218 | 0.00000468 |
| 1372759_at   | Cdk9                 | -8.3188 | 0.00000469 |
| 1385513_at   | NA                   | 8.3201  | 0.00000469 |
| 1368277_at   | Ppp3ca               | 8.3163  | 0.00000471 |
| 1379296_at   | NA                   | -8.3128 | 0.00000473 |
| 1376112_a_at | NTF2                 | -8.31   | 0.00000475 |
| 1372950_at   | Bet1l                | -8.3035 | 0.00000477 |
| 1377713_at   | Ches1_predicted      | 8.306   | 0.00000477 |
| 1376935_at   | Hmgn2                | -8.3062 | 0.00000477 |
| 1392615_at   | NA                   | -8.3059 | 0.00000477 |
| 1373933_at   | Rapgef2_predicted    | 8.3035  | 0.00000477 |
| 1393105_at   | RGD1562173_predicted | -8.3056 | 0.00000477 |
| 1387125_at   | S100a9               | -8.3026 | 0.00000477 |
| 1399044_at   | Zfp91                | 8.3048  | 0.00000477 |
| 1388976_at   | RGD1305975_predicted | -8.3017 | 0.00000478 |

|              |                        |            |              |
|--------------|------------------------|------------|--------------|
| 1380168_at   | "Etv4_predicted"       | " -9.2649" | "0.00059863" |
| 1377719_a_at | NA                     | " 9.2640"  | "0.00059947" |
| 1377498_at   | "Ampd2"                | " -9.2569" | "0.00060669" |
| 1373199_at   | "Gla"                  | " -9.2533" | "0.00061044" |
| 1371972_at   | "RGD1563141_predicted" | " -9.2529" | "0.00061085" |
| 1385118_at   | "LOC364604"            | " -9.2523" | "0.00061146" |
| 1372902_at   | "Alg12_predicted"      | " -9.2502" | "0.00061357" |
| 1385342_at   | "Twistnb_predicted"    | " -9.2485" | "0.00061537" |
| 1371663_at   | "RGD1305138_predicted" | " -9.2471" | "0.00061680" |
| 1395275_at   | "Pus7_predicted"       | " -9.2439" | "0.00062011" |
| 1384960_at   | "Citr"                 | " 9.2421"  | "0.00062205" |
| 1373501_at   | "Nek7_predicted"       | " 9.2413"  | "0.00062290" |
| 1370288_a_at | "Tpm1"                 | " -9.2382" | "0.00062616" |
| 1378516_at   | "Rimbp2"               | " 9.2376"  | "0.00062673" |
| 1397854_at   | NA                     | " 9.2375"  | "0.00062691" |
| 1368315_at   | "Entpd6"               | " 9.2364"  | "0.00062799" |
| 1369554_at   | "Syng2"                | " -9.2357" | "0.00062873" |
| 1368490_at   | "Cd14"                 | " -9.2348" | "0.00062973" |
| 1378243_at   | "Tmem17"               | " -9.2332" | "0.00063140" |
| 1382076_at   | "Slc37a1"              | " 9.2326"  | "0.00063206" |
| 1397644_at   | "Mtap_predicted"       | " -9.2282" | "0.00063679" |
| 1374790_at   | "Gnptg"                | " -9.2255" | "0.00063970" |
| 1375910_at   | "Cdc42ep3_predicted"   | " -9.2207" | "0.00064494" |
| 1384926_at   | NA                     | " -9.2187" | "0.00064713" |
| 1397788_at   | "Rimbp2"               | " 9.2179"  | "0.00064792" |
| 1385191_at   | NA                     | " 9.2126"  | "0.00065379" |
| 1371396_at   | NA                     | " -9.2118" | "0.00065465" |
| 1389010_at   | "Lta4h"                | " -9.2112" | "0.00065530" |
| 1383603_at   | NA                     | " 9.2023"  | "0.00066523" |
| 1394871_at   | "Cdc26"                | " 9.2002"  | "0.00066760" |
| 1388868_at   | "Zfp216_predicted"     | " -9.1990" | "0.00066894" |
| 1390155_at   | "Abhd6"                | " 9.1989"  | "0.00066911" |
| 1372764_at   | "LOC689601"            | " -9.1802" | "0.00069065" |
| 1367806_at   | "Gis"                  | " 9.1785"  | "0.00069264" |
| 1369888_at   | "Gcg"                  | " 9.1755"  | "0.00069615" |
| 1393935_at   | "LOC680244"            | " 9.1745"  | "0.00069731" |
| 1375579_at   | "LOC690871"            | " -9.1703" | "0.00070237" |
| 1371811_at   | "Bsc12"                | " -9.1660" | "0.00070749" |
| 1375108_at   | "ND3"                  | " 9.1639"  | "0.00070995" |
| 1368413_at   | "Abp1"                 | " 9.1611"  | "0.00071340" |
| 1379794_at   | "Gzmb"                 | " 9.1582"  | "0.00071692" |
| 1372772_at   | NA                     | " 9.1573"  | "0.00071793" |
| 1376094_at   | "Hint3"                | " 9.1467"  | "0.00073099" |
| 1394136_at   | "Papd1_predicted"      | " -9.1438" | "0.00073463" |
| 1395081_at   | "RGD1566426_predicted" | " 9.1420"  | "0.00073682" |
| 1368599_at   | "Slc9a2"               | " 9.1393"  | "0.00074022" |
| 1393689_at   | "Ndufaf1_predicted"    | " -9.1378" | "0.00074212" |
| 1369736_at   | "Emp1"                 | " 9.1213"  | "0.00076324" |
| 1372395_at   | "RGD1565757_predicted" | " 9.1115"  | "0.00077604" |
| 1374122_at   | "Myo5c_predicted"      | " -9.1099" | "0.00077826" |

|              |                      |         |            |
|--------------|----------------------|---------|------------|
| 1394058_at   | NA                   | 8.2968  | 0.00000481 |
| 1374224_at   | Eif2ak4_predicted    | 8.2932  | 0.00000483 |
| 1383148_at   | NA                   | 8.2943  | 0.00000483 |
| 1390407_at   | Cldnd1               | -8.2907 | 0.00000484 |
| 1383734_at   | RGD1561626_predicted | 8.291   | 0.00000484 |
| 1371383_at   | Drap1_predicted      | -8.2833 | 0.0000049  |
| 1374676_at   | NA                   | 8.2767  | 0.00000495 |
| 1383743_at   | Lrrc16_predicted     | 8.2746  | 0.00000496 |
| 1373551_at   | RGD1309762_predicted | 8.275   | 0.00000496 |
| 1398360_at   | LOC679532            | -8.2731 | 0.00000497 |
| 1388715_at   | Gars                 | -8.2678 | 0.00000501 |
| 1395620_at   | RGD1306302           | -8.2637 | 0.00000504 |
| 1376038_at   | Tex2                 | 8.2618  | 0.00000505 |
| 1383538_at   | NA                   | 8.2541  | 0.0000051  |
| 1372479_at   | NA                   | 8.255   | 0.0000051  |
| 1370188_at   | Sfrs10               | -8.2548 | 0.0000051  |
| 1369956_at   | Ifngr                | -8.2507 | 0.00000513 |
| 1374215_at   | Plekhl1              | -8.2503 | 0.00000513 |
| 1393009_at   | RGD1309326           | -8.2493 | 0.00000513 |
| 1377045_at   | NA                   | 8.2463  | 0.00000515 |
| 1372661_at   | Tbl3                 | -8.2458 | 0.00000515 |
| 1368852_at   | Dnaja1               | -8.2444 | 0.00000516 |
| 1372145_at   | Tars                 | -8.2449 | 0.00000516 |
| 1396239_at   | RGD1566036_predicted | 8.2426  | 0.00000517 |
| 1392922_at   | Rap2b                | -8.2367 | 0.00000521 |
| 1382818_at   | RGD1309752           | 8.2372  | 0.00000521 |
| 1383125_at   | Htf9c                | -8.2334 | 0.00000523 |
| 1399130_at   | LOC502782            | -8.2305 | 0.00000525 |
| 1388165_at   | PORF-2               | 8.2298  | 0.00000525 |
| 1389957_at   | Ttc3_predicted       | 8.2307  | 0.00000525 |
| 1372853_at   | Rela                 | -8.2262 | 0.00000528 |
| 1388582_at   | Psme3                | -8.2245 | 0.00000529 |
| 1387280_a_at | Slc7a5               | -8.2234 | 0.0000053  |
| 1392600_a_at | NA                   | 8.2218  | 0.00000531 |
| 1368552_at   | Grpel1               | -8.2184 | 0.00000533 |
| 1383253_at   | NA                   | -8.2182 | 0.00000533 |
| 1370979_at   | Ddx20                | -8.2119 | 0.00000537 |
| 1390769_at   | LOC314140            | -8.2116 | 0.00000537 |
| 1368262_at   | Phlpp                | 8.2122  | 0.00000537 |
| 1388700_at   | NA                   | 8.2088  | 0.0000054  |
| 1373217_at   | Ehbp1_predicted      | 8.207   | 0.00000541 |
| 1380982_at   | Bcas1                | 8.2     | 0.00000547 |
| 1389790_at   | NA                   | -8.1977 | 0.00000548 |
| 1376842_at   | NA                   | 8.1985  | 0.00000548 |
| 1368977_a_at | Fxc1                 | -8.1962 | 0.00000549 |
| 1393248_at   | Btn2a2_predicted     | -8.1942 | 0.0000055  |
| 1374547_at   | LOC502663            | -8.1919 | 0.00000552 |
| 1389336_at   | Pop5_predicted       | -8.1899 | 0.00000553 |
| 1377503_at   | Riok2                | -8.1881 | 0.00000554 |
| 1383073_at   | Usp14                | -8.1888 | 0.00000554 |

|              |                        |           |              |
|--------------|------------------------|-----------|--------------|
| 1374312_at   | "Uck1_predicted"       | "-9.1081" | "0.00078063" |
| 1398793_at   | "Cdc5l"                | "-9.1071" | "0.00078190" |
| 1367452_at   | "Sumo2"                | "-9.1024" | "0.00078817" |
| 1388920_at   | "Bmp6"                 | "-9.1010" | "0.00079003" |
| 1389039_at   | NA                     | "9.0944"  | "0.00079902" |
| 1372655_at   | NA                     | "9.0871"  | "0.00080898" |
| 1398916_at   | "Aurkaip1"             | "-9.0871" | "0.00080899" |
| 1372075_at   | "LOC362264"            | "-9.0802" | "0.00081867" |
| 1389261_at   | "RGD1305508_predicted" | "-9.0757" | "0.00082497" |
| 1393794_at   | "RGD1565122_predicted" | "9.0684"  | "0.00083521" |
| 1378021_at   | NA                     | "-9.0631" | "0.00084288" |
| 1389667_at   | "LOC683897"            | "9.0623"  | "0.00084400" |
| 1368016_at   | "Pecr"                 | "9.0618"  | "0.00084477" |
| 1394570_at   | NA                     | "9.0597"  | "0.00084777" |
| 1369473_at   | "Pgm1"                 | "9.0567"  | "0.00085216" |
| 1386943_at   | "Plip"                 | "-9.0554" | "0.00085407" |
| 1376051_at   | "Cryl1"                | "9.0538"  | "0.00085632" |
| 1387288_at   | "Neurod1"              | "9.0536"  | "0.00085663" |
| 1380102_at   | "RGD1560964_predicted" | "-9.0519" | "0.00085909" |
| 1367585_a_at | "Atp1a1"               | "9.0460"  | "0.00086790" |
| 1398849_at   | "H3f3b"                | "-9.0411" | "0.00087510" |
| 1395696_at   | "RGD1306613_predicted" | "-9.0396" | "0.00087747" |
| 1376891_at   | NA                     | "9.0342"  | "0.00088553" |
| 1387189_at   | "Slc22a3"              | "9.0320"  | "0.00088891" |
| 1392082_a_at | "Cd7_predicted"        | "9.0312"  | "0.00089006" |
| 1383401_at   | "LOC500040"            | "-9.0287" | "0.00089387" |
| 1372950_at   | "Bet1l"                | "-9.0283" | "0.00089454" |
| 1395533_at   | "Dnd1"                 | "-9.0273" | "0.00089610" |
| 1374006_at   | "Kat3"                 | "9.0166"  | "0.00091268" |
| 1375278_at   | "Trim2"                | "9.0155"  | "0.00091439" |
| 1374415_at   | "Poir3e_predicted"     | "-9.0148" | "0.00091552" |
| 1379363_at   | NA                     | "9.0088"  | "0.00092493" |
| 1394510_at   | NA                     | "9.0077"  | "0.00092666" |
| 1370908_at   | "Hdac2"                | "-9.0023" | "0.00093526" |
| 1367847_at   | "Nupr1"                | "8.9991"  | "0.00094038" |
| 1390492_a_at | "Usp40"                | "8.9898"  | "0.00095566" |
| 1374981_at   | "RGD1311135_predicted" | "-8.9833" | "0.00096625" |
| 1373083_at   | "Ppapdc2"              | "-8.9831" | "0.00096669" |
| 1380909_at   | "Slc25a24_predicted"   | "8.9728"  | "0.00098386" |
| 1387924_at   | "Ngef"                 | "8.9705"  | "0.00098775" |
| 1398364_at   | "RGD1359529"           | "8.9690"  | "0.00099029" |
| 1377019_at   | NA                     | "-8.9659" | "0.00099571" |
| 1371893_at   | "Col4a3bp_predicted"   | "-8.9641" | "0.00099869" |
| 1374582_at   | "Kctd9_predicted"      | "-8.9638" | "0.00099932" |
| 1389923_at   | "Btdb9"                | "8.9619"  | "0.00100257" |
| 1380028_at   | "LOC367311"            | "-8.9613" | "0.00100348" |
| 1372770_at   | NA                     | "8.9609"  | "0.00100427" |
| 1368133_at   | "Mpdz"                 | "8.9597"  | "0.00100626" |
| 1378685_at   | "LOC689836"            | "8.9582"  | "0.00100899" |
| 1375029_at   | NA                     | "-8.9551" | "0.00101440" |

|              |                      |         |            |
|--------------|----------------------|---------|------------|
| 1383384_at   | LOC682988            | 8.1822  | 0.00000559 |
| 1373803_a_at | Ghr                  | 8.1737  | 0.00000567 |
| 1381476_at   | NA                   | 8.1698  | 0.0000057  |
| 1367687_a_at | Pam                  | 8.1684  | 0.00000571 |
| 1392910_at   | Bop1                 | -8.1631 | 0.00000575 |
| 1393264_at   | RGD1564833_predicted | 8.164   | 0.00000575 |
| 1378325_at   | NA                   | 8.1571  | 0.0000058  |
| 1371617_at   | Psm13_predicted      | -8.1585 | 0.0000058  |
| 1386910_a_at | Apex1                | -8.1492 | 0.00000588 |
| 1371980_at   | Atad3a               | -8.1471 | 0.00000588 |
| 1389256_at   | NA                   | 8.1486  | 0.00000588 |
| 1393162_at   | Slc39a6              | -8.1478 | 0.00000588 |
| 1378294_at   | Fbxl12               | -8.1445 | 0.00000589 |
| 1373822_at   | RGD1306356           | -8.1441 | 0.00000589 |
| 1389910_at   | RGD1307399_predicted | -8.1449 | 0.00000589 |
| 1372946_at   | RGD1562747_predicted | -8.1441 | 0.00000589 |
| 1378492_at   | Farp1_predicted      | 8.1398  | 0.00000593 |
| 1373191_at   | Rab34                | 8.1391  | 0.00000593 |
| 1393088_at   | Rg9mtd1              | -8.1378 | 0.00000594 |
| 1373249_at   | NA                   | -8.1355 | 0.00000596 |
| 1377198_at   | NA                   | 8.1345  | 0.00000596 |
| 1398353_at   | Sar1a                | -8.1337 | 0.00000596 |
| 1389545_at   | Tbl1xr1_predicted    | 8.1347  | 0.00000596 |
| 1371846_at   | Phgdh1               | 8.13    | 0.00000599 |
| 1375045_at   | LOC690751            | 8.1251  | 0.00000604 |
| 1398708_at   | Glrp1_predicted      | 8.1144  | 0.00000614 |
| 1385517_at   | Gtf2i                | 8.1145  | 0.00000614 |
| 1393154_at   | NA                   | -8.1135 | 0.00000614 |
| 1373851_at   | NA                   | 8.114   | 0.00000614 |
| 1369630_at   | Adk                  | 8.1117  | 0.00000616 |
| 1382187_at   | RGD1311086           | -8.1106 | 0.00000616 |
| 1393033_at   | Yars2                | -8.107  | 0.00000619 |
| 1370932_at   | Lrp4                 | 8.1036  | 0.00000623 |
| 1387199_a_at | Arhgef9              | 8.0988  | 0.00000627 |
| 1367701_at   | Ramp2                | -8.096  | 0.00000628 |
| 1388646_at   | RGD1311784_predicted | 8.0958  | 0.00000628 |
| 1371410_at   | RGD1564058_predicted | -8.0971 | 0.00000628 |
| 1369979_at   | Scap2                | 8.0978  | 0.00000628 |
| 1376519_at   | Brp16                | -8.0944 | 0.00000629 |
| 1376715_at   | Cbara1               | 8.0915  | 0.00000632 |
| 1378543_at   | Hnrpa2b1_predicted   | -8.0888 | 0.00000634 |
| 1373612_at   | NA                   | 8.0867  | 0.00000636 |
| 1373284_at   | Sav1_predicted       | -8.0824 | 0.0000064  |
| 1372149_at   | Auh_predicted        | 8.0796  | 0.00000642 |
| 1368980_at   | Pice1                | 8.0802  | 0.00000642 |
| 1397685_at   | NA                   | 8.0787  | 0.00000643 |
| 1367579_a_at | Tuba6                | -8.078  | 0.00000643 |
| 1389127_at   | Smad3                | 8.0755  | 0.00000645 |
| 1388397_at   | Ebna1bp2             | -8.0718 | 0.00000649 |
| 1379327_at   | Smarca5_predicted    | -8.0689 | 0.00000652 |

|              |                        |           |              |
|--------------|------------------------|-----------|--------------|
| 1374945_at   | "RGD1359191"           | "-8.9529" | "0.00101824" |
| 1370538_at   | "Lama3"                | "8.9406"  | "0.00104002" |
| 1375144_at   | NA                     | "-8.9395" | "0.00104196" |
| 1395544_at   | NA                     | "-8.9380" | "0.00104459" |
| 1394705_at   | NA                     | "8.9358"  | "0.00104854" |
| 1367938_at   | "Ugdh"                 | "8.9307"  | "0.00105781" |
| 1373748_at   | "Pdzn3_predicted"      | "8.9273"  | "0.00106407" |
| 1373702_at   | "L3mbtl2"              | "-8.9262" | "0.00106609" |
| 1388180_at   | "Phax"                 | "-8.9220" | "0.00107391" |
| 1383231_at   | "Snip1"                | "-8.9200" | "0.00107755" |
| 1379521_at   | "Alg3"                 | "-8.9101" | "0.00109620" |
| 1394390_at   | NA                     | "-8.9041" | "0.00110763" |
| 1376085_at   | "RGD1563037_predicted" | "-8.9038" | "0.00110811" |
| 1378171_at   | "Nrp2"                 | "8.9013"  | "0.00111294" |
| 1372608_at   | "LOC313707"            | "-8.9008" | "0.00111398" |
| 1373315_at   | "Arnt2"                | "8.8994"  | "0.00111664" |
| 1382007_at   | "Sh3glb1"              | "-8.8975" | "0.00112030" |
| 1381103_a_at | "RGD1562579_predicted" | "-8.8965" | "0.00112221" |
| 1373228_at   | "RGD1560755_predicted" | "-8.8948" | "0.00112552" |
| 1382094_at   | NA                     | "8.8910"  | "0.00113300" |
| 1385128_at   | NA                     | "8.8904"  | "0.00113416" |
| 1378257_at   | "Trex1"                | "-8.8893" | "0.00113621" |
| 1380815_at   | "LOC304923"            | "8.8877"  | "0.00113945" |
| 1372678_at   | "RGD1311283_predicted" | "-8.8870" | "0.00114086" |
| 1372763_at   | "RGD1307879_predicted" | "8.8823"  | "0.00115009" |
| 1380472_at   | "LOC683587"            | "8.8765"  | "0.00116178" |
| 1371786_at   | "Trim35"               | "8.8765"  | "0.00116180" |
| 1389003_at   | "RGD1563286_predicted" | "-8.8764" | "0.00116201" |
| 1383938_at   | "RGD1566426_predicted" | "8.8682"  | "0.00117855" |
| 1384262_at   | "Ppp1r3b"              | "-8.8679" | "0.00117926" |
| 1379271_at   | "RGD1564914_predicted" | "-8.8663" | "0.00118237" |
| 1397924_at   | NA                     | "-8.8661" | "0.00118291" |
| 1371552_at   | NA                     | "-8.8659" | "0.00118328" |
| 1384887_at   | "Slc5a10_predicted"    | "8.8624"  | "0.00119035" |
| 1391109_x_at | NA                     | "8.8607"  | "0.00119394" |
| 1373986_at   | NA                     | "8.8602"  | "0.00119509" |
| 1385109_at   | "Josd3"                | "-8.8601" | "0.00119513" |
| 1368209_at   | "Pdzk1ip1"             | "-8.8578" | "0.00119996" |
| 1391134_at   | "Tmco3_predicted"      | "-8.8487" | "0.00121904" |
| 1371353_at   | "Sqstm1"               | "-8.8445" | "0.00122799" |
| 1372498_at   | "Ciapin1"              | "-8.8426" | "0.00123202" |
| 1374420_at   | "RGD1308874"           | "-8.8408" | "0.00123587" |
| 1370074_at   | "Baia2"                | "-8.8371" | "0.00124394" |
| 1382188_at   | "RGD1311086"           | "-8.8361" | "0.00124593" |
| 1379293_at   | "Gzma"                 | "8.8276"  | "0.00126450" |
| 1372409_at   | "Mad21bp"              | "-8.8256" | "0.00126884" |
| 1392468_at   | "RGD1310950_predicted" | "-8.8256" | "0.00126895" |
| 1372104_at   | "Tmbim1"               | "8.8192"  | "0.00128319" |
| 1373961_at   | "MGC95208"             | "-8.8191" | "0.00128344" |
| 1371311_at   | "Sdhc"                 | "8.8180"  | "0.00128591" |

|            |                      |         |            |
|------------|----------------------|---------|------------|
| 1379402_at | Abcc4                | 8.0666  | 0.00000654 |
| 1380690_at | NA                   | 8.0661  | 0.00000654 |
| 1379815_at | LOC679869            | 8.0621  | 0.00000658 |
| 1388575_at | NA                   | 8.0577  | 0.00000661 |
| 1374437_at | Nars                 | -8.0584 | 0.00000661 |
| 1372009_at | Yars                 | -8.0589 | 0.00000661 |
| 1387087_at | Cebpb                | -8.0558 | 0.00000662 |
| 1374890_at | Ube2d2               | 8.0496  | 0.00000669 |
| 1371363_at | Gpd1                 | -8.0479 | 0.00000671 |
| 1390118_at | RGD1307679           | -8.0449 | 0.00000673 |
| 1378958_at | MGC94720             | -8.0442 | 0.00000674 |
| 1393813_at | Ttc3_predicted       | 8.0379  | 0.00000681 |
| 1387871_at | Cfl1                 | -8.0357 | 0.00000682 |
| 1390036_at | Slc16a6              | -8.0362 | 0.00000682 |
| 1377183_at | Wwox_predicted       | 8.0297  | 0.00000689 |
| 1384330_at | LOC303067            | -8.0242 | 0.00000695 |
| 1399096_at | NA                   | 8.0218  | 0.00000697 |
| 1370311_at | Eif2b1               | -8.0167 | 0.00000702 |
| 1399023_at | Ric8a                | -8.0169 | 0.00000702 |
| 1389496_at | Akap7                | 8.0107  | 0.00000708 |
| 1373076_at | NA                   | 8.0117  | 0.00000708 |
| 1387074_at | Rgs2                 | -8.0091 | 0.0000071  |
| 1387048_at | Ddx39                | -8.007  | 0.00000712 |
| 1393186_at | RGD1564454_predicted | -8.0065 | 0.00000712 |
| 1394643_at | NA                   | -8.0048 | 0.00000713 |
| 1382161_at | Mphosph10_predicted  | -8.0041 | 0.00000714 |
| 1372497_at | Nbr1                 | 8.0007  | 0.00000717 |
| 1371730_at | RGD1305466           | 8.0012  | 0.00000717 |
| 1380431_at | RGD1308772_predicted | 7.9996  | 0.00000717 |
| 1375845_at | RGD1562920_predicted | 7.9995  | 0.00000717 |
| 1377263_at | Havcr2               | -7.9968 | 0.0000072  |
| 1374415_at | Polr3e_predicted     | -7.9875 | 0.00000731 |
| 1375404_at | Strbp                | 7.987   | 0.00000731 |
| 1374569_at | Grwd1                | -7.986  | 0.00000732 |
| 1383574_at | Man1a_predicted      | 7.9843  | 0.00000733 |
| 1367495_at | RGD1560211_predicted | -7.9808 | 0.00000737 |
| 1371645_at | Sdf2_predicted       | -7.9731 | 0.00000746 |
| 1375956_at | Mnat1                | 7.971   | 0.00000748 |
| 1371839_at | Sfrs2                | -7.9715 | 0.00000748 |
| 1372099_at | LOC297530            | 7.9697  | 0.00000749 |
| 1398976_at | Ncor1                | 7.9599  | 0.00000761 |
| 1370353_at | Timm22               | -7.9595 | 0.00000761 |
| 1372179_at | Hpcal1               | 7.9574  | 0.00000762 |
| 1376194_at | NA                   | 7.957   | 0.00000762 |
| 1389622_at | RGD1565889_predicted | 7.9572  | 0.00000762 |
| 1370978_at | Scamp1               | 7.9589  | 0.00000762 |
| 1373708_at | MGC125034            | -7.9559 | 0.00000763 |
| 1387924_at | Ngef_predicted       | 7.9528  | 0.00000766 |
| 1376279_at | Pop1_predicted       | -7.9527 | 0.00000766 |
| 1368049_at | Tcp1                 | -7.9524 | 0.00000766 |

|              |                        |            |              |
|--------------|------------------------|------------|--------------|
| 1387505_at   | "Gnai1"                | " 8.8119"  | "0.00129952" |
| 1383232_at   | NA                     | " -8.8116" | "0.00130020" |
| 1383189_at   | NA                     | " 8.8114"  | "0.00130075" |
| 1376945_at   | NA                     | " 8.8091"  | "0.00130580" |
| 1396561_x_at | "Piga"                 | " -8.8022" | "0.00132159" |
| 1368187_at   | "Gpnmb"                | " -8.8008" | "0.00132493" |
| 1386410_at   | NA                     | " -8.7982" | "0.00133079" |
| 1374694_at   | "RGD1559931_predicted" | " 8.7973"  | "0.00133293" |
| 1374767_at   | "RGD1309592"           | " 8.7965"  | "0.00133487" |
| 1383372_at   | "Ptafr"                | " 8.7962"  | "0.00133546" |
| 1397223_at   | "RGD1565609_predicted" | " -8.7913" | "0.00134707" |
| 1390456_at   | NA                     | " 8.7900"  | "0.00134997" |
| 1377541_at   | "LOC500726"            | " -8.7896" | "0.00135087" |
| 1390688_at   | "Ddx50"                | " -8.7895" | "0.00135117" |
| 1388669_at   | "Sf3a3"                | " -8.7888" | "0.00135278" |
| 1390395_at   | NA                     | " 8.7766"  | "0.00138186" |
| 1369982_at   | "Ap2a2"                | " 8.7732"  | "0.00139019" |
| 1392818_at   | "Gas5"                 | " -8.7684" | "0.00140173" |
| 1390069_at   | NA                     | " 8.7663"  | "0.00140694" |
| 1372389_at   | "Ier2"                 | " -8.7645" | "0.00141133" |
| 1373003_at   | "Sart3_predicted"      | " -8.7626" | "0.00141612" |
| 1382835_at   | NA                     | " 8.7594"  | "0.00142389" |
| 1371703_at   | "Ahnak"                | " -8.7584" | "0.00142655" |
| 1390103_at   | "Phf2_predicted"       | " -8.7573" | "0.00142918" |
| 1388448_at   | "LOC691031"            | " -8.7520" | "0.00144264" |
| 1367854_at   | "Acly"                 | " -8.7512" | "0.00144457" |
| 1373515_at   | "RGD1307414_predicted" | " -8.7510" | "0.00144509" |
| 1377263_at   | "Havcr2"               | " -8.7495" | "0.00144882" |
| 1371692_at   | "MlIt11"               | " -8.7383" | "0.00147744" |
| 1378921_at   | NA                     | " 8.7304"  | "0.00149800" |
| 1374447_at   | "Usp9x_predicted"      | " 8.7291"  | "0.00150148" |
| 1389123_at   | "Ccl6"                 | " -8.7284" | "0.00150327" |
| 1390531_at   | "RGD1306056_predicted" | " -8.7272" | "0.00150658" |
| 1398563_at   | NA                     | " 8.7241"  | "0.00151465" |
| 1369160_a_at | "Slc4a7"               | " -8.7239" | "0.00151528" |
| 1372459_at   | "Vasp_predicted"       | " -8.7215" | "0.00152167" |
| 1387135_at   | "Adam15"               | " -8.7183" | "0.00153001" |
| 1373829_at   | "Fgfr2"                | " 8.7163"  | "0.00153541" |
| 1379497_at   | NA                     | " 8.7139"  | "0.00154203" |
| 1382953_at   | NA                     | " 8.7135"  | "0.00154302" |
| 1368437_at   | "Ca4"                  | " 8.7128"  | "0.00154484" |
| 1389782_at   | "RGD1305587_predicted" | " 8.7071"  | "0.00156036" |
| 1384124_at   | NA                     | " -8.7063" | "0.00156247" |
| 1388953_at   | "Gnl3"                 | " -8.7038" | "0.00156941" |
| 1367624_at   | "Atf4"                 | " -8.7008" | "0.00157780" |
| 1390867_at   | NA                     | " -8.7007" | "0.00157797" |
| 1390326_at   | "Ang1"                 | " -8.6978" | "0.00158617" |
| 1376084_a_at | "Esp1_predicted"       | " 8.6969"  | "0.00158844" |
| 1398753_at   | "Akr1a1"               | " -8.6962" | "0.00159050" |
| 1370319_at   | "Ppil"                 | " -8.6941" | "0.00159636" |

|              |                      |         |            |
|--------------|----------------------|---------|------------|
| 1369543_s_at | Gs3                  | -7.9457 | 0.00000774 |
| 1374886_at   | Bcs11                | -7.9439 | 0.00000775 |
| 1389428_at   | F10                  | -7.9441 | 0.00000775 |
| 1392906_at   | Ubl4a_predicted      | -7.9437 | 0.00000775 |
| 1371483_at   | Nnt                  | 7.9362  | 0.00000785 |
| 1371403_at   | Cct3                 | -7.9343 | 0.00000786 |
| 1389968_at   | Eif3s10              | -7.9344 | 0.00000786 |
| 1371792_at   | NA                   | 7.9319  | 0.00000789 |
| 1395998_at   | Nol5a                | -7.9283 | 0.00000793 |
| 1387506_at   | Foxa3                | -7.9257 | 0.00000796 |
| 1374842_at   | Cebpz_predicted      | -7.9203 | 0.00000802 |
| 1393356_at   | NA                   | 7.9207  | 0.00000802 |
| 1372358_at   | LOC686590            | 7.9153  | 0.00000809 |
| 1383005_at   | NA                   | -7.9141 | 0.00000811 |
| 1388920_at   | Bmp6                 | 7.9115  | 0.00000812 |
| 1380168_at   | Etv4_predicted       | -7.9114 | 0.00000812 |
| 1395274_at   | Dst_predicted        | 7.9051  | 0.00000821 |
| 1383332_at   | NA                   | 7.9031  | 0.00000823 |
| 1367837_at   | Psma4                | -7.9019 | 0.00000823 |
| 1376340_a_at | Tssc4                | -7.9018 | 0.00000823 |
| 1398375_at   | Mta3_predicted       | 7.9009  | 0.00000824 |
| 1371372_at   | LOC367808            | -7.8995 | 0.00000825 |
| 1367496_at   | Tm9sf2               | 7.8961  | 0.00000831 |
| 1383512_at   | MlIt10               | 7.895   | 0.00000831 |
| 1390951_at   | NA                   | 7.8908  | 0.00000835 |
| 1374332_at   | Pdcc11_predicted     | -7.8915 | 0.00000835 |
| 1393625_at   | LOC313934            | 7.8862  | 0.00000842 |
| 1374956_at   | Pcm1                 | 7.8848  | 0.00000843 |
| 1387367_at   | Glg1                 | 7.8818  | 0.00000847 |
| 1394778_at   | Nfib                 | 7.879   | 0.00000849 |
| 1374738_at   | Sdccag10             | 7.8801  | 0.00000849 |
| 1384210_at   | RSB-11-77            | 7.8776  | 0.00000851 |
| 1389464_at   | Lnx1_predicted       | 7.8755  | 0.00000853 |
| 1398758_at   | Arf4                 | -7.874  | 0.00000854 |
| 1378134_at   | Atp8b1_predicted     | 7.874   | 0.00000854 |
| 1371115_at   | Ptpre                | 7.8728  | 0.00000855 |
| 1389031_at   | Mest                 | 7.8709  | 0.00000857 |
| 1388965_at   | Ppp2r5e_predicted    | 7.8707  | 0.00000857 |
| 1368967_at   | Eif2b3               | -7.8693 | 0.00000858 |
| 1375672_at   | RGD1308513           | -7.8692 | 0.00000858 |
| 1398981_at   | LOC691278            | -7.8676 | 0.00000859 |
| 1372348_at   | RGD1563580_predicted | 7.8679  | 0.00000859 |
| 1381010_at   | Kcnd2                | 7.8668  | 0.0000086  |
| 1384478_at   | MlIt3                | 7.8658  | 0.0000086  |
| 1372185_at   | RGD1306582           | -7.866  | 0.0000086  |
| 1377838_at   | RGD1562218           | -7.8634 | 0.00000863 |
| 1373376_at   | NA                   | 7.8621  | 0.00000864 |
| 1370252_at   | Avpi1                | -7.8584 | 0.00000869 |
| 1371999_at   | NA                   | -7.8556 | 0.00000872 |
| 1383437_at   | RGD1562478_predicted | 7.8555  | 0.00000872 |



|              |                        |            |              |
|--------------|------------------------|------------|--------------|
| 1375559_at   | "LOC686323"            | " 8.6845"  | "0.00162348" |
| 1392991_at   | "LOC682902"            | " -8.6843" | "0.00162404" |
| 1389291_at   | "Chchd3_predicted"     | " 8.6841"  | "0.00162477" |
| 1371216_s_at | "Fut2"                 | " -8.6810" | "0.00163345" |
| 1382848_at   | "Foxa1"                | " -8.6797" | "0.00163720" |
| 1382230_at   | "Klhdc8a"              | " 8.6786"  | "0.00164029" |
| 1374472_at   | "MGC116266"            | " -8.6737" | "0.00165453" |
| 1377254_a_at | "Cohh1_predicted"      | " 8.6701"  | "0.00166504" |
| 1381003_at   | "Zfpn1a2_predicted"    | " -8.6644" | "0.00168177" |
| 1383702_at   | NA                     | " -8.6616" | "0.00169005" |
| 1376793_at   | "RGD1308377_predicted" | " 8.6593"  | "0.00169713" |
| 1378587_at   | "LOC690586"            | " 8.6577"  | "0.00170179" |
| 1374279_at   | "Scye1"                | " -8.6561" | "0.00170657" |
| 1391849_at   | "Mizf_predicted"       | " -8.6477" | "0.00173196" |
| 1380766_a_at | "RGD1563510_predicted" | " 8.6433"  | "0.00174537" |
| 1390379_at   | "Lmo4"                 | " -8.6432" | "0.00174579" |
| 1383582_at   | "Tmem54"               | " 8.6411"  | "0.00175216" |
| 1373822_at   | "RGD1306356"           | " -8.6385" | "0.00176024" |
| 1386930_at   | "Psm4"                 | " -8.6369" | "0.00176525" |
| 1368668_at   | "Plaa"                 | " -8.6188" | "0.00182250" |
| 1370243_a_at | "Ptma"                 | " -8.6177" | "0.00182595" |
| 1393361_at   | "RGD1310922_predicted" | " -8.6091" | "0.00185392" |
| 1376328_at   | "RGD1310819_predicted" | " -8.6058" | "0.00186468" |
| 1369984_at   | "Cox17"                | " 8.6026"  | "0.00187521" |
| 1371838_at   | "Sfrs2"                | " -8.5990" | "0.00188726" |
| 1398591_at   | "Ccr12_predicted"      | " 8.5988"  | "0.00188784" |
| 1368395_at   | "Gpc3"                 | " 8.5988"  | "0.00188804" |
| 1367736_at   | "Rraga"                | " -8.5969" | "0.00189414" |
| 1373626_at   | NA                     | " 8.5942"  | "0.00190339" |
| 1390271_at   | "Plekha6_predicted"    | " 8.5883"  | "0.00192324" |
| 1388201_at   | "Bmp6"                 | " -8.5857" | "0.00193210" |
| 1371659_at   | "Rhoc_predicted"       | " -8.5852" | "0.00193378" |
| 1367869_at   | "Oxr1"                 | " -8.5836" | "0.00193926" |
| 1391889_at   | "Ddx52"                | " -8.5829" | "0.00194166" |
| 1383855_at   | "Degs2"                | " 8.5821"  | "0.00194447" |
| 1383097_at   | "RGD1311783_predicted" | " -8.5762" | "0.00196493" |
| 1380582_at   | "Csf1"                 | " 8.5757"  | "0.00196663" |
| 1383813_at   | "Arl2bp"               | " -8.5751" | "0.00196870" |
| 1388107_at   | "Ppp2r2d"              | " -8.5745" | "0.00197081" |
| 1374357_at   | "Cdc91l1"              | " 8.5736"  | "0.00197378" |
| 1377121_at   | "Dlg5_predicted"       | " 8.5720"  | "0.00197943" |
| 1388556_at   | "Stx6"                 | " -8.5664" | "0.00199909" |
| 1383886_at   | NA                     | " 8.5647"  | "0.00200509" |
| 1391608_at   | "RGD1565449_predicted" | " 8.5576"  | "0.00203059" |
| 1382873_at   | "Cttnbp2nl_predicted"  | " -8.5531" | "0.00204698" |
| 1383327_at   | "RGD1563912_predicted" | " -8.5515" | "0.00205265" |
| 1383094_at   | NA                     | " 8.5482"  | "0.00206454" |
| 1389531_at   | "Zfp330_predicted"     | " -8.5478" | "0.00206630" |
| 1398847_at   | "Nudt4"                | " 8.5431"  | "0.00208325" |
| 1398930_at   | "Atp6v0b_predicted"    | " -8.5394" | "0.00209711" |

|              |                      |         |            |
|--------------|----------------------|---------|------------|
| 1373272_at   | Plekha5              | 7.853   | 0.00000875 |
| 1389683_at   | NA                   | -7.8514 | 0.00000876 |
| 1389021_at   | RGD1306332_predicted | -7.8514 | 0.00000876 |
| 1373209_at   | RGD1305572           | -7.8496 | 0.00000878 |
| 1382269_at   | Cnnm2                | 7.846   | 0.00000882 |
| 1383188_at   | NA                   | 7.8465  | 0.00000882 |
| 1381058_at   | NA                   | 7.8391  | 0.00000892 |
| 1373664_at   | Pigc                 | -7.8397 | 0.00000892 |
| 1369635_at   | Sord                 | 7.8386  | 0.00000892 |
| 1375565_at   | Timm22               | -7.8364 | 0.00000895 |
| 1377802_at   | RGD1566399_predicted | 7.8353  | 0.00000896 |
| 1372593_at   | Zfp110               | -7.8335 | 0.00000898 |
| 1388802_at   | Bex1                 | -7.8312 | 0.000009   |
| 1373989_at   | Rassf1               | -7.832  | 0.000009   |
| 1373241_at   | Mrpl49               | -7.8285 | 0.00000904 |
| 1398877_at   | Stip1                | -7.828  | 0.00000904 |
| 1388616_at   | MGC72955             | -7.8254 | 0.00000907 |
| 1384032_at   | NA                   | -7.8252 | 0.00000907 |
| 1376101_at   | Lrp6_predicted       | 7.8236  | 0.00000909 |
| 1372837_at   | NA                   | 7.8221  | 0.0000091  |
| 1367898_at   | Bnip3l               | 7.8208  | 0.00000911 |
| 1388321_at   | Imp3_predicted       | -7.8205 | 0.00000911 |
| 1368508_at   | Psm3l                | -7.8192 | 0.00000912 |
| 1372028_at   | RGD1305727_predicted | -7.8198 | 0.00000912 |
| 1372643_at   | RGD1563977_predicted | 7.8171  | 0.00000915 |
| 1392209_at   | Gcnt3                | -7.8135 | 0.0000092  |
| 1397634_at   | RGD1306359_predicted | 7.8108  | 0.00000924 |
| 1382183_at   | NA                   | 7.8091  | 0.00000925 |
| 1389601_at   | Nfib                 | 7.809   | 0.00000925 |
| 1398783_at   | Gps1                 | -7.8065 | 0.00000928 |
| 1373155_at   | Mrpl46               | -7.8064 | 0.00000928 |
| 1388554_at   | Bzw1                 | -7.8039 | 0.00000931 |
| 1370614_s_at | Stk39                | 7.8007  | 0.00000936 |
| 1374444_at   | Plxnb1_predicted     | -7.798  | 0.0000094  |
| 1381555_at   | Bclaf1               | -7.7943 | 0.00000945 |
| 1375337_at   | Adam9_predicted      | 7.7928  | 0.00000947 |
| 1389159_at   | NA                   | 7.7924  | 0.00000947 |
| 1397719_at   | NA                   | -7.7903 | 0.0000095  |
| 1375029_at   | NA                   | -7.7886 | 0.0000095  |
| 1389686_at   | Prkx                 | -7.7892 | 0.0000095  |
| 1373846_at   | RGD1561589_predicted | -7.7898 | 0.0000095  |
| 1382993_at   | Bbc3                 | -7.7877 | 0.00000951 |
| 1395362_at   | NA                   | 7.7864  | 0.00000952 |
| 1389522_at   | Plekha6_predicted    | 7.7868  | 0.00000952 |
| 1393228_at   | Glox1                | -7.784  | 0.00000954 |
| 1393096_at   | Stxbp5               | 7.7846  | 0.00000954 |
| 1388679_at   | Tbc1d14              | 7.782   | 0.00000957 |
| 1376407_a_at | Lsm7_predicted       | -7.7782 | 0.00000963 |
| 1399002_at   | Mrps17_predicted     | -7.7731 | 0.00000971 |
| 1376690_at   | Surb7_predicted      | -7.7727 | 0.00000971 |

|              |                        |            |              |
|--------------|------------------------|------------|--------------|
| 1374522_at   | "LOC683007"            | " 8.5374"  | "0.00210468" |
| 1382219_at   | "RGD1307509"           | " -8.5367" | "0.00210716" |
| 1386754_at   | NA                     | " 8.5365"  | "0.00210796" |
| 1367578_at   | "Prdx2"                | " -8.5331" | "0.00212084" |
| 1368661_at   | "Slc13a2"              | " 8.5289"  | "0.00213644" |
| 1384907_at   | "LOC306096"            | " 8.5287"  | "0.00213736" |
| 1370223_at   | "Arfrp1"               | " -8.5281" | "0.00213971" |
| 1398317_at   | "Bpnt1"                | " 8.5235"  | "0.00215702" |
| 1367827_at   | "Ppp2cb"               | " -8.5227" | "0.00216027" |
| 1390566_a_at | "Ckmt1"                | " -8.5223" | "0.00216175" |
| 1367811_at   | "Phgdh"                | " -8.5194" | "0.00217303" |
| 1375950_a_at | NA                     | " -8.5177" | "0.00217955" |
| 1377644_at   | "RGD1308706_predicted" | " 8.5162"  | "0.00218545" |
| 1370286_at   | "Slc38a2"              | " 8.5148"  | "0.00219062" |
| 1383457_at   | "RGD1566090_predicted" | " -8.5120" | "0.00220183" |
| 1389576_at   | "Snrbp2_predicted"     | " -8.5044" | "0.00223157" |
| 1372506_at   | "Psmc3"                | " -8.5028" | "0.00223780" |
| 1378543_at   | "Hnrpa2b1_predicted"   | " -8.5010" | "0.00224512" |
| 1384017_at   | "Lrrk1_predicted"      | " 8.4972"  | "0.00226058" |
| 1374432_at   | "Alcam"                | " 8.4965"  | "0.00226306" |
| 1387726_at   | "Cdx2"                 | " 8.4954"  | "0.00226765" |
| 1382411_at   | NA                     | " -8.4935" | "0.00227513" |
| 1374648_at   | NA                     | " -8.4930" | "0.00227735" |
| 1378027_at   | "Pvrl3_predicted"      | " 8.4876"  | "0.00229952" |
| 1374949_at   | "LOC499871"            | " -8.4869" | "0.00230205" |
| 1389032_at   | "Mcoln1_predicted"     | " 8.4826"  | "0.00231995" |
| 1389161_at   | NA                     | " 8.4758"  | "0.00234821" |
| 1388960_at   | "Pyp"                  | " -8.4738" | "0.00235668" |
| 1388051_at   | "Slc26a3"              | " 8.4704"  | "0.00237103" |
| 1379665_at   | "Ppwd1_predicted"      | " -8.4622" | "0.00240583" |
| 1388444_at   | "Ubx2"                 | " -8.4590" | "0.00241940" |
| 1398308_at   | "Rpa3_predicted"       | " 8.4588"  | "0.00242026" |
| 1375845_at   | "RGD1562920_predicted" | " 8.4554"  | "0.00243511" |
| 1373405_at   | NA                     | " -8.4514" | "0.00245269" |
| 1370050_at   | "Atp2b1"               | " 8.4508"  | "0.00245507" |
| 1386671_at   | "Ift74"                | " 8.4499"  | "0.00245931" |
| 1367833_at   | "Psmc5"                | " -8.4497" | "0.00245987" |
| 1399117_at   | "RGD1311745"           | " -8.4443" | "0.00248370" |
| 1374580_at   | "Senp6_predicted"      | " -8.4431" | "0.00248937" |
| 1370070_at   | "Synj1"                | " 8.4404"  | "0.00250140" |
| 1383153_at   | NA                     | " 8.4393"  | "0.00250608" |
| 1389649_at   | NA                     | " 8.4385"  | "0.00250959" |
| 1385529_at   | "RGD1311662_predicted" | " 8.4382"  | "0.00251094" |
| 1397917_at   | NA                     | " 8.4334"  | "0.00253254" |
| 1395694_at   | "Fbxo9"                | " -8.4323" | "0.00253782" |
| 1370062_at   | "Hig1"                 | " 8.4313"  | "0.00254232" |
| 1373393_at   | "LOC299907"            | " 8.4312"  | "0.00254276" |
| 1394169_at   | NA                     | " -8.4283" | "0.00255568" |
| 1372083_at   | "Polr2b_predicted"     | " -8.4258" | "0.00256716" |
| 1376868_at   | "Cobll1_predicted"     | " 8.4206"  | "0.00259145" |

|              |                      |         |            |
|--------------|----------------------|---------|------------|
| 1371597_at   | Rnf187_predicted     | -7.7715 | 0.00000972 |
| 1385138_at   | NA                   | 7.7687  | 0.00000975 |
| 1398430_at   | NA                   | 7.7692  | 0.00000975 |
| 1395079_at   | NA                   | -7.767  | 0.00000977 |
| 1375856_at   | NA                   | 7.7664  | 0.00000977 |
| 1367956_at   | Ncdn                 | -7.7663 | 0.00000977 |
| 1372389_at   | Ier2                 | -7.7606 | 0.00000986 |
| 1384029_at   | Xpa_predicted        | 7.7606  | 0.00000986 |
| 1389019_at   | NA                   | 7.7598  | 0.00000987 |
| 1372463_at   | Fcho2_predicted      | 7.7567  | 0.00000991 |
| 1388286_a_at | Cdc34_predicted      | -7.7527 | 0.00000998 |
| 1387864_at   | Kidins220            | 7.7501  | 0.00001    |
| 1385261_s_at | NA                   | 7.7498  | 0.00001    |
| 1374153_at   | Pdcl3                | -7.7495 | 0.00001    |
| 1383415_at   | Ppp3ca               | 7.7498  | 0.00001    |
| 1389011_at   | RGD1305156           | 7.7479  | 0.00001001 |
| 1385427_at   | RGD1560397_predicted | 7.7481  | 0.00001001 |
| 1379810_at   | Scye1                | -7.7469 | 0.00001002 |
| 1377180_at   | NA                   | 7.7446  | 0.00001006 |
| 1376761_at   | Hdac4                | 7.739   | 0.00001015 |
| 1371884_at   | Ttc3_predicted       | 7.735   | 0.00001022 |
| 1374820_at   | NA                   | -7.7337 | 0.00001023 |
| 1398895_at   | Golga7               | -7.7296 | 0.00001028 |
| 1368371_at   | Kcnq1                | 7.7308  | 0.00001028 |
| 1373589_at   | Mtmr3                | 7.7305  | 0.00001028 |
| 1387117_at   | Zfp265               | -7.7297 | 0.00001028 |
| 1399012_at   | RGD1310313_predicted | 7.7282  | 0.00001029 |
| 1374519_at   | Ggcx                 | 7.7211  | 0.00001041 |
| 1370066_at   | Keap1                | -7.7219 | 0.00001041 |
| 1373590_at   | Stom                 | -7.7205 | 0.00001042 |
| 1398908_at   | Stoml2               | -7.7159 | 0.00001049 |
| 1378253_at   | Gnpat                | -7.7126 | 0.00001052 |
| 1372869_at   | Gtpbp4               | -7.714  | 0.00001052 |
| 1371351_at   | MGC112727            | -7.7133 | 0.00001052 |
| 1382050_at   | NA                   | 7.7123  | 0.00001052 |
| 1379406_at   | RGD1308396_predicted | -7.7138 | 0.00001052 |
| 1375579_at   | LOC690871            | -7.71   | 0.00001056 |
| 1370368_at   | Cabin1               | 7.7058  | 0.00001061 |
| 1383543_at   | Golt1b_predicted     | -7.7061 | 0.00001061 |
| 1379305_at   | NA                   | 7.707   | 0.00001061 |
| 1371838_at   | Sfrs2                | -7.7022 | 0.00001067 |
| 1384940_at   | RGD1305314           | -7.6991 | 0.00001073 |
| 1385133_at   | LOC691729            | -7.6979 | 0.00001074 |
| 1377708_at   | LOC499339            | -7.6957 | 0.00001076 |
| 1389050_at   | RGD1560049_predicted | -7.6959 | 0.00001076 |
| 1372417_at   | Sertad1              | -7.6962 | 0.00001076 |
| 1393142_at   | LOC367153            | 7.694   | 0.00001078 |
| 1368268_at   | Tdg                  | -7.6937 | 0.00001078 |
| 1376786_a_at | NA                   | 7.6882  | 0.00001088 |
| 1379407_at   | Imp4                 | -7.6856 | 0.00001091 |

|              |                        |            |              |
|--------------|------------------------|------------|--------------|
| 1383085_at   | "Sh3bgrl_predicted"    | " 8.4160"  | "0.00261270" |
| 1370583_s_at | "Abcb1b"               | " 8.4142"  | "0.00262112" |
| 1390119_at   | "Sfrp2"                | " -8.4142" | "0.00262121" |
| 1379488_at   | "Trp53rk_predicted"    | " -8.4069" | "0.00265550" |
| 1369224_at   | "Cdh17"                | " 8.4053"  | "0.00266326" |
| 1379136_at   | NA                     | " 8.4043"  | "0.00266828" |
| 1382143_at   | "Farp1_predicted"      | " 8.4022"  | "0.00267816" |
| 1377112_at   | "Cda_predicted"        | " 8.4014"  | "0.00268175" |
| 1377096_at   | "Mtfmt"                | " 8.4000"  | "0.00268866" |
| 1391153_at   | NA                     | " -8.3989" | "0.00269382" |
| 1389013_at   | "RGD1308469_predicted" | " -8.3969" | "0.00270359" |
| 1393317_at   | "RGD1560852_predicted" | " 8.3947"  | "0.00271445" |
| 1398952_at   | "RGD1564093_predicted" | " -8.3933" | "0.00272104" |
| 1370009_at   | "Apoc3"                | " 8.3928"  | "0.00272352" |
| 1382341_at   | "RGD1561878_predicted" | " 8.3915"  | "0.00273006" |
| 1389072_at   | "Mtmr4_predicted"      | " 8.3897"  | "0.00273862" |
| 1373732_at   | "Acp6"                 | " 8.3896"  | "0.00273907" |
| 1389102_at   | "RGD1566072_predicted" | " 8.3874"  | "0.00275028" |
| 1374521_at   | NA                     | " -8.3843" | "0.00276542" |
| 1377842_at   | "Twistnb_predicted"    | " -8.3810" | "0.00278165" |
| 1388321_at   | "Imp3_predicted"       | " -8.3807" | "0.00278330" |
| 1377656_at   | "Rbm13"                | " -8.3798" | "0.00278787" |
| 1373105_at   | "Tmed1"                | " -8.3793" | "0.00279008" |
| 1374976_a_at | "Soat1"                | " 8.3783"  | "0.00279548" |
| 1370043_at   | "Alcam"                | " 8.3776"  | "0.00279864" |
| 1389204_at   | "RGD1564456_predicted" | " -8.3709" | "0.00283247" |
| 1376287_at   | "Capn13"               | " -8.3697" | "0.00283873" |
| 1372092_at   | "Trak2"                | " 8.3692"  | "0.00284145" |
| 1374987_at   | NA                     | " 8.3612"  | "0.00288237" |
| 1369336_at   | "Hr"                   | " -8.3603" | "0.00288734" |
| 1372337_at   | "Keap1"                | " -8.3593" | "0.00289241" |
| 1390410_at   | NA                     | " -8.3583" | "0.00289769" |
| 1388825_at   | NA                     | " 8.3573"  | "0.00290257" |
| 1398898_at   | "Ensa"                 | " -8.3531" | "0.00292479" |
| 1399090_at   | "Dync1li1"             | " -8.3526" | "0.00292729" |
| 1378568_a_at | "RGD1306228_predicted" | " -8.3524" | "0.00292849" |
| 1390699_at   | "RGD1311595"           | " 8.3501"  | "0.00294029" |
| 1379255_at   | "Atp6ap2"              | " -8.3484" | "0.00294974" |
| 1387790_at   | "Paics"                | " -8.3420" | "0.00298370" |
| 1388887_at   | NA                     | " 8.3416"  | "0.00298600" |
| 1375362_at   | "RGD1563001_predicted" | " 8.3397"  | "0.00299619" |
| 1376620_at   | NA                     | " 8.3394"  | "0.00299742" |
| 1387264_at   | "Kcnk6"                | " -8.3390" | "0.00299995" |
| 1375423_at   | "LOC689959"            | " -8.3371" | "0.00301029" |
| 1395063_at   | "Mrpl14_predicted"     | " -8.3312" | "0.00304202" |
| 1388875_at   | "Cxxc1"                | " -8.3301" | "0.00304840" |
| 1389507_at   | "Nedd4l"               | " 8.3270"  | "0.00306545" |
| 1368106_at   | "Plk2"                 | " -8.3212" | "0.00309747" |
| 1367636_at   | "Igf2r"                | " 8.3174"  | "0.00311882" |
| 1388554_at   | "Bzw1"                 | " -8.3170" | "0.00312084" |

|              |                        |         |            |
|--------------|------------------------|---------|------------|
| 1373369_at   | NA                     | 7.6859  | 0.00001091 |
| 1380102_at   | "RGD1560964_predicted" | -7.6849 | 0.00001092 |
| 1392947_at   | NA                     | 7.6827  | 0.00001095 |
| 1375418_at   | "Trrap_predicted"      | 7.6819  | 0.00001096 |
| 1383159_at   | NA                     | 7.6806  | 0.00001098 |
| 1388546_at   | "Ablim1_predicted"     | 7.6791  | 0.000011   |
| 1384340_a_at | "Ard1_predicted"       | -7.6777 | 0.00001102 |
| 1377156_at   | "LOC679869"            | 7.6768  | 0.00001102 |
| 1377959_at   | "RGD1561287_predicted" | -7.6772 | 0.00001102 |
| 1373813_at   | "Dnajc10"              | -7.6731 | 0.00001108 |
| 1392454_at   | "RGD1308723_predicted" | -7.6731 | 0.00001108 |
| 1383127_at   | "Adam10"               | 7.6678  | 0.00001118 |
| 1370144_at   | "Gtpbp4"               | -7.6661 | 0.0000112  |
| 1372772_at   | NA                     | 7.6632  | 0.00001125 |
| 1379526_at   | "Mbp"                  | 7.6595  | 0.00001132 |
| 1372589_at   | "LOC683512"            | 7.6581  | 0.00001134 |
| 1373384_at   | "LOC691318"            | 7.6563  | 0.00001137 |
| 1389193_at   | "Sorcs2_predicted"     | 7.654   | 0.00001141 |
| 1393177_at   | "LOC502020"            | 7.6529  | 0.00001142 |
| 1378098_at   | "RGD1309748_predicted" | -7.6521 | 0.00001143 |
| 1371936_at   | "Eif4a1"               | -7.646  | 0.00001155 |
| 1370295_at   | "Nme1"                 | -7.6443 | 0.00001157 |
| 1397512_at   | "RGD1560511_predicted" | 7.6429  | 0.0000116  |
| 1371988_at   | "Man1a_predicted"      | 7.6396  | 0.00001166 |
| 1393119_at   | NA                     | -7.6348 | 0.00001175 |
| 1375904_at   | "Tmed5"                | -7.6329 | 0.00001178 |
| 1392989_at   | "Mib1_predicted"       | 7.6311  | 0.00001181 |
| 1389556_at   | "Kifap3_predicted"     | 7.6266  | 0.00001189 |
| 1384185_at   | "RGD1307704_predicted" | -7.6265 | 0.00001189 |
| 1373986_at   | NA                     | 7.6254  | 0.00001191 |
| 1374729_at   | "LOC308846"            | 7.6241  | 0.00001192 |
| 1387801_at   | "Ppp6c"                | -7.6241 | 0.00001192 |
| 1376753_at   | "Fpgt"                 | -7.6196 | 0.00001199 |
| 1393363_at   | "LOC305913"            | 7.6201  | 0.00001199 |
| 1374721_at   | NA                     | -7.619  | 0.00001199 |
| 1389664_at   | "Rbm15b_predicted"     | -7.6205 | 0.00001199 |
| 1383044_at   | NA                     | 7.6157  | 0.00001205 |
| 1391320_at   | "Hspbp1"               | -7.6147 | 0.00001207 |
| 1376489_at   | "Acp1"                 | 7.6121  | 0.00001211 |
| 1378048_at   | "LOC679869"            | 7.612   | 0.00001211 |
| 1367671_at   | "Pcna"                 | -7.6099 | 0.00001215 |
| 1382313_at   | NA                     | 7.6089  | 0.00001216 |
| 1392918_at   | "Cct8_predicted"       | -7.608  | 0.00001217 |
| 1389106_at   | "Fbxw9"                | -7.6042 | 0.00001225 |
| 1372728_at   | "Sort1"                | 7.602   | 0.00001229 |
| 1379282_at   | "Lrrfp2"               | 7.6012  | 0.0000123  |
| 1374288_at   | "Ftsj3"                | -7.5988 | 0.00001231 |
| 1376812_at   | "Ing5_predicted"       | -7.5996 | 0.00001231 |
| 1384002_at   | "LOC361929"            | 7.5999  | 0.00001231 |
| 1373632_at   | "Taf9"                 | -7.5988 | 0.00001231 |

|              |                        |           |              |
|--------------|------------------------|-----------|--------------|
| 1388330_at   | "Vkorc1"               | "-8.3165" | "0.00312409" |
| 1371985_a_at | "Bat5"                 | "8.3126"  | "0.00314573" |
| 1368806_at   | "RGD1561503_predicted" | "8.3106"  | "0.00315702" |
| 1393972_at   | "Mtf2"                 | "-8.3074" | "0.00317573" |
| 1389371_at   | NA                     | "8.2986"  | "0.00322612" |
| 1395136_at   | NA                     | "8.2984"  | "0.00322748" |
| 1371390_at   | "Tubb2c"               | "-8.2928" | "0.00326053" |
| 1382521_at   | "Gls"                  | "8.2887"  | "0.00328440" |
| 1384097_at   | "RGD1311662_predicted" | "8.2826"  | "0.00332071" |
| 1372941_at   | "Pdrgr1"               | "-8.2826" | "0.00332076" |
| 1372593_at   | "Zfp110"               | "-8.2806" | "0.00333271" |
| 1390388_at   | "Fech_predicted"       | "-8.2791" | "0.00334167" |
| 1390615_at   | "Kpna1"                | "-8.2758" | "0.00336218" |
| 1376569_at   | "Klf2_predicted"       | "-8.2744" | "0.00337023" |
| 1371448_at   | NA                     | "8.2723"  | "0.00338341" |
| 1378575_at   | "Asl"                  | "8.2679"  | "0.00341026" |
| 1372676_at   | "Fahd1"                | "8.2670"  | "0.00341598" |
| 1383625_a_at | "RGD1562173_predicted" | "-8.2646" | "0.00343099" |
| 1378161_at   | NA                     | "8.2630"  | "0.00344043" |
| 1368921_a_at | "Cd44"                 | "8.2619"  | "0.00344779" |
| 1367589_at   | "Aco2"                 | "8.2580"  | "0.00347203" |
| 1390931_at   | NA                     | "-8.2574" | "0.00347578" |
| 1389323_at   | "Wdr61"                | "-8.2562" | "0.00348306" |
| 1380389_at   | "Ptger3"               | "-8.2558" | "0.00348575" |
| 1374291_at   | "Dnajc17_predicted"    | "-8.2550" | "0.00349105" |
| 1372185_at   | "RGD1306582"           | "-8.2533" | "0.00350155" |
| 1384027_a_at | NA                     | "8.2508"  | "0.00351747" |
| 1394767_at   | "LOC684205"            | "8.2474"  | "0.00353900" |
| 1389319_at   | "LOC287177"            | "8.2462"  | "0.00354698" |
| 1373293_at   | "Lsg1"                 | "-8.2446" | "0.00355738" |
| 1375989_a_at | "Nfkb2"                | "-8.2438" | "0.00356244" |
| 1380255_at   | NA                     | "-8.2435" | "0.00356416" |
| 1373619_at   | "Ankrd10"              | "-8.2420" | "0.00357383" |
| 1395560_at   | NA                     | "-8.2402" | "0.00358561" |
| 1372634_at   | "Adprhl2_predicted"    | "-8.2378" | "0.00360107" |
| 1371640_at   | "LOC500855"            | "-8.2357" | "0.00361491" |
| 1367972_at   | "Cand1"                | "-8.2356" | "0.00361581" |
| 1371454_at   | "Tmem93_predicted"     | "-8.2315" | "0.00364262" |
| 1388777_at   | "Ssr3"                 | "-8.2263" | "0.00367699" |
| 1372252_at   | "Trappc1"              | "8.2261"  | "0.00367869" |
| 1383055_at   | "Gnaq"                 | "8.2233"  | "0.00369738" |
| 1387028_a_at | "Id1"                  | "-8.2212" | "0.00371108" |
| 1372366_at   | "Htatip"               | "-8.2206" | "0.00371512" |
| 1375267_at   | "Ppic"                 | "8.2202"  | "0.00371781" |
| 1393062_at   | NA                     | "-8.2181" | "0.00373224" |
| 1388603_a_at | "Hbld2"                | "-8.2176" | "0.00373557" |
| 1368883_at   | "Nov"                  | "-8.2109" | "0.00378164" |
| 1388413_at   | "Rrbp1_predicted"      | "8.2065"  | "0.00381202" |
| 1393088_at   | "Rg9mtd1"              | "-8.2046" | "0.00382466" |
| 1377637_at   | NA                     | "-8.2046" | "0.00382475" |

|              |                      |         |            |
|--------------|----------------------|---------|------------|
| 1379074_at   | NA                   | -7.5956 | 0.00001237 |
| 1397620_at   | Sh3md2               | -7.5953 | 0.00001237 |
| 1385767_at   | LOC304000            | 7.5902  | 0.00001248 |
| 1368817_at   | Psme4                | 7.5889  | 0.0000125  |
| 1373743_at   | RGD1305062           | -7.5884 | 0.0000125  |
| 1382223_at   | Zmym4_predicted      | 7.584   | 0.00001259 |
| 1389442_at   | NA                   | 7.5821  | 0.00001263 |
| 1382811_at   | NA                   | -7.5804 | 0.00001266 |
| 1379652_at   | LOC682398            | -7.5773 | 0.00001272 |
| 1373160_at   | LOC680466            | -7.5747 | 0.00001277 |
| 1392043_at   | Insr                 | 7.5733  | 0.00001278 |
| 1384439_at   | NA                   | -7.5741 | 0.00001278 |
| 1374252_at   | RGD1563798_predicted | 7.5703  | 0.00001283 |
| 1377458_at   | Sorl1_predicted      | 7.5707  | 0.00001283 |
| 1373652_at   | RGD1564833_predicted | 7.5691  | 0.00001285 |
| 1376113_at   | Zswim1_predicted     | -7.5627 | 0.000013   |
| 1389287_at   | NA                   | 7.5611  | 0.00001302 |
| 1373791_at   | RGD1359127           | -7.559  | 0.00001307 |
| 1391014_at   | Zmynd19              | -7.5552 | 0.00001315 |
| 1390514_at   | MGC94223             | -7.5516 | 0.00001322 |
| 1372026_at   | RGD1359310           | -7.5514 | 0.00001322 |
| 1371596_at   | Rnps1                | -7.5443 | 0.00001338 |
| 1381472_at   | Slc25a32_predicted   | -7.5426 | 0.00001341 |
| 1373671_at   | LOC688786            | -7.5389 | 0.00001348 |
| 1373556_at   | RGD1561792_predicted | -7.5393 | 0.00001348 |
| 1382536_at   | Thrap2_predicted     | 7.5366  | 0.00001353 |
| 1376664_at   | LOC246187            | -7.5357 | 0.00001354 |
| 1376994_at   | NA                   | 7.536   | 0.00001354 |
| 1382396_at   | RGD1306614           | -7.5347 | 0.00001355 |
| 1369680_at   | Slc2a13              | 7.5336  | 0.00001357 |
| 1392938_s_at | RGD1306959_predicted | -7.5322 | 0.00001359 |
| 1377825_at   | NA                   | 7.5289  | 0.00001366 |
| 1389587_at   | Umps                 | -7.5266 | 0.00001371 |
| 1377121_at   | Dlg5_predicted       | 7.5243  | 0.00001375 |
| 1374713_at   | NA                   | -7.5238 | 0.00001375 |
| 1372795_at   | Txnl4b               | -7.5247 | 0.00001375 |
| 1376351_at   | NA                   | -7.5222 | 0.00001377 |
| 1381467_at   | Neo1                 | 7.5223  | 0.00001377 |
| 1382441_at   | Arid1b               | 7.5177  | 0.00001388 |
| 1384472_at   | LOC362683            | 7.5155  | 0.00001392 |
| 1383212_at   | NA                   | 7.5143  | 0.00001394 |
| 1378860_at   | NA                   | 7.5104  | 0.00001402 |
| 1384150_at   | NA                   | 7.5109  | 0.00001402 |
| 1395010_at   | NA                   | 7.5095  | 0.00001404 |
| 1372115_at   | LOC363188            | 7.5055  | 0.00001413 |
| 1378434_at   | Setbp1_predicted     | 7.5036  | 0.00001416 |
| 1373607_at   | St3gal3              | 7.5041  | 0.00001416 |
| 1373293_at   | Lsg1                 | -7.5018 | 0.00001418 |
| 1398869_at   | Psmc4                | -7.502  | 0.00001418 |
| 1390875_a_at | RGD1359593           | 7.5011  | 0.00001418 |

|              |                        |            |              |
|--------------|------------------------|------------|--------------|
| 1379027_at   | "RGD1308329_predicted" | " 8.1977"  | "0.00387343" |
| 1371988_at   | "Man1a_predicted"      | " 8.1956"  | "0.00388813" |
| 1389786_at   | "LOC500419"            | " 8.1930"  | "0.00390645" |
| 1386002_at   | NA                     | " 8.1924"  | "0.00391039" |
| 1392875_at   | "Fbxl4_predicted"      | " 8.1917"  | "0.00391560" |
| 1387692_a_at | "Sstr1"                | " -8.1909" | "0.00392147" |
| 1368379_at   | "Scarb2"               | " 8.1903"  | "0.00392549" |
| 1393558_at   | "Itga6"                | " -8.1903" | "0.00392598" |
| 1376164_at   | "Sf4"                  | " -8.1889" | "0.00393530" |
| 1389048_at   | "Bmp1"                 | " 8.1887"  | "0.00393706" |
| 1380067_at   | "Myo5c_predicted"      | " -8.1880" | "0.00394186" |
| 1367877_at   | "Slc11a2"              | " -8.1865" | "0.00395258" |
| 1389597_at   | "Pgbd5_predicted"      | " 8.1819"  | "0.00398642" |
| 1367929_at   | "Cd59"                 | " -8.1765" | "0.00402531" |
| 1367762_at   | "Sst"                  | " 8.1715"  | "0.00406221" |
| 1382276_at   | "Coro1c_predicted"     | " -8.1701" | "0.00407274" |
| 1376071_at   | NA                     | " 8.1689"  | "0.00408128" |
| 1372774_at   | "Coq6"                 | " 8.1655"  | "0.00410704" |
| 1372837_at   | NA                     | " 8.1641"  | "0.00411722" |
| 1374011_at   | "Ercc3"                | " -8.1639" | "0.00411855" |
| 1379651_at   | "Foxp1"                | " -8.1628" | "0.00412736" |
| 1389968_at   | "Eif3s10"              | " -8.1584" | "0.00416051" |
| 1371839_at   | "Sfrs2"                | " -8.1584" | "0.00416059" |
| 1374764_at   | "RGD1305605_predicted" | " -8.1570" | "0.00417109" |
| 1378705_at   | "RGD1310433_predicted" | " 8.1567"  | "0.00417294" |
| 1372599_at   | "Mgst2_predicted"      | " 8.1566"  | "0.00417427" |
| 1388705_at   | "RGD1565037_predicted" | " 8.1557"  | "0.00418126" |
| 1389519_at   | "Psm8"                 | " -8.1544" | "0.00419096" |
| 1367632_at   | "Glul"                 | " 8.1513"  | "0.00421420" |
| 1373729_at   | NA                     | " 8.1497"  | "0.00422720" |
| 1370893_at   | "Acaca"                | " 8.1479"  | "0.00424054" |
| 1398430_at   | NA                     | " 8.1474"  | "0.00424486" |
| 1388447_at   | "LOC683626"            | " 8.1472"  | "0.00424587" |
| 1393866_at   | "LOC500592"            | " -8.1464" | "0.00425237" |
| 1382144_at   | "Mrpl47"               | " -8.1463" | "0.00425293" |
| 1381705_at   | NA                     | " 8.1457"  | "0.00425774" |
| 1388446_at   | NA                     | " -8.1455" | "0.00425964" |
| 1372221_at   | NA                     | " 8.1440"  | "0.00427091" |
| 1398908_at   | "Stoml2"               | " -8.1397" | "0.00430443" |
| 1386379_at   | NA                     | " 8.1369"  | "0.00432700" |
| 1370190_at   | "H3f3b"                | " -8.1325" | "0.00436141" |
| 1374620_at   | "Ceacam1"              | " -8.1323" | "0.00436359" |
| 1379057_at   | "LOC683460"            | " 8.1281"  | "0.00439699" |
| 1368283_at   | "Ehhadh"               | " 8.1273"  | "0.00440344" |
| 1387766_a_at | "Rbp2"                 | " 8.1260"  | "0.00441410" |
| 1368236_at   | "Mep1a"                | " 8.1259"  | "0.00441450" |
| 1382165_at   | "Smndc1"               | " -8.1226" | "0.00444115" |
| 1387916_at   | "Cyp4f6"               | " 8.1205"  | "0.00445860" |
| 1380100_at   | "RGD1561817_predicted" | " 8.1180"  | "0.00447841" |
| 1373160_at   | "LOC680466"            | " -8.1160" | "0.00449542" |

|              |                      |         |            |
|--------------|----------------------|---------|------------|
| 1390813_at   | RGD1560397_predicted | 7.5014  | 0.00001418 |
| 1373499_at   | Gas5                 | -7.4989 | 0.00001421 |
| 1388311_at   | Mrfap1               | -7.499  | 0.00001421 |
| 1390527_at   | RGD1562114_predicted | -7.4997 | 0.00001421 |
| 1369629_at   | Adk                  | 7.4983  | 0.00001422 |
| 1383224_at   | NA                   | -7.4968 | 0.00001424 |
| 1374030_at   | LOC684112            | 7.4953  | 0.00001427 |
| 1373319_at   | Ddx1                 | -7.494  | 0.00001429 |
| 1375441_at   | Sars1                | -7.4941 | 0.00001429 |
| 1374063_at   | Sfrs3_predicted      | -7.4879 | 0.00001444 |
| 1392888_at   | Gpc4                 | 7.486   | 0.00001447 |
| 1383970_at   | NA                   | 7.4859  | 0.00001447 |
| 1372460_at   | Pkn3                 | -7.4817 | 0.00001457 |
| 1389559_at   | NA                   | 7.4781  | 0.00001466 |
| 1388555_at   | Txn15_predicted      | -7.4761 | 0.0000147  |
| 1383685_at   | Heatr1_predicted     | -7.4755 | 0.00001471 |
| 1371957_at   | Imp4                 | -7.475  | 0.00001471 |
| 1372078_at   | Strap                | -7.4722 | 0.00001478 |
| 1371907_at   | Arl6ip4              | -7.465  | 0.00001495 |
| 1368971_a_at | Synj2                | 7.4655  | 0.00001495 |
| 1383602_at   | Pum1_predicted       | 7.4628  | 0.00001499 |
| 1373821_at   | Slc30a5_predicted    | -7.4632 | 0.00001499 |
| 1382060_at   | NA                   | 7.4612  | 0.00001502 |
| 1376659_at   | Nubpl_predicted      | 7.4609  | 0.00001502 |
| 1388516_at   | LOC499235            | -7.4591 | 0.00001505 |
| 1374657_at   | LOC687561            | -7.4591 | 0.00001505 |
| 1388428_at   | Hars2_predicted      | 7.4579  | 0.00001507 |
| 1389778_a_at | Tceb3                | -7.4565 | 0.0000151  |
| 1383921_at   | NA                   | -7.455  | 0.00001513 |
| 1371971_at   | RGD1560212_predicted | -7.4518 | 0.00001521 |
| 1378921_at   | NA                   | 7.4493  | 0.00001527 |
| 1388351_at   | RGD1305831_predicted | -7.4436 | 0.00001542 |
| 1371551_at   | Traf4_predicted      | -7.4429 | 0.00001543 |
| 1373240_at   | Dhrs3                | 7.4341  | 0.00001563 |
| 1371515_at   | LOC691193            | -7.4353 | 0.00001563 |
| 1373455_at   | Paf1                 | -7.4346 | 0.00001563 |
| 1376824_at   | RGD1311815           | 7.4352  | 0.00001563 |
| 1373195_at   | RGD1566093_predicted | -7.4346 | 0.00001563 |
| 1377827_at   | Srfbp1               | -7.4303 | 0.00001573 |
| 1398792_at   | Psmc1                | -7.4261 | 0.00001584 |
| 1372062_at   | RGD1563395_predicted | -7.4237 | 0.0000159  |
| 1397892_at   | Eif1a                | -7.4227 | 0.00001592 |
| 1373602_at   | Lars2_predicted      | 7.4195  | 0.00001599 |
| 1379858_at   | Mettl2_predicted     | -7.4199 | 0.00001599 |
| 1376620_at   | NA                   | 7.4189  | 0.000016   |
| 1388416_at   | Lrp1                 | 7.4171  | 0.00001604 |
| 1392405_at   | Tcfdp2_predicted     | 7.4126  | 0.00001616 |
| 1376206_at   | NA                   | -7.4111 | 0.0000162  |
| 1381623_at   | RGD1561347_predicted | -7.4077 | 0.00001629 |
| 1369906_s_at | Mcf2                 | -7.4028 | 0.00001642 |

|              |                        |            |              |
|--------------|------------------------|------------|--------------|
| 1375997_at   | NA                     | " 8.1158"  | "0.00449690" |
| 1380895_at   | "Aplp2"                | " -8.1155" | "0.00449961" |
| 1370135_at   | "Cav2"                 | " -8.1132" | "0.00451858" |
| 1369956_at   | "Ifngr1"               | " 8.1127"  | "0.00452249" |
| 1393105_at   | "RGD1562173_predicted" | " -8.1126" | "0.00452293" |
| 1387306_a_at | "Egr2"                 | " -8.1124" | "0.00452469" |
| 1371498_at   | "MGC125271"            | " -8.1096" | "0.00454790" |
| 1371961_at   | "Pld3"                 | " -8.1044" | "0.00459119" |
| 1373379_at   | "Irak1_predicted"      | " -8.1022" | "0.00460970" |
| 1374197_at   | NA                     | " 8.1012"  | "0.00461891" |
| 1389459_at   | "RGD1306613_predicted" | " -8.0992" | "0.00463546" |
| 1374070_at   | "Gpx2"                 | " -8.0921" | "0.00469616" |
| 1380097_at   | "Laptm4a"              | " -8.0914" | "0.00470206" |
| 1376659_at   | "Nubpl_predicted"      | " 8.0889"  | "0.00472397" |
| 1371971_at   | "RGD1560212_predicted" | " -8.0865" | "0.00474489" |
| 1376692_at   | "Hipk2_predicted"      | " 8.0843"  | "0.00476400" |
| 1372454_at   | "RGD1311899"           | " -8.0820" | "0.00478408" |
| 1370979_at   | "Ddx20"                | " -8.0818" | "0.00478591" |
| 1398900_at   | "Dctn3_predicted"      | " -8.0761" | "0.00483550" |
| 1375915_at   | "Irak1bp1_predicted"   | " -8.0760" | "0.00483705" |
| 1373673_at   | NA                     | " 8.0754"  | "0.00484203" |
| 1398391_at   | "Gnl1"                 | " -8.0740" | "0.00485457" |
| 1395587_at   | "RGD1561254_predicted" | " -8.0718" | "0.00487425" |
| 1381181_at   | NA                     | " 8.0715"  | "0.00487671" |
| 1383907_at   | NA                     | " 8.0697"  | "0.00489303" |
| 1371456_at   | "Abcf3"                | " -8.0610" | "0.00497183" |
| 1384475_at   | "Plekha5"              | " 8.0581"  | "0.00499780" |
| 1368027_at   | "Tbxas1"               | " 8.0565"  | "0.00501272" |
| 1398899_at   | "Polr2c"               | " -8.0556" | "0.00502134" |
| 1384282_at   | "Zipr1"                | " -8.0526" | "0.00504910" |
| 1374177_at   | "Taf13_predicted"      | " -8.0517" | "0.00505772" |
| 1379652_at   | "Ahctf1_predicted"     | " -8.0488" | "0.00508452" |
| 1392083_at   | "LOC299907"            | " 8.0466"  | "0.00510530" |
| 1396000_at   | NA                     | " 8.0394"  | "0.00517247" |
| 1374852_at   | "RGD1559909_predicted" | " -8.0316" | "0.00524732" |
| 1395065_at   | "Wdr41_predicted"      | " -8.0316" | "0.00524756" |
| 1398876_at   | "Abcf1"                | " -8.0295" | "0.00526815" |
| 1371868_at   | "Bcas2_predicted"      | " -8.0294" | "0.00526924" |
| 1374571_at   | "Pigx"                 | " -8.0283" | "0.00527920" |
| 1376937_at   | "RGD1565927_predicted" | " 8.0262"  | "0.00529963" |
| 1390502_at   | "RGD1309104_predicted" | " -8.0241" | "0.00532043" |
| 1375181_at   | "LOC685320"            | " -8.0190" | "0.00537042" |
| 1391426_a_at | "LOC288165"            | " -8.0187" | "0.00537379" |
| 1392471_at   | NA                     | " 8.0177"  | "0.00538319" |
| 1367677_at   | "Prdx5"                | " -8.0174" | "0.00538648" |
| 1373571_at   | "Rtn3"                 | " 8.0172"  | "0.00538865" |
| 1374117_at   | "Baiap2"               | " -8.0168" | "0.00539246" |
| 1371469_at   | "Chp"                  | " 8.0132"  | "0.00542849" |
| 1369029_at   | "Plscr1"               | " 8.0130"  | "0.00543013" |
| 1374897_at   | "LOC690585"            | " -8.0122" | "0.00543856" |

|              |                      |         |            |
|--------------|----------------------|---------|------------|
| 1379704_at   | Zfp143               | -7.4021 | 0.00001643 |
| 1378462_at   | Mtap_predicted       | 7.4008  | 0.00001645 |
| 1367870_at   | Txnl2                | -7.4007 | 0.00001645 |
| 1375887_at   | NA                   | -7.3981 | 0.00001652 |
| 1390485_at   | March5_predicted     | -7.3968 | 0.00001654 |
| 1393617_at   | NA                   | 7.3969  | 0.00001654 |
| 1380120_at   | Mtap7_predicted      | 7.3933  | 0.00001663 |
| 1372808_at   | LOC680308            | -7.3915 | 0.00001668 |
| 1369533_a_at | Htr4                 | 7.3878  | 0.00001677 |
| 1386930_at   | Psm4                 | -7.388  | 0.00001677 |
| 1374304_at   | Xrcc4                | 7.3825  | 0.00001692 |
| 1375864_at   | Cc2d1b               | -7.3814 | 0.00001695 |
| 1392503_at   | Rbm22                | -7.3799 | 0.00001697 |
| 1398802_at   | Ube2d3               | -7.3801 | 0.00001697 |
| 1367876_at   | Ipo13                | -7.3788 | 0.00001699 |
| 1383307_at   | MGC114379            | -7.3755 | 0.00001708 |
| 1391333_at   | Lrrfp2               | 7.3742  | 0.00001711 |
| 1378037_at   | RGD1310738_predicted | -7.373  | 0.00001714 |
| 1383793_at   | RGD1311909_predicted | 7.372   | 0.00001716 |
| 1371490_at   | Hsbp1                | -7.3714 | 0.00001717 |
| 1388767_at   | Pdcc6_predicted      | -7.3674 | 0.00001728 |
| 1377819_at   | RGD1561065_predicted | 7.3662  | 0.00001731 |
| 1372948_at   | LOC691814            | -7.3629 | 0.00001739 |
| 1373438_at   | Ube2o_predicted      | -7.3633 | 0.00001739 |
| 1390022_at   | Arpc5                | -7.3618 | 0.0000174  |
| 1376868_at   | Cobll1_predicted     | 7.3611  | 0.0000174  |
| 1368279_at   | Mlit3                | 7.3612  | 0.0000174  |
| 1371941_at   | RGD1310230           | 7.3621  | 0.0000174  |
| 1367824_at   | Fnta                 | -7.3591 | 0.00001745 |
| 1388184_at   | Icmt                 | -7.3567 | 0.0000175  |
| 1383090_at   | Mrps14_predicted     | -7.3565 | 0.0000175  |
| 1372334_at   | NA                   | 7.3575  | 0.0000175  |
| 1370163_at   | Odc1                 | -7.3527 | 0.00001762 |
| 1372713_at   | RGD1309550           | 7.3522  | 0.00001762 |
| 1374161_at   | LOC683676            | 7.3482  | 0.00001773 |
| 1374897_at   | LOC690585            | -7.3481 | 0.00001773 |
| 1395750_at   | NA                   | -7.3455 | 0.00001779 |
| 1376250_at   | Nufip1               | -7.3455 | 0.00001779 |
| 1374441_at   | RGD1306649           | -7.3421 | 0.00001789 |
| 1373495_at   | Ube2j1_predicted     | -7.3401 | 0.00001795 |
| 1375943_at   | NA                   | -7.3338 | 0.00001815 |
| 1367991_at   | Gcs1                 | -7.3302 | 0.00001826 |
| 1374516_at   | RGD1306894_predicted | -7.3291 | 0.00001828 |
| 1389815_at   | Ppp1r14b             | -7.3285 | 0.00001829 |
| 1383625_a_at | RGD1562173_predicted | -7.3263 | 0.00001835 |
| 1380837_at   | RGD1305846_predicted | 7.3195  | 0.00001856 |
| 1371911_at   | Tnfaip1              | -7.3195 | 0.00001856 |
| 1372366_at   | Htatip               | -7.3163 | 0.00001866 |
| 1371064_at   | Pcm1                 | 7.315   | 0.00001867 |
| 1373447_at   | RGD1305117           | -7.3151 | 0.00001867 |

|              |                        |            |              |
|--------------|------------------------|------------|--------------|
| 1371963_at   | "Pcca"                 | " 8.0082"  | "0.00547851" |
| 1388715_at   | "Gars"                 | " -8.0076" | "0.00548495" |
| 1371715_at   | "MGC112883"            | " -8.0050" | "0.00551144" |
| 1369642_at   | "Pafah1b2"             | " -8.0037" | "0.00552396" |
| 1382284_at   | "Nek3_predicted"       | " 8.0035"  | "0.00552662" |
| 1387148_at   | "Gprasp1"              | " -8.0019" | "0.00554233" |
| 1372070_at   | "Ifi30"                | " -8.0011" | "0.00555115" |
| 1369130_at   | "Rasgrp1"              | " -7.9993" | "0.00556893" |
| 1391250_at   | NA                     | " -7.9961" | "0.00560258" |
| 1399057_at   | "Morf4l1"              | " -7.9943" | "0.00562123" |
| 1367605_at   | "Pfn1"                 | " -7.9939" | "0.00562537" |
| 1376146_at   | "RGD1304587"           | " -7.9922" | "0.00564271" |
| 1388394_at   | "Aars"                 | " -7.9907" | "0.00565778" |
| 1388635_at   | "RGD1309744_predicted" | " 7.9905"  | "0.00566052" |
| 1390628_at   | "Cpeb2_predicted"      | " 7.9904"  | "0.00566148" |
| 1372365_at   | "Rin2_predicted"       | " 7.9843"  | "0.00572569" |
| 1376761_at   | NA                     | " 7.9821"  | "0.00574825" |
| 1382162_at   | NA                     | " 7.9806"  | "0.00576486" |
| 1373666_at   | "Rapgef5"              | " 7.9772"  | "0.00580074" |
| 1371724_at   | "Rexo2"                | " -7.9745" | "0.00583038" |
| 1376153_at   | NA                     | " -7.9726" | "0.00584993" |
| 1384479_at   | "Galnt3"               | " 7.9701"  | "0.00587713" |
| 1373546_at   | "Ua20"                 | " 7.9693"  | "0.00588628" |
| 1379473_at   | "RGD1307509"           | " -7.9666" | "0.00591574" |
| 1387076_at   | "Hif1a"                | " 7.9662"  | "0.00592003" |
| 1370017_at   | "Emd"                  | " -7.9649" | "0.00593427" |
| 1382117_at   | "RGD1560538_predicted" | " -7.9634" | "0.00595100" |
| 1388523_at   | "Txndc12"              | " -7.9623" | "0.00596291" |
| 1372347_at   | NA                     | " -7.9617" | "0.00596963" |
| 1372007_at   | "RGD1562975_predicted" | " -7.9605" | "0.00598314" |
| 1368588_at   | "Ddx52"                | " -7.9604" | "0.00598332" |
| 1377642_at   | "Cav2"                 | " -7.9573" | "0.00601771" |
| 1369933_at   | "Vdac2"                | " 7.9564"  | "0.00602848" |
| 1383328_x_at | "RGD1563912_predicted" | " -7.9533" | "0.00606288" |
| 1379322_at   | "Psm7_predicted"       | " -7.9509" | "0.00608932" |
| 1393956_at   | "Stk17b"               | " 7.9502"  | "0.00609756" |
| 1379326_at   | "RGD1305679"           | " 7.9499"  | "0.00610075" |
| 1389388_at   | NA                     | " 7.9489"  | "0.00611230" |
| 1377032_at   | NA                     | " 7.9452"  | "0.00615405" |
| 1390514_at   | "MGC94223"             | " -7.9437" | "0.00617117" |
| 1391097_at   | NA                     | " 7.9413"  | "0.00619950" |
| 1382381_at   | NA                     | " 7.9385"  | "0.00623166" |
| 1372873_at   | "Fbxo38_predicted"     | " -7.9366" | "0.00625314" |
| 1391179_at   | "Tcf4"                 | " -7.9355" | "0.00626596" |
| 1397241_at   | "RGD1306880_predicted" | " 7.9313"  | "0.00631512" |
| 1393193_at   | "Rpusd2_predicted"     | " -7.9285" | "0.00634730" |
| 1398773_at   | "Khdrbs1"              | " -7.9238" | "0.00640272" |
| 1368233_at   | "Gtf2f2"               | " -7.9237" | "0.00640427" |
| 1368508_at   | "Psm3"                 | " -7.9232" | "0.00640986" |
| 1374118_at   | "Lars"                 | " -7.9225" | "0.00641845" |

|            |                      |         |            |
|------------|----------------------|---------|------------|
| 1372888_at | Ube4a                | 7.3158  | 0.00001867 |
| 1393431_at | LOC687575            | -7.3132 | 0.00001871 |
| 1376110_at | Rpp25                | -7.3131 | 0.00001871 |
| 1371396_at | NA                   | -7.3106 | 0.00001878 |
| 1393377_at | Galnt4               | 7.3097  | 0.0000188  |
| 1388980_at | MGC72560             | -7.3032 | 0.00001902 |
| 1376116_at | Ddx24                | -7.3007 | 0.0000191  |
| 1383327_at | Pdcd4                | 7.2985  | 0.00001916 |
| 1398579_at | NA                   | 7.2974  | 0.00001918 |
| 1377746_at | Rbm12                | -7.2971 | 0.00001918 |
| 1389627_at | RGD1306209           | -7.2959 | 0.00001921 |
| 1375480_at | RGD1566399_predicted | 7.2938  | 0.00001928 |
| 1373380_at | RGD1562140_predicted | -7.2929 | 0.0000193  |
| 1387344_at | Aldh6a1              | 7.2919  | 0.00001932 |
| 1368059_at | Crym                 | -7.2903 | 0.00001935 |
| 1378138_at | Kif16b_predicted     | 7.2908  | 0.00001935 |
| 1376828_at | Gprc5a               | -7.2884 | 0.00001941 |
| 1371951_at | Fhl2                 | -7.2855 | 0.0000195  |
| 1392901_at | LOC367113            | 7.2851  | 0.0000195  |
| 1381120_at | NA                   | -7.2847 | 0.0000195  |
| 1389009_at | Rsrc1                | 7.2829  | 0.00001956 |
| 1383594_at | LOC312863            | 7.28    | 0.00001965 |
| 1388954_at | RGD1306717_predicted | -7.2768 | 0.00001975 |
| 1393233_at | Armc6_predicted      | -7.2755 | 0.00001977 |
| 1377345_at | Bbx_predicted        | 7.2761  | 0.00001977 |
| 1386097_at | NA                   | 7.2726  | 0.00001987 |
| 1375205_at | Pcaf                 | 7.2722  | 0.00001987 |
| 1385701_at | NA                   | 7.2717  | 0.00001988 |
| 1380527_at | Pde7b                | 7.2705  | 0.00001991 |
| 1391656_at | NA                   | -7.2698 | 0.00001992 |
| 1389753_at | Brp16                | -7.2632 | 0.00002016 |
| 1379076_at | NA                   | 7.2586  | 0.00002032 |
| 1390972_at | Tprkb                | -7.2571 | 0.00002036 |
| 1388772_at | Lsm8_predicted       | -7.2558 | 0.00002038 |
| 1378531_at | NA                   | 7.2561  | 0.00002038 |
| 1381081_at | NA                   | 7.2547  | 0.00002041 |
| 1373500_at | Lrpprc               | 7.2473  | 0.00002068 |
| 1374297_at | Dync1li1             | -7.2465 | 0.0000207  |
| 1388155_at | Krt1-18              | -7.2416 | 0.00002086 |
| 1379422_at | LOC300284            | -7.2417 | 0.00002086 |
| 1372126_at | Fem1b_predicted      | -7.2411 | 0.00002087 |
| 1387113_at | Ctbp2                | 7.2403  | 0.00002089 |
| 1397558_at | NA                   | 7.2396  | 0.0000209  |
| 1377377_at | Utrn                 | 7.238   | 0.00002095 |
| 1381413_at | Arid1b               | 7.2374  | 0.00002096 |
| 1368588_at | Ddx52                | -7.2328 | 0.00002113 |
| 1373647_at | Zfp622               | -7.2309 | 0.00002119 |
| 1372130_at | Arfgef1_predicted    | 7.2295  | 0.0000212  |
| 1378536_at | NA                   | 7.2295  | 0.0000212  |
| 1391573_at | Tnfrsf21_predicted   | -7.2301 | 0.0000212  |

|              |                        |            |              |
|--------------|------------------------|------------|--------------|
| 1368426_at   | "Crot"                 | " 7.9219"  | "0.00642612" |
| 1374501_at   | "RGD1309571"           | " -7.9210" | "0.00643623" |
| 1382166_at   | "Sprb"                 | " -7.9199" | "0.00644967" |
| 1388643_at   | "Fut8"                 | " 7.9196"  | "0.00645357" |
| 1371475_at   | "Rnase4"               | " -7.9179" | "0.00647328" |
| 1373539_at   | NA                     | " -7.9178" | "0.00647535" |
| 1382366_at   | "Pik3ca"               | " -7.9145" | "0.00651502" |
| 1396264_at   | "LOC689116"            | " 7.9106"  | "0.00656180" |
| 1384920_at   | NA                     | " 7.9087"  | "0.00658520" |
| 1372620_at   | "Anp32e"               | " -7.9012" | "0.00667715" |
| 1372917_at   | "RGD1306819"           | " -7.8999" | "0.00669324" |
| 1375847_at   | "Nudt16_predicted"     | " 7.8964"  | "0.00673695" |
| 1384584_at   | NA                     | " 7.8958"  | "0.00674407" |
| 1388609_at   | "RGD1311815"           | " -7.8958" | "0.00674519" |
| 1380668_at   | "MGC72974"             | " 7.8925"  | "0.00678628" |
| 1373168_at   | "LOC288913"            | " -7.8885" | "0.00683683" |
| 1390967_a_at | "RGD1306841"           | " -7.8843" | "0.00689095" |
| 1377838_at   | "RGD1562218"           | " -7.8699" | "0.00707700" |
| 1380180_at   | NA                     | " 7.8682"  | "0.00709979" |
| 1394940_at   | "RGD1311381_predicted" | " -7.8639" | "0.00715644" |
| 1373590_at   | "Stom"                 | " -7.8587" | "0.00722712" |
| 1392807_at   | "Lig3"                 | " -7.8579" | "0.00723759" |
| 1368191_a_at | "Slc22a1"              | " 7.8571"  | "0.00724768" |
| 1371983_at   | "Josd1"                | " 7.8535"  | "0.00729631" |
| 1381555_at   | NA                     | " -7.8491" | "0.00735750" |
| 1390058_at   | "LOC361990"            | " -7.8447" | "0.00741684" |
| 1375340_at   | NA                     | " 7.8433"  | "0.00743621" |
| 1390223_at   | NA                     | " -7.8349" | "0.00755388" |
| 1376867_at   | "RGD1307414_predicted" | " -7.8348" | "0.00755565" |
| 1390273_at   | "Znf532_predicted"     | " -7.8268" | "0.00766979" |
| 1389984_at   | "LOC681740"            | " 7.8262"  | "0.00767844" |
| 1388131_at   | "Tubb2b"               | " -7.8261" | "0.00767979" |
| 1389527_at   | "LOC378467"            | " -7.8248" | "0.00769738" |
| 1390049_at   | "Fhl1"                 | " -7.8178" | "0.00779917" |
| 1379388_at   | "Snx13_predicted"      | " 7.8068"  | "0.00796109" |
| 1371506_at   | NA                     | " 7.8066"  | "0.00796483" |
| 1374483_at   | NA                     | " -7.8063" | "0.00796805" |
| 1371951_at   | "Fhl2"                 | " -7.8037" | "0.00800743" |
| 1388725_at   | "Lepr"                 | " 7.8027"  | "0.00802184" |
| 1391238_at   | "Gmds"                 | " 7.8009"  | "0.00804923" |
| 1392909_at   | NA                     | " -7.7981" | "0.00809233" |
| 1373329_at   | "Tmprss2"              | " -7.7933" | "0.00816430" |
| 1372918_at   | "RGD1305898_predicted" | " -7.7925" | "0.00817656" |
| 1378068_at   | NA                     | " -7.7866" | "0.00826706" |
| 1385458_a_at | "RGD1306959_predicted" | " -7.7844" | "0.00830192" |
| 1397892_at   | "Eif1a"                | " -7.7840" | "0.00830776" |
| 1369626_at   | "Ide"                  | " 7.7827"  | "0.00832750" |
| 1390827_at   | "Smad3"                | " -7.7825" | "0.00833098" |
| 1387782_at   | "Dynll2"               | " -7.7812" | "0.00835172" |
| 1392465_at   | "Sap18"                | " -7.7798" | "0.00837285" |

|              |                      |         |            |
|--------------|----------------------|---------|------------|
| 1378705_at   | RGD1310433_predicted | 7.229   | 0.00002121 |
| 1373215_at   | Abr_predicted        | 7.2265  | 0.00002128 |
| 1373502_at   | Dym_predicted        | 7.2268  | 0.00002128 |
| 1394460_at   | NA                   | 7.2258  | 0.00002128 |
| 1384310_at   | NA                   | 7.2259  | 0.00002128 |
| 1380544_at   | NA                   | 7.2214  | 0.00002143 |
| 1390502_at   | RGD1309104_predicted | 7.2209  | 0.00002143 |
| 1388695_at   | Shmt2                | -7.2218 | 0.00002143 |
| 1389172_at   | NA                   | 7.2196  | 0.00002147 |
| 1368247_at   | Hspa1a               | -7.2188 | 0.00002148 |
| 1377021_at   | RGD1308877_predicted | -7.2189 | 0.00002148 |
| 1372534_at   | Bhmt                 | -7.2156 | 0.00002155 |
| 1373189_at   | Mkl1_predicted       | 7.2157  | 0.00002155 |
| 1383232_at   | NA                   | -7.2166 | 0.00002155 |
| 1373690_at   | NA                   | -7.2156 | 0.00002155 |
| 1396386_at   | Bace2                | -7.2141 | 0.00002159 |
| 1387780_at   | Dnaja2               | -7.2141 | 0.00002159 |
| 1377968_at   | NA                   | 7.2129  | 0.00002162 |
| 1373866_at   | RGD1359509           | -7.2125 | 0.00002162 |
| 1370925_at   | LOC291411            | 7.2117  | 0.00002163 |
| 1376168_at   | Tmem32_predicted     | -7.2116 | 0.00002163 |
| 1374293_at   | LOC690795            | -7.211  | 0.00002164 |
| 1398781_at   | Atp6v1f              | -7.2079 | 0.00002174 |
| 1375425_at   | RGD1309400_predicted | -7.2082 | 0.00002174 |
| 1388861_at   | RGD1307896_predicted | -7.206  | 0.0000218  |
| 1380067_at   | Myo5c_predicted      | 7.2047  | 0.00002184 |
| 1376862_at   | Ube4b_predicted      | 7.2042  | 0.00002185 |
| 1391454_at   | RGD1565584_predicted | -7.2026 | 0.0000219  |
| 1398916_at   | Aurkaip1             | -7.2009 | 0.00002194 |
| 1383896_at   | LOC683504            | -7.201  | 0.00002194 |
| 1373113_at   | NA                   | 7.1953  | 0.00002216 |
| 1383466_at   | NA                   | -7.194  | 0.00002217 |
| 1373588_at   | RGD1310323           | -7.1945 | 0.00002217 |
| 1379245_at   | Txndc9               | -7.1945 | 0.00002217 |
| 1389491_at   | NA                   | 7.192   | 0.00002224 |
| 1371486_at   | Snrp1c_predicted     | -7.1904 | 0.00002229 |
| 1374462_at   | Kifap3_predicted     | 7.1883  | 0.00002237 |
| 1393584_at   | Tnfrsf21_predicted   | -7.188  | 0.00002237 |
| 1372036_at   | Cd2bp2_predicted     | -7.1865 | 0.00002242 |
| 1371682_at   | Map1lc3a             | -7.1811 | 0.0000226  |
| 1384122_at   | NA                   | -7.1814 | 0.0000226  |
| 1375751_at   | NA                   | -7.1812 | 0.0000226  |
| 1377720_x_at | NA                   | 7.1782  | 0.00002271 |
| 1395696_at   | RGD1306613_predicted | -7.1757 | 0.0000228  |
| 1384871_at   | Osbpl6_predicted     | 7.1742  | 0.00002285 |
| 1371002_at   | Pdcd2                | -7.1707 | 0.00002299 |
| 1388399_at   | Mast2_predicted      | 7.1701  | 0.000023   |
| 1389983_at   | RGD1309387           | -7.1675 | 0.0000231  |
| 1379257_at   | Epb4.1l4a_predicted  | 7.165   | 0.00002318 |
| 1393079_at   | Siae_predicted       | 7.1652  | 0.00002318 |



|              |                        |           |              |
|--------------|------------------------|-----------|--------------|
| 1384032_at   | NA                     | "-7.7786" | "0.00839283" |
| 1388108_at   | "Elovl6"               | "7.7763"  | "0.00842870" |
| 1368012_at   | "Tep1"                 | "7.7760"  | "0.00843418" |
| 1395802_at   | "LOC685144"            | "-7.7720" | "0.00849722" |
| 1394808_at   | "Tm9sf4"               | "-7.7719" | "0.00849847" |
| 1371434_at   | NA                     | "-7.7712" | "0.00850929" |
| 1373695_at   | NA                     | "-7.7702" | "0.00852478" |
| 1382811_at   | NA                     | "-7.7692" | "0.00854200" |
| 1374326_at   | "Ppan"                 | "-7.7678" | "0.00856447" |
| 1376001_at   | "Prf1_predicted"       | "-7.7627" | "0.00864642" |
| 1390799_at   | NA                     | "7.7602"  | "0.00868672" |
| 1374699_at   | "RGD1305779_predicted" | "-7.7588" | "0.00870971" |
| 1376974_at   | "Ttc7"                 | "7.7575"  | "0.00873050" |
| 1373182_at   | NA                     | "7.7559"  | "0.00875755" |
| 1374129_at   | "RGD1562933_predicted" | "7.7547"  | "0.00877638" |
| 1388389_at   | "Sept2"                | "-7.7533" | "0.00879949" |
| 1378092_at   | "RGD1311147_predicted" | "7.7512"  | "0.00883451" |
| 1373848_at   | "RGD1308584_predicted" | "-7.7509" | "0.00883931" |
| 1375895_at   | NA                     | "-7.7495" | "0.00886243" |
| 1388622_at   | "RGD1563521_predicted" | "-7.7448" | "0.00894153" |
| 1372815_at   | "Magoh_predicted"      | "-7.7424" | "0.00898120" |
| 1370300_at   | "Preb"                 | "-7.7412" | "0.00900182" |
| 1389472_at   | "RGD1311526_predicted" | "-7.7388" | "0.00904273" |
| 1378634_at   | "Hdac8_predicted"      | "7.7359"  | "0.00909193" |
| 1368249_at   | "Klf15"                | "7.7342"  | "0.00912103" |
| 1388155_at   | "Krt1-18"              | "-7.7338" | "0.00912833" |
| 1373052_at   | "Pdcl3"                | "-7.7336" | "0.00913216" |
| 1377703_at   | "RGD1310316"           | "-7.7308" | "0.00918060" |
| 1374040_at   | "Nek9_predicted"       | "-7.7276" | "0.00923530" |
| 1374491_at   | "Cmtm8"                | "7.7261"  | "0.00926059" |
| 1398903_at   | "Esd"                  | "7.7218"  | "0.00933611" |
| 1388424_at   | "Eif3s1_predicted"     | "-7.7178" | "0.00940603" |
| 1378898_at   | "Ddx19"                | "-7.7170" | "0.00942102" |
| 1369854_a_at | "Ceacam1"              | "-7.7144" | "0.00946737" |
| 1386162_at   | "Txk"                  | "-7.7121" | "0.00950852" |
| 1372199_at   | "Pink1_predicted"      | "7.7106"  | "0.00953581" |
| 1388586_at   | "Synj1"                | "7.7105"  | "0.00953694" |
| 1397772_at   | NA                     | "-7.7103" | "0.00954081" |
| 1379801_at   | NA                     | "7.7075"  | "0.00959153" |
| 1371505_at   | "Hnrpc"                | "-7.7069" | "0.00960267" |
| 1372743_at   | "Snx5_predicted"       | "7.7059"  | "0.00961944" |
| 1380835_at   | "Isg20l2"              | "-7.7038" | "0.00965797" |
| 1383469_at   | NA                     | "-7.7022" | "0.00968694" |
| 1380030_at   | "Znf593_predicted"     | "-7.7016" | "0.00969759" |
| 1374082_at   | "RGD1311578"           | "-7.6978" | "0.00976694" |
| 1398837_at   | "Tceb2"                | "-7.6974" | "0.00977561" |
| 1371188_a_at | "Ubtf"                 | "-7.6964" | "0.00979309" |
| 1392858_at   | "LOC689116"            | "7.6953"  | "0.00981297" |
| 1372262_at   | NA                     | "7.6910"  | "0.00989402" |
| 1373337_at   | "Grhpr_predicted"      | "7.6883"  | "0.00994477" |

|              |                      |             |            |
|--------------|----------------------|-------------|------------|
| 1391476_at   | NA                   | 7.1637      | 0.00002322 |
| 1374245_at   | LOC363251            | 7.1604      | 0.00002335 |
| 1398960_at   | Cct6a                | -7.1592     | 0.00002337 |
| 1372794_at   | Dapk2                | 7.1586      | 0.00002337 |
| 1372607_at   | Nubp2                | -7.1585     | 0.00002337 |
| 1377474_at   | RGD1308317_predicted | -7.1583     | 0.00002337 |
| 1382114_at   | Tlk1_predicted       | 7.1589      | 0.00002337 |
| 1371546_at   | LOC361128            | -7.1567     | 0.00002342 |
| 1394086_at   | Senp7_predicted      | 7.1537      | 0.00002354 |
| 1372469_at   | LOC686310            | 7.1525      | 0.00002359 |
| 1371764_at   | MGC94113             | -7.1518     | 0.0000236  |
| 1389722_at   | NA                   | 7.1514      | 0.0000236  |
| 1388444_at   | Ubx2                 | -7.1499     | 0.00002365 |
| 1371488_at   | RGD1562079_predicted | -7.1493     | 0.00002367 |
| 1387775_at   | Gtf2a2               | -7.1483     | 0.00002369 |
| 1379811_at   | Pde4dip              | 7.1481      | 0.00002369 |
| 1367698_a_at |                      | 40057 7.145 | 0.00002381 |
| 1388488_at   | Lsm3_predicted       | -7.1448     | 0.00002381 |
| 1379429_at   | Tmed5                | -7.1439     | 0.00002383 |
| 1376852_at   | Mccc1                | 7.1417      | 0.00002392 |
| 1398819_at   | Dnaja1               | -7.1398     | 0.00002399 |
| 1387116_at   | Dnajb9               | -7.1381     | 0.00002405 |
| 1377577_at   | Gmps                 | -7.1328     | 0.00002425 |
| 1373854_at   | NA                   | 7.1334      | 0.00002425 |
| 1369642_at   | Pafah1b2             | -7.1331     | 0.00002425 |
| 1371399_at   | LOC681123            | -7.1285     | 0.00002443 |
| 1389372_at   | RGD1308489_predicted | 7.1268      | 0.00002449 |
| 1368936_at   | Txn1                 | -7.1263     | 0.0000245  |
| 1372619_at   | Mrpl49               | -7.1247     | 0.00002456 |
| 1372119_at   | Ube1dc1              | -7.1241     | 0.00002457 |
| 1372266_at   | Rev3l                | 7.123       | 0.00002461 |
| 1373382_at   | RGD1306324           | -7.1202     | 0.00002473 |
| 1374122_at   | Myo5c_predicted      | 7.1196      | 0.00002474 |
| 1383151_at   | Akap9                | 7.1168      | 0.00002485 |
| 1375357_at   | Dyt1                 | -7.1115     | 0.00002509 |
| 1398369_at   | NA                   | 7.1105      | 0.00002512 |
| 1370316_at   | Hspbp1               | -7.1097     | 0.00002513 |
| 1377696_at   | Mesdc1               | -7.1096     | 0.00002513 |
| 1367517_at   | NA                   | 7.1089      | 0.00002515 |
| 1377576_at   | Ppa2_predicted       | 7.1051      | 0.00002531 |
| 1389216_at   | NA                   | 7.1039      | 0.00002536 |
| 1371027_at   | Cblb                 | 7.1024      | 0.00002539 |
| 1395488_at   | Msh3                 | 7.1028      | 0.00002539 |
| 1388865_at   | Ppp4r2_predicted     | -7.1018     | 0.00002539 |
| 1386905_at   | Prkar1a              | -7.1021     | 0.00002539 |
| 1388983_at   | RGD1305045_predicted | -7.1009     | 0.00002542 |
| 1397706_at   | NA                   | 7.0992      | 0.00002547 |
| 1372917_at   | RGD1306819           | -7.0997     | 0.00002547 |
| 1377649_at   | NA                   | 7.0967      | 0.00002558 |
| 1389529_at   | NA                   | 7.0962      | 0.00002559 |

|              |                        |            |              |
|--------------|------------------------|------------|--------------|
| 1379335_at   | "Paip1_predicted"      | " -7.6881" | "0.00994880" |
| 1387833_at   | "Tmprss2"              | " -7.6832" | "0.01003968" |
| 1390962_at   | NA                     | " -7.6744" | "0.01020744" |
| 1376916_at   | "Zbtb2_predicted"      | " -7.6720" | "0.01025460" |
| 1392853_at   | NA                     | " -7.6656" | "0.01037998" |
| 1383138_at   | "Ssh3"                 | " -7.6613" | "0.01046347" |
| 1392902_at   | "RGD1306067"           | " -7.6599" | "0.01049231" |
| 1377757_at   | "Shprh_predicted"      | " -7.6578" | "0.01053328" |
| 1367713_at   | "Eif2s1"               | " -7.6566" | "0.01055745" |
| 1377779_at   | "Pdcl3"                | " -7.6565" | "0.01055858" |
| 1391016_at   | "LOC690654"            | " 7.6545"  | "0.01059816" |
| 1383265_at   | "Tbc1d23_predicted"    | " 7.6545"  | "0.01060008" |
| 1395036_at   | "Impad1"               | " -7.6529" | "0.01063179" |
| 1388720_at   | NA                     | " 7.6493"  | "0.01070425" |
| 1389428_at   | "F10"                  | " -7.6425" | "0.01084276" |
| 1372364_a_at | "RGD1305160"           | " 7.6421"  | "0.01085015" |
| 1399122_at   | NA                     | " 7.6412"  | "0.01086991" |
| 1372787_at   | "Criz1"                | " -7.6407" | "0.01087968" |
| 1371455_at   | "Pmm1"                 | " 7.6387"  | "0.01092083" |
| 1376351_at   | NA                     | " -7.6350" | "0.01099747" |
| 1398421_at   | NA                     | " 7.6340"  | "0.01101746" |
| 1367714_at   | "Eif2b2"               | " -7.6334" | "0.01102952" |
| 1386879_at   | "Lgals3"               | " 7.6326"  | "0.01104677" |
| 1395146_at   | "Adipor2"              | " -7.6321" | "0.01105688" |
| 1373164_at   | NA                     | " 7.6319"  | "0.01106147" |
| 1391636_at   | NA                     | " -7.6305" | "0.01109146" |
| 1367613_at   | "Prdx1"                | " -7.6303" | "0.01109611" |
| 1383712_at   | "Rxrg"                 | " -7.6272" | "0.01116062" |
| 1369562_at   | "Hpcal1"               | " -7.6252" | "0.01120370" |
| 1376519_at   | "Brp16"                | " -7.6240" | "0.01122927" |
| 1376679_at   | NA                     | " -7.6216" | "0.01127864" |
| 1397535_at   | "Mpp5_predicted"       | " 7.6210"  | "0.01129261" |
| 1373768_at   | "Bms1l"                | " -7.6205" | "0.01130382" |
| 1367798_at   | "Ahcy"                 | " 7.6199"  | "0.01131618" |
| 1373653_at   | "Papd1_predicted"      | " -7.6194" | "0.01132742" |
| 1396933_s_at | "LOC191574"            | " 7.6185"  | "0.01134702" |
| 1378080_at   | "RGD1559538_predicted" | " 7.6178"  | "0.01136127" |
| 1398300_at   | "Atp1b3"               | " -7.6138" | "0.01144851" |
| 1378930_a_at | "Rhoc_predicted"       | " 7.6134"  | "0.01145535" |
| 1373928_at   | "Il17re"               | " 7.6134"  | "0.01145666" |
| 1380777_at   | "Tsc22d3"              | " -7.6054" | "0.01163137" |
| 1367883_at   | "Smn1"                 | " -7.6037" | "0.01166887" |
| 1393502_at   | "RGD1306153"           | " -7.6037" | "0.01166928" |
| 1374133_at   | "Trit1_predicted"      | " -7.6013" | "0.01172226" |
| 1387925_at   | "Asns"                 | " -7.6007" | "0.01173499" |
| 1376562_at   | "RGD1561817_predicted" | " 7.5966"  | "0.01182694" |
| 1372943_at   | "LOC497952"            | " -7.5963" | "0.01183351" |
| 1387388_at   | "Chp"                  | " 7.5954"  | "0.01185377" |
| 1376242_at   | NA                     | " -7.5953" | "0.01185530" |
| 1388562_at   | "Stard7_predicted"     | " 7.5927"  | "0.01191570" |

|              |                      |         |            |
|--------------|----------------------|---------|------------|
| 1367493_at   | RGD1560212_predicted | -7.0955 | 0.00002561 |
| 1371812_at   | LOC362855            | -7.0921 | 0.00002575 |
| 1372760_at   | NA                   | 7.0917  | 0.00002576 |
| 1392571_at   | RGD1311340_predicted | 7.0879  | 0.00002593 |
| 1378900_at   | Gcn5l2_predicted     | -7.0825 | 0.00002618 |
| 1374797_at   | Eaf1_predicted       | -7.0808 | 0.00002625 |
| 1378068_at   | NA                   | -7.0802 | 0.00002626 |
| 1369686_at   | Dcamk1               | 7.0793  | 0.00002629 |
| 1392885_at   | Mbd1                 | -7.0777 | 0.00002635 |
| 1382310_at   | RGD1563296_predicted | 7.0772  | 0.00002637 |
| 1376585_at   | Mrpl50_predicted     | -7.0758 | 0.0000264  |
| 1373814_at   | RGD1310066           | 7.0758  | 0.0000264  |
| 1386065_at   | NA                   | -7.0729 | 0.00002652 |
| 1389550_at   | Sh3gl2               | 7.0729  | 0.00002652 |
| 1390461_at   | NA                   | 7.0706  | 0.00002661 |
| 1374931_at   | Mrpl40               | -7.0701 | 0.00002663 |
| 1376708_at   | LOC680422            | 7.0686  | 0.00002667 |
| 1374169_at   | RGD1310686           | 7.0686  | 0.00002667 |
| 1385804_x_at | LOC688637            | -7.068  | 0.00002668 |
| 1384256_at   | LOC686883            | -7.0663 | 0.0000267  |
| 1375423_at   | LOC689959            | -7.0667 | 0.0000267  |
| 1399140_at   | Rapgef1              | 7.0672  | 0.0000267  |
| 1392504_at   | RGD1306613_predicted | -7.0669 | 0.0000267  |
| 1372076_at   | Hbxip_predicted      | -7.0621 | 0.0000269  |
| 1388903_at   | Tcte1l               | -7.0571 | 0.00002714 |
| 1378007_at   | RGD1306148_predicted | 7.0559  | 0.00002719 |
| 1388829_at   | LOC361399            | -7.0535 | 0.00002726 |
| 1374368_at   | NA                   | 7.0538  | 0.00002726 |
| 1388567_at   | Thumpd1              | -7.0534 | 0.00002726 |
| 1376731_at   | NA                   | 7.0528  | 0.00002728 |
| 1379217_at   | NA                   | 7.0511  | 0.00002735 |
| 1371809_at   | Mrps18b              | -7.0495 | 0.00002742 |
| 1375944_at   | Acss2_predicted      | 7.0483  | 0.00002747 |
| 1397508_at   | Ddx18                | -7.0454 | 0.0000276  |
| 1379982_at   | NA                   | 7.0437  | 0.00002767 |
| 1383933_at   | RGD1308772_predicted | 7.0421  | 0.00002774 |
| 1383692_at   | LOC681037            | 7.0394  | 0.00002784 |
| 1377400_at   | NA                   | -7.0399 | 0.00002784 |
| 1387152_at   | Nrbf2                | -7.0392 | 0.00002784 |
| 1372364_a_at | RGD1305160           | -7.039  | 0.00002784 |
| 1368067_at   | Zfp148               | 7.0381  | 0.00002787 |
| 1397924_at   | NA                   | 7.035   | 0.00002802 |
| 1379153_at   | LOC362587            | -7.0345 | 0.00002803 |
| 1374483_at   | NA                   | -7.0331 | 0.00002808 |
| 1396752_at   | Tnfrsf21_predicted   | -7.0321 | 0.00002812 |
| 1391439_at   | NA                   | 7.0314  | 0.00002814 |
| 1385020_at   | LOC499339            | -7.0299 | 0.00002821 |
| 1370939_at   | Acs1                 | 7.0293  | 0.00002822 |
| 1370386_at   | Ruvbl1               | -7.0237 | 0.00002851 |
| 1372665_at   | Psat1                | -7.0226 | 0.00002855 |

|              |                        |            |              |
|--------------|------------------------|------------|--------------|
| 1396189_at   | NA                     | " -7.5926" | "0.01191692" |
| 1395642_at   | "Nol9"                 | " -7.5924" | "0.01192211" |
| 1369777_a_at | "Shank2"               | " 7.5922"  | "0.01192694" |
| 1367603_at   | "Tpi1"                 | " 7.5920"  | "0.01193110" |
| 1387058_at   | "Pctp"                 | " 7.5909"  | "0.01195566" |
| 1384087_at   | "RGD1561402_predicted" | " -7.5908" | "0.01195890" |
| 1381762_at   | "RGD1309120"           | " 7.5894"  | "0.01198979" |
| 1371019_at   | "Trib1"                | " -7.5887" | "0.01200513" |
| 1378887_at   | NA                     | " -7.5884" | "0.01201237" |
| 1398084_at   | "LOC501026"            | " -7.5867" | "0.01205088" |
| 1395508_at   | "Cct5"                 | " -7.5837" | "0.01212057" |
| 1371447_at   | "Plac8_predicted"      | " -7.5833" | "0.01212881" |
| 1379365_at   | "Cxcl11"               | " 7.5826"  | "0.01214539" |
| 1367543_at   | "LOC685079"            | " -7.5800" | "0.01220495" |
| 1389559_at   | NA                     | " 7.5786"  | "0.01223848" |
| 1388251_at   | "Prkci"                | " 7.5766"  | "0.01228590" |
| 1398299_at   | "Arhgef11"             | " 7.5760"  | "0.01229992" |
| 1372372_at   | "RGD1306952"           | " 7.5731"  | "0.01236684" |
| 1392916_at   | "Mtap7_predicted"      | " 7.5707"  | "0.01242411" |
| 1383999_at   | NA                     | " 7.5694"  | "0.01245387" |
| 1377480_at   | "RGD1308076"           | " -7.5644" | "0.01257370" |
| 1368203_at   | "Scnn1a"               | " -7.5627" | "0.01261456" |
| 1388294_at   | "Sdhd"                 | " 7.5622"  | "0.01262489" |
| 1394630_at   | "Lmo4"                 | " -7.5610" | "0.01265331" |
| 1383516_at   | "Fgl2"                 | " 7.5608"  | "0.01265972" |
| 1376111_at   | NA                     | " 7.5605"  | "0.01266544" |
| 1374254_a_at | "RGD1563250_predicted" | " 7.5597"  | "0.01268671" |
| 1389040_at   | NA                     | " -7.5571" | "0.01274828" |
| 1372741_at   | "Sccpdh"               | " 7.5560"  | "0.01277559" |
| 1368538_at   | "Exoc7"                | " -7.5559" | "0.01277901" |
| 1376592_at   | "Mcee_predicted"       | " 7.5537"  | "0.01283208" |
| 1388611_at   | "Tcea3"                | " 7.5531"  | "0.01284535" |
| 1394205_at   | "Silk"                 | " -7.5527" | "0.01285513" |
| 1382536_at   | "Thrap2_predicted"     | " 7.5447"  | "0.01305369" |
| 1398798_at   | "Metap2"               | " -7.5417" | "0.01312864" |
| 1387950_at   | "Nip7"                 | " -7.5393" | "0.01318692" |
| 1367519_at   | "Osbp12"               | " -7.5393" | "0.01318895" |
| 1390838_at   | NA                     | " 7.5389"  | "0.01319733" |
| 1368029_at   | "Gnai3"                | " -7.5330" | "0.01334647" |
| 1371999_at   | NA                     | " -7.5312" | "0.01339368" |
| 1388957_at   | NA                     | " -7.5309" | "0.01340118" |
| 1388889_at   | "Fyna"                 | " 7.5283"  | "0.01346650" |
| 1372633_at   | "Spg20"                | " -7.5274" | "0.01349023" |
| 1398554_at   | "Atp6v0b_predicted"    | " -7.5221" | "0.01362641" |
| 1367487_at   | "B4galt3"              | " -7.5208" | "0.01366076" |
| 1398913_at   | "Numa1"                | " 7.5194"  | "0.01369901" |
| 1391162_at   | NA                     | " 7.5183"  | "0.01372691" |
| 1389809_at   | NA                     | " -7.5177" | "0.01374182" |
| 1387344_at   | "Aldh6a1"              | " 7.5171"  | "0.01375778" |
| 1380242_at   | "Lrp5_predicted"       | " 7.5148"  | "0.01381758" |

|              |                      |         |            |
|--------------|----------------------|---------|------------|
| 1378031_at   | Dhx37_predicted      | -7.0211 | 0.00002862 |
| 1388201_at   | Bmp6                 | 7.0177  | 0.00002878 |
| 1389004_at   | Josd2_predicted      | -7.0164 | 0.00002884 |
| 1399167_a_at | NA                   | 7.0127  | 0.00002902 |
| 1376322_at   | Sfxn5                | 7.0103  | 0.00002914 |
| 1398415_at   | NA                   | 7.009   | 0.00002919 |
| 1374152_at   | Wdr46                | -7.0087 | 0.00002919 |
| 1378590_at   | NA                   | 7.0042  | 0.00002942 |
| 1379043_at   | NA                   | -7.0039 | 0.00002943 |
| 1373875_at   | RGD1308261_predicted | -7.0033 | 0.00002944 |
| 1371445_at   | Lrrc59               | -7.0027 | 0.00002946 |
| 1399113_at   | NA                   | 7.0017  | 0.0000295  |
| 1388339_at   | Pea15                | -7.0009 | 0.00002953 |
| 1372721_at   | Zfpn1a2_predicted    | -6.9998 | 0.00002957 |
| 1374241_at   | NA                   | 6.9984  | 0.00002963 |
| 1375525_at   | Mapre1               | -6.9974 | 0.00002966 |
| 1370354_at   | Parg                 | 6.9973  | 0.00002966 |
| 1393310_at   | NA                   | 6.9931  | 0.00002988 |
| 1379263_at   | Fkrp                 | -6.9921 | 0.00002992 |
| 1392573_at   | Ube2a                | -6.9911 | 0.00002996 |
| 1398860_at   | Nedd8                | -6.9902 | 0.00002999 |
| 1377619_at   | LOC688637            | -6.9857 | 0.00003023 |
| 1386900_at   | RAMP4                | -6.9835 | 0.00003034 |
| 1373546_at   | Ua20                 | 6.9827  | 0.00003037 |
| 1367960_at   | Arl4a                | -6.9822 | 0.00003038 |
| 1378070_at   | NA                   | -6.9814 | 0.00003041 |
| 1390343_at   | Ccnc                 | -6.9808 | 0.00003043 |
| 1384479_at   | Galnt3               | -6.9801 | 0.00003045 |
| 1393066_at   | Cdh1                 | 6.9791  | 0.00003049 |
| 1374639_at   | LOC287522            | 6.976   | 0.00003065 |
| 1377937_at   | Mrps14_predicted     | -6.9744 | 0.00003071 |
| 1385667_x_at | NA                   | 6.9748  | 0.00003071 |
| 1388830_at   | Pkn2                 | 6.974   | 0.00003072 |
| 1374000_at   | Helz_predicted       | 6.9733  | 0.00003073 |
| 1374316_at   | LOC686980            | -6.9732 | 0.00003073 |
| 1372705_at   | Cherp_predicted      | -6.9724 | 0.00003076 |
| 1388677_at   | Ubap1                | -6.9712 | 0.00003081 |
| 1368341_at   | Polb                 | -6.97   | 0.00003083 |
| 1388466_at   | Psmc3                | -6.9707 | 0.00003083 |
| 1382729_at   | RGD1564019_predicted | 6.9702  | 0.00003083 |
| 1372543_at   | RGD1562502_predicted | -6.9659 | 0.00003105 |
| 1371653_at   | Tpm4                 | -6.964  | 0.00003115 |
| 1384296_at   | NA                   | 6.9623  | 0.00003121 |
| 1389199_at   | RGD1309079           | -6.9625 | 0.00003121 |
| 1371449_at   | Pin1_predicted       | -6.9619 | 0.00003122 |
| 1367686_at   | RAMP4                | -6.9592 | 0.00003136 |
| 1382944_at   | Igsf6                | 6.9566  | 0.00003148 |
| 1373312_at   | NA                   | 6.9568  | 0.00003148 |
| 1372433_at   | RGD1310211_predicted | -6.9556 | 0.0000315  |
| 1388346_at   | RGD1560953_predicted | -6.9557 | 0.0000315  |

|              |                        |            |              |
|--------------|------------------------|------------|--------------|
| 1391131_at   | NA                     | " -7.5136" | "0.01384966" |
| 1386904_a_at | "Cyb5"                 | " 7.5119"  | "0.01389413" |
| 1394535_at   | "Kif16b_predicted"     | " 7.5092"  | "0.01396774" |
| 1389153_at   | "Serbp1"               | " -7.5073" | "0.01401805" |
| 1378208_at   | NA                     | " 7.5051"  | "0.01407819" |
| 1392514_at   | "Bxdc1_predicted"      | " -7.5047" | "0.01408840" |
| 1398932_at   | "LOC690660"            | " 7.5025"  | "0.01414635" |
| 1375889_at   | "Sms"                  | " -7.5023" | "0.01415134" |
| 1371483_at   | "Nnt"                  | " -7.5000" | "0.01421503" |
| 1379286_at   | NA                     | " 7.5000"  | "0.01421560" |
| 1373765_at   | NA                     | " 7.4974"  | "0.01428492" |
| 1374484_at   | "Tmem39a"              | " -7.4925" | "0.01441875" |
| 1372218_at   | "Wdr12"                | " -7.4924" | "0.01442218" |
| 1383667_at   | "Rundc1_predicted"     | " -7.4920" | "0.01443286" |
| 1368509_at   | "Bbs2"                 | " 7.4910"  | "0.01446018" |
| 1387087_at   | "Cebp"                 | " -7.4887" | "0.01452545" |
| 1369644_at   | "Lphn2"                | " -7.4879" | "0.01454681" |
| 1389961_at   | "Sdccag3"              | " -7.4869" | "0.01457618" |
| 1368055_a_at | "Lmna"                 | " -7.4854" | "0.01461623" |
| 1372722_at   | NA                     | " -7.4837" | "0.01466479" |
| 1388933_at   | NA                     | " 7.4818"  | "0.01471757" |
| 1391193_at   | "RGD1560656_predicted" | " -7.4763" | "0.01487291" |
| 1372039_at   | "Nkiras2_predicted"    | " 7.4743"  | "0.01493080" |
| 1391739_at   | "Rundc1_predicted"     | " -7.4707" | "0.01503401" |
| 1387797_at   | "Rab7"                 | " 7.4698"  | "0.01506095" |
| 1377307_at   | "RGD1309879"           | " 7.4690"  | "0.01508181" |
| 1379264_at   | "Znrf1_predicted"      | " 7.4678"  | "0.01511806" |
| 1373733_at   | "Bok"                  | " 7.4672"  | "0.01513564" |
| 1389608_at   | "Abcf2_predicted"      | " -7.4666" | "0.01515354" |
| 1396160_at   | NA                     | " -7.4654" | "0.01518638" |
| 1391378_at   | "Lpin2_predicted"      | " 7.4622"  | "0.01528013" |
| 1389683_at   | NA                     | " -7.4614" | "0.01530266" |
| 1378181_at   | "Rpp40"                | " -7.4602" | "0.01533857" |
| 1393572_at   | "Zfp592_predicted"     | " -7.4566" | "0.01544507" |
| 1394738_at   | NA                     | " 7.4545"  | "0.01550716" |
| 1370191_at   | "Azin1"                | " -7.4540" | "0.01552235" |
| 1382756_at   | "Kpna1"                | " -7.4531" | "0.01554795" |
| 1376043_at   | "MGC94192"             | " -7.4509" | "0.01561418" |
| 1388502_at   | "Inpp5b"               | " 7.4487"  | "0.01568100" |
| 1373690_at   | NA                     | " -7.4465" | "0.01574685" |
| 1370321_at   | "Pcd8"                 | " 7.4461"  | "0.01575834" |
| 1376655_at   | NA                     | " -7.4432" | "0.01584769" |
| 1392099_at   | "Plcl3_predicted"      | " 7.4414"  | "0.01590077" |
| 1385660_at   | "RGD1309059_predicted" | " -7.4392" | "0.01596775" |
| 1373647_at   | "Zfp622"               | " -7.4379" | "0.01600830" |
| 1395704_at   | NA                     | " 7.4357"  | "0.01607791" |
| 1384873_at   | "Stim1_predicted"      | " -7.4330" | "0.01616131" |
| 1370563_at   | "LOC191574"            | " 7.4281"  | "0.01631327" |
| 1371419_at   | "Spnb2"                | " 7.4275"  | "0.01633043" |
| 1371706_at   | "Sdccag3"              | " -7.4227" | "0.01648227" |

|              |                      |         |            |
|--------------|----------------------|---------|------------|
| 1398342_at   | LOC501052            | -6.9546 | 0.00003153 |
| 1390866_at   | NA                   | -6.9548 | 0.00003153 |
| 1374602_at   | Tspyl                | -6.9542 | 0.00003154 |
| 1374958_at   | Adpgk                | -6.9535 | 0.00003156 |
| 1389022_at   | Fxna                 | 6.9529  | 0.00003158 |
| 1388842_at   | Srf_predicted        | -6.952  | 0.00003161 |
| 1376418_a_at | lars_predicted       | -6.9515 | 0.00003163 |
| 1380219_at   | Hmgn2                | -6.9475 | 0.00003183 |
| 1393689_at   | Ndufaf1_predicted    | -6.9475 | 0.00003183 |
| 1371963_at   | Pcca                 | 6.9473  | 0.00003183 |
| 1388325_at   | Atp6v1d              | -6.9423 | 0.00003211 |
| 1373888_at   | Ap3b1_predicted      | 6.941   | 0.00003218 |
| 1374594_at   | LOC363060            | -6.9397 | 0.00003224 |
| 1383160_at   | Chordc1_predicted    | -6.9367 | 0.0000324  |
| 1377632_at   | LOC680130            | 6.9346  | 0.00003251 |
| 1388986_at   | NA                   | -6.9325 | 0.00003261 |
| 1390268_at   | Rab35                | -6.9328 | 0.00003261 |
| 1395721_at   | Papss2_predicted     | 6.932   | 0.00003262 |
| 1398770_at   | Rpl36a               | -6.9315 | 0.00003264 |
| 1380975_at   | RGD1564074_predicted | 6.9294  | 0.00003275 |
| 1388401_at   | Flnb_predicted       | 6.9269  | 0.00003289 |
| 1376651_at   | NA                   | 6.9232  | 0.0000331  |
| 1373364_at   | Eif4g3_predicted     | 6.9202  | 0.00003323 |
| 1367672_at   | Hsd17b4              | 6.9205  | 0.00003323 |
| 1383063_a_at | NA                   | 6.9207  | 0.00003323 |
| 1378906_at   | RGD1559690_predicted | -6.9144 | 0.00003358 |
| 1378345_at   | NA                   | -6.9133 | 0.00003363 |
| 1374935_at   | NA                   | 6.9132  | 0.00003363 |
| 1387126_at   | Atp2c1               | 6.9098  | 0.00003383 |
| 1383271_at   | Ccdc59_predicted     | -6.9085 | 0.00003389 |
| 1397210_at   | LOC679869            | 6.9065  | 0.00003398 |
| 1373895_at   | NA                   | -6.9067 | 0.00003398 |
| 1398771_at   | Slc3a2               | -6.905  | 0.00003406 |
| 1389137_at   | Cit                  | 6.9025  | 0.00003421 |
| 1392083_at   | LOC299907            | 6.902   | 0.00003422 |
| 1370171_at   | Hnrpu                | -6.9004 | 0.00003425 |
| 1389733_at   | NA                   | -6.9003 | 0.00003425 |
| 1372962_at   | Tarbp2               | -6.9008 | 0.00003425 |
| 1383949_at   | Thrap2_predicted     | 6.9007  | 0.00003425 |
| 1389080_at   | Rbm14                | -6.9    | 0.00003426 |
| 1391411_at   | RGD1560248_predicted | 6.8987  | 0.00003433 |
| 1371857_at   | Kctd10               | -6.897  | 0.00003442 |
| 1377787_at   | RGD1560367_predicted | 6.8966  | 0.00003442 |
| 1398946_at   | LOC688912            | -6.8962 | 0.00003443 |
| 1386982_at   | Mgat2                | -6.8951 | 0.00003449 |
| 1382387_at   | Tmem16a_predicted    | 6.8947  | 0.00003449 |
| 1372506_at   | Psme3                | -6.8922 | 0.00003463 |
| 1384056_at   | NA                   | 6.8909  | 0.0000347  |
| 1388468_at   | Cdc42se1             | -6.8898 | 0.00003476 |
| 1387448_at   | Bet1l                | -6.8869 | 0.00003493 |

|              |                        |            |              |
|--------------|------------------------|------------|--------------|
| 1378524_at   | "Rnf19_predicted"      | " -7.4190" | "0.01660130" |
| 1394509_at   | NA                     | " -7.4184" | "0.01661970" |
| 1379897_at   | NA                     | " -7.4177" | "0.01664334" |
| 1377400_at   | "Hrb2_predicted"       | " -7.4124" | "0.01681151" |
| 1392971_at   | NA                     | " -7.4085" | "0.01694018" |
| 1372121_at   | "Usp9x_predicted"      | " 7.4068"  | "0.01699520" |
| 1372306_at   | "Ethe1_predicted"      | " 7.4062"  | "0.01701541" |
| 1380431_at   | "RGD1308772_predicted" | " 7.4048"  | "0.01706097" |
| 1375493_at   | "Vangl2_predicted"     | " -7.4041" | "0.01708138" |
| 1387901_at   | "Ptprd"                | " -7.4028" | "0.01712588" |
| 1388465_at   | "RGD1359600"           | " 7.4027"  | "0.01712797" |
| 1390392_at   | "RGD1309602_predicted" | " -7.4025" | "0.01713419" |
| 1383159_at   | NA                     | " 7.4025"  | "0.01713669" |
| 1392116_at   | "RGD1311316"           | " -7.4022" | "0.01714589" |
| 1374232_at   | "Pik3ca"               | " -7.4006" | "0.01719699" |
| 1388798_at   | "Ube2e2"               | " 7.3984"  | "0.01726965" |
| 1387566_at   | "Pla2g4a"              | " 7.3984"  | "0.01727263" |
| 1395325_s_at | "Tmem32_predicted"     | " -7.3972" | "0.01730949" |
| 1387407_at   | "Nap1l3"               | " -7.3956" | "0.01736509" |
| 1368778_at   | "Slc6a6"               | " 7.3947"  | "0.01739408" |
| 1391183_at   | "Gopc_predicted"       | " -7.3901" | "0.01754864" |
| 1376502_at   | "RGD1309228"           | " -7.3866" | "0.01766896" |
| 1389450_at   | "LOC368084"            | " -7.3853" | "0.01771143" |
| 1370648_a_at | "Cr16"                 | " 7.3841"  | "0.01775156" |
| 1372853_at   | "Rela"                 | " -7.3810" | "0.01786024" |
| 1368184_at   | "Psmid9"               | " -7.3800" | "0.01789422" |
| 1378840_at   | NA                     | " -7.3786" | "0.01794276" |
| 1384143_at   | "Cgn_predicted"        | " 7.3772"  | "0.01798909" |
| 1369182_at   | "F3"                   | " -7.3760" | "0.01803307" |
| 1389409_at   | "LOC500040"            | " -7.3741" | "0.01809905" |
| 1387120_at   | "Psmc3"                | " -7.3717" | "0.01818368" |
| 1398955_at   | "Cops8"                | " -7.3695" | "0.01825881" |
| 1383548_at   | "Ankrd49_predicted"    | " -7.3686" | "0.01829285" |
| 1371596_at   | "Rnps1"                | " -7.3678" | "0.01831840" |
| 1370876_at   | "LOC681287"            | " -7.3671" | "0.01834492" |
| 1376304_at   | NA                     | " -7.3664" | "0.01836768" |
| 1382660_at   | "RGD1563084_predicted" | " 7.3661"  | "0.01837900" |
| 1372552_at   | "Acdb3"                | " -7.3655" | "0.01840057" |
| 1368121_at   | "Akr7a3"               | " 7.3644"  | "0.01844088" |
| 1380241_a_at | "Lrp5_predicted"       | " 7.3641"  | "0.01845020" |
| 1396279_at   | "Atp6ap2"              | " -7.3625" | "0.01850862" |
| 1390022_at   | "Arpc5"                | " -7.3620" | "0.01852396" |
| 1380120_at   | "Mtap7_predicted"      | " 7.3617"  | "0.01853563" |
| 1387194_at   | "Centa1"               | " 7.3594"  | "0.01861847" |
| 1387502_at   | "Stk17b"               | " 7.3580"  | "0.01866855" |
| 1371344_at   | "RGD1562402_predicted" | " -7.3562" | "0.01873230" |
| 1372496_at   | "RGD1561264_predicted" | " -7.3520" | "0.01888584" |
| 1388937_at   | "Rnf19_predicted"      | " -7.3510" | "0.01892304" |
| 1382220_at   | "RGD1305614_predicted" | " 7.3467"  | "0.01907911" |
| 1377926_at   | "Centg2_predicted"     | " 7.3459"  | "0.01910922" |

|              |                      |         |            |
|--------------|----------------------|---------|------------|
| 1375278_at   | Trim2                | 6.8865  | 0.00003494 |
| 1372453_at   | Dr1                  | -6.8839 | 0.00003509 |
| 1397729_x_at | LOC363060            | -6.8836 | 0.00003509 |
| 1371681_at   | RGD708449            | -6.8834 | 0.00003509 |
| 1376771_at   | NA                   | 6.8816  | 0.00003519 |
| 1398336_at   | Rnf25                | -6.8814 | 0.00003519 |
| 1398300_at   | Atp1b3               | -6.8808 | 0.0000352  |
| 1375353_at   | Cables1_predicted    | 6.8805  | 0.00003521 |
| 1367526_at   | Mrps26_predicted     | -6.8797 | 0.00003524 |
| 1371585_at   | Gspt1                | -6.8785 | 0.0000353  |
| 1393983_at   | Xpot_predicted       | -6.8776 | 0.00003534 |
| 1398889_at   | Grin1a               | -6.8762 | 0.00003542 |
| 1389065_at   | Rbm34                | -6.8759 | 0.00003542 |
| 1390728_at   | Limd1_predicted      | -6.8742 | 0.0000355  |
| 1373242_at   | LOC689030            | -6.8744 | 0.0000355  |
| 1391060_at   | NA                   | 6.8738  | 0.00003551 |
| 1391710_at   | Nme2                 | -6.8734 | 0.00003551 |
| 1374105_at   | Hig1                 | -6.8713 | 0.00003564 |
| 1389498_at   | Tysnd1_predicted     | -6.8704 | 0.00003568 |
| 1398833_at   | Mbtps1               | 6.8692  | 0.00003574 |
| 1383889_at   | NA                   | -6.8679 | 0.00003581 |
| 1371348_at   | Psmb5                | -6.8603 | 0.00003632 |
| 1387030_at   | Abcc5                | 6.8585  | 0.00003642 |
| 1379238_at   | Ctdspl_predicted     | 6.8571  | 0.0000365  |
| 1372502_at   | NA                   | 6.8542  | 0.00003668 |
| 1387982_at   | Tlr4                 | -6.8508 | 0.00003691 |
| 1374920_at   | NA                   | 6.8495  | 0.00003698 |
| 1394397_at   | LOC302898            | -6.8477 | 0.00003709 |
| 1371650_at   | Senp3                | -6.8399 | 0.00003762 |
| 1377096_at   | Mtfmt                | 6.8391  | 0.00003766 |
| 1399106_at   | LOC681389            | -6.8376 | 0.00003775 |
| 1382565_at   | RGD1311455_predicted | -6.8348 | 0.00003794 |
| 1373094_at   | Gtf2h1_predicted     | -6.834  | 0.00003797 |
| 1383906_at   | LOC316326            | -6.8307 | 0.00003813 |
| 1378552_at   | Map3k6_predicted     | -6.8308 | 0.00003813 |
| 1398913_at   | Numa1                | 6.831   | 0.00003813 |
| 1374716_at   | RGD1306106           | -6.8314 | 0.00003813 |
| 1374960_at   | RGD1564887_predicted | 6.828   | 0.0000383  |
| 1395991_at   | Rimbp2               | 6.8278  | 0.0000383  |
| 1376580_at   | Fxn_predicted        | -6.825  | 0.00003849 |
| 1388722_at   | Dnajb1_predicted     | -6.8185 | 0.00003893 |
| 1368018_at   | Mkin1                | 6.8183  | 0.00003893 |
| 1383239_at   | Zcchc7_predicted     | 6.8183  | 0.00003893 |
| 1374793_at   | Wdr3_predicted       | -6.815  | 0.00003916 |
| 1368005_at   | Itpr3                | 6.8122  | 0.00003934 |
| 1398951_at   | RGD1308009           | 6.8098  | 0.0000395  |
| 1377622_at   | Hbxap_predicted      | 6.8076  | 0.00003965 |
| 1373657_at   | Slc31a2              | -6.805  | 0.00003983 |
| 1370190_at   | H3f3b                | -6.8038 | 0.00003986 |
| 1395887_at   | LOC363060            | -6.8037 | 0.00003986 |

|              |                        |            |              |
|--------------|------------------------|------------|--------------|
| 1374629_at   | "Med8_predicted"       | " -7.3455" | "0.01912620" |
| 1370708_a_at | "LOC191574"            | " 7.3439"  | "0.01918578" |
| 1373603_at   | "RGD1565744_predicted" | " -7.3426" | "0.01923407" |
| 1372883_at   | "Cenpb_predicted"      | " -7.3423" | "0.01924251" |
| 1373263_at   | "LOC690257"            | " -7.3423" | "0.01924348" |
| 1372370_at   | "Rpusd4"               | " -7.3417" | "0.01926714" |
| 1390132_at   | NA                     | " 7.3407"  | "0.01930388" |
| 1388576_at   | "Eif3s9"               | " -7.3315" | "0.01965102" |
| 1391316_at   | NA                     | " 7.3276"  | "0.01979652" |
| 1398326_at   | "MGC105647"            | " 7.3269"  | "0.01982376" |
| 1386978_at   | "Bnip3l"               | " 7.3262"  | "0.01985042" |
| 1373560_at   | "RGD1562836_predicted" | " -7.3249" | "0.01990238" |
| 1393391_at   | NA                     | " -7.3245" | "0.01991705" |
| 1369705_at   | "Xtrp3"                | " 7.3229"  | "0.01998043" |
| 1368943_at   | "Rnase4"               | " -7.3221" | "0.02000902" |
| 1383250_at   | "Utp14a"               | " -7.3219" | "0.02001794" |
| 1396872_at   | NA                     | " 7.3199"  | "0.02009668" |
| 1395613_at   | "Pard3"                | " 7.3188"  | "0.02013963" |
| 1367759_at   | "H1f0"                 | " -7.3180" | "0.02017006" |
| 1373872_at   | NA                     | " 7.3177"  | "0.02018217" |
| 1378070_at   | NA                     | " -7.3163" | "0.02023580" |
| 1373532_at   | "Plekhf1"              | " 7.3119"  | "0.02040968" |
| 1374874_at   | "RGD1561042_predicted" | " 7.3107"  | "0.02045518" |
| 1387186_at   | "Rab9"                 | " 7.3104"  | "0.02046800" |
| 1371277_at   | "Cdx1"                 | " 7.3100"  | "0.02048405" |
| 1380797_at   | "Asb13_predicted"      | " -7.3085" | "0.02054352" |
| 1392097_at   | NA                     | " -7.3081" | "0.02056060" |
| 1388762_at   | "lqgap1_predicted"     | " -7.3070" | "0.02060457" |
| 1371427_at   | "RGD1306911_predicted" | " -7.3061" | "0.02063892" |
| 1389545_at   | "Tb1xr1_predicted"     | " 7.3036"  | "0.02073767" |
| 1383665_at   | NA                     | " 7.3031"  | "0.02076079" |
| 1378146_at   | NA                     | " 7.3027"  | "0.02077601" |
| 1373265_at   | NA                     | " 7.3012"  | "0.02083482" |
| 1390675_at   | NA                     | " -7.3005" | "0.02086466" |
| 1376272_s_at | "Zfpn1a2_predicted"    | " -7.2996" | "0.02089883" |
| 1388770_at   | "RGD1304890"           | " -7.2983" | "0.02095310" |
| 1396254_at   | "Ncoa2"                | " 7.2979"  | "0.02096831" |
| 1379357_at   | "RT1-Aw2"              | " 7.2978"  | "0.02097358" |
| 1388497_at   | "Them2_predicted"      | " 7.2963"  | "0.02103507" |
| 1373791_at   | "RGD1359127"           | " -7.2958" | "0.02105311" |
| 1380387_at   | "RGD1559697_predicted" | " 7.2945"  | "0.02110611" |
| 1383711_at   | "Nmt1"                 | " -7.2937" | "0.02114029" |
| 1370130_at   | "Rhoa"                 | " -7.2917" | "0.02122285" |
| 1390418_at   | "Actr1b"               | " -7.2915" | "0.02122971" |
| 1381082_at   | "RGD1564357_predicted" | " 7.2898"  | "0.02130188" |
| 1383458_at   | NA                     | " 7.2897"  | "0.02130722" |
| 1388829_at   | "LOC361399"            | " -7.2859" | "0.02146120" |
| 1372850_at   | NA                     | " -7.2821" | "0.02162265" |
| 1380848_at   | "LOC361990"            | " -7.2816" | "0.02164094" |
| 1397685_at   | NA                     | " 7.2815"  | "0.02164841" |

|              |                      |         |            |
|--------------|----------------------|---------|------------|
| 1367494_at   | RGD1310899_predicted | -6.8039 | 0.00003986 |
| 1373930_at   | LOC687681            | 6.803   | 0.00003988 |
| 1396029_at   | Pde7b                | 6.8027  | 0.00003988 |
| 1389158_at   | Rtel1                | -6.8028 | 0.00003988 |
| 1376468_at   | Dnd1                 | -6.8011 | 0.00003998 |
| 1388378_at   | Eif3s8               | -6.7982 | 0.00004018 |
| 1374480_at   | Daam1_predicted      | 6.7971  | 0.00004021 |
| 1388102_at   | Ltb4dh               | 6.7971  | 0.00004021 |
| 1378511_at   | Wwox_predicted       | 6.7969  | 0.00004021 |
| 1371042_at   | Map4k3               | 6.7962  | 0.00004025 |
| 1367980_at   | Rabep1               | 6.7949  | 0.00004032 |
| 1376977_at   | Ptger3               | 6.7939  | 0.00004039 |
| 1367470_at   | Sar1a                | -6.7936 | 0.00004039 |
| 1385497_x_at | Lnx1_predicted       | 6.79    | 0.00004065 |
| 1377069_at   | NA                   | 6.7868  | 0.00004088 |
| 1395306_at   | RGD1565549_predicted | 6.7817  | 0.00004124 |
| 1389969_at   | Tomm40               | -6.7817 | 0.00004124 |
| 1372150_at   | Usp10                | -6.7805 | 0.00004131 |
| 1383081_at   | Csf2ra               | -6.7792 | 0.00004139 |
| 1376069_at   | Psmf11_predicted     | -6.7764 | 0.0000416  |
| 1388607_at   | Smurf2_predicted     | 6.7733  | 0.00004182 |
| 1388774_at   | LOC680172            | 6.7695  | 0.00004211 |
| 1383302_at   | Dnajb1_predicted     | -6.7685 | 0.00004214 |
| 1392470_at   | NIPBL                | 6.7687  | 0.00004214 |
| 1387900_at   | Cdipt                | -6.7622 | 0.00004264 |
| 1387160_at   | Kcne3                | -6.761  | 0.00004272 |
| 1376272_s_at | Zfpn1a2_predicted    | -6.7597 | 0.0000428  |
| 1383922_a_at | Ard1_predicted       | -6.7582 | 0.0000429  |
| 1373387_at   | LOC688717            | -6.756  | 0.00004306 |
| 1381925_x_at | Arid1b               | 6.7548  | 0.00004313 |
| 1399090_at   | Dync1li1             | -6.7536 | 0.00004317 |
| 1389380_at   | LOC687266            | -6.754  | 0.00004317 |
| 1388696_at   | Ufd1l                | -6.7536 | 0.00004317 |
| 1376754_at   | Cars_predicted       | -6.753  | 0.00004319 |
| 1370191_at   | Azin1                | -6.7527 | 0.0000432  |
| 1376267_at   | NA                   | -6.751  | 0.00004329 |
| 1379247_at   | RGD1564946_predicted | 6.7512  | 0.00004329 |
| 1381260_at   | RGD1560397_predicted | 6.7503  | 0.00004333 |
| 1372216_at   | NA                   | -6.7462 | 0.00004361 |
| 1389375_at   | NA                   | 6.7462  | 0.00004361 |
| 1372537_at   | NA                   | 6.7466  | 0.00004361 |
| 1395153_at   | Cldn15_predicted     | 6.7449  | 0.00004369 |
| 1372395_at   | RGD1565757_predicted | 6.7434  | 0.00004377 |
| 1393043_at   | Wdr50_predicted      | -6.7435 | 0.00004377 |
| 1374669_at   | LOC309016            | 6.7403  | 0.00004401 |
| 1391821_at   | NA                   | 6.7386  | 0.00004413 |
| 1372489_at   | Slmap_predicted      | 6.738   | 0.00004417 |
| 1377700_at   | NA                   | 6.7344  | 0.00004445 |
| 1372545_at   | NA                   | 6.734   | 0.00004446 |
| 1384017_at   | Lrrk1_predicted      | 6.7334  | 0.00004449 |

|              |                        |            |              |
|--------------|------------------------|------------|--------------|
| 1379406_at   | "RGD1308396_predicted" | " -7.2802" | "0.02170301" |
| 1372742_at   | "Ankmy2_predicted"     | " 7.2771"  | "0.02183280" |
| 1375521_at   | "Tceal8"               | " -7.2744" | "0.02194790" |
| 1389590_at   | NA                     | " 7.2739"  | "0.02196665" |
| 1375432_at   | "LOC679140"            | " -7.2735" | "0.02198622" |
| 1389638_at   | "MGC94288"             | " -7.2719" | "0.02205280" |
| 1381822_x_at | "Trp53rk_predicted"    | " -7.2707" | "0.02210679" |
| 1374777_at   | "LOC502894"            | " -7.2704" | "0.02211751" |
| 1369641_at   | "Pafah1b2"             | " -7.2696" | "0.02215129" |
| 1373527_at   | "LOC680987"            | " -7.2695" | "0.02215651" |
| 1370481_at   | "Scnn1g"               | " -7.2669" | "0.02226938" |
| 1396076_at   | NA                     | " 7.2663"  | "0.02229341" |
| 1389869_at   | "LOC689397"            | " -7.2656" | "0.02232461" |
| 1380405_at   | "Sept8_predicted"      | " -7.2645" | "0.02237296" |
| 1384794_at   | NA                     | " -7.2641" | "0.02239057" |
| 1367646_at   | "Ctsb"                 | " 7.2632"  | "0.02243020" |
| 1388185_at   | "Rb1"                  | " 7.2618"  | "0.02248926" |
| 1393106_x_at | "Gtf2f1"               | " -7.2609" | "0.02252849" |
| 1369635_at   | "Sord"                 | " 7.2604"  | "0.02254968" |
| 1389627_at   | "RGD1306209"           | " -7.2570" | "0.02270071" |
| 1386872_at   | "Igf2r"                | " 7.2561"  | "0.02273985" |
| 1389158_at   | "Rtel1"                | " -7.2548" | "0.02279692" |
| 1373597_at   | "Pop7_predicted"       | " -7.2522" | "0.02291431" |
| 1380301_at   | NA                     | " -7.2519" | "0.02292640" |
| 1391432_at   | "Wdr75"                | " -7.2484" | "0.02308230" |
| 1386886_at   | "Cd164"                | " 7.2480"  | "0.02310007" |
| 1383671_at   | "Adam9"                | " -7.2467" | "0.02315865" |
| 1381609_at   | "Zfp335"               | " -7.2446" | "0.02325694" |
| 1376340_a_at | "Tssc4"                | " -7.2429" | "0.02333400" |
| 1379278_at   | "RGD1311539_predicted" | " 7.2415"  | "0.02339359" |
| 1389680_at   | "Eil2"                 | " 7.2396"  | "0.02348397" |
| 1383795_at   | NA                     | " 7.2382"  | "0.02354525" |
| 1389998_at   | "Nr2f2"                | " -7.2353" | "0.02368036" |
| 1375829_at   | "RGD1308326_predicted" | " -7.2345" | "0.02371455" |
| 1376186_at   | "Waspip"               | " 7.2337"  | "0.02375277" |
| 1369997_at   | "Dvl1"                 | " -7.2329" | "0.02379074" |
| 1390035_at   | "LOC305076"            | " -7.2321" | "0.02382758" |
| 1373869_at   | "Soat1"                | " 7.2298"  | "0.02393286" |
| 1395655_at   | NA                     | " 7.2297"  | "0.02393814" |
| 1367777_at   | "Decr1"                | " 7.2279"  | "0.02402310" |
| 1388766_at   | "Mtx2"                 | " 7.2246"  | "0.02417752" |
| 1367740_at   | "Ckb"                  | " -7.2244" | "0.02418956" |
| 1374543_at   | NA                     | " 7.2237"  | "0.02422221" |
| 1392662_at   | "RGD1566242_predicted" | " -7.2226" | "0.02427186" |
| 1387104_at   | "Scnn1a"               | " -7.2218" | "0.02431128" |
| 1389166_at   | "Cib2"                 | " -7.2212" | "0.02433953" |
| 1376896_at   | "RGD1309308_predicted" | " -7.2182" | "0.02448109" |
| 1389480_at   | "Rwdd4a"               | " -7.2170" | "0.02453997" |
| 1369586_at   | "Mcpt8"                | " 7.2157"  | "0.02460067" |
| 1376800_at   | NA                     | " 7.2141"  | "0.02467620" |

|              |                      |         |            |
|--------------|----------------------|---------|------------|
| 1382679_at   | LOC362703            | -6.7293 | 0.00004482 |
| 1391433_at   | Mte1                 | -6.7291 | 0.00004482 |
| 1383826_at   | Rab40b_predicted     | 6.7283  | 0.00004486 |
| 1372054_at   | NA                   | -6.7276 | 0.0000449  |
| 1391921_at   | Rngtt_predicted      | 6.7265  | 0.00004497 |
| 1376941_at   | Wbscr16_predicted    | -6.7242 | 0.00004515 |
| 1385211_at   | RGD1310951_predicted | 6.7215  | 0.00004536 |
| 1383465_at   | Fbxl14_predicted     | -6.719  | 0.00004556 |
| 1370251_at   | Avpi1                | -6.7186 | 0.00004557 |
| 1382258_at   | Rgnez_predicted      | 6.7171  | 0.00004568 |
| 1372116_at   | Mrps2_predicted      | -6.7167 | 0.00004569 |
| 1372106_at   | Ehd4                 | -6.7146 | 0.00004585 |
| 1370530_a_at | Plid1                | 6.7129  | 0.00004598 |
| 1395578_at   | NA                   | -6.7121 | 0.00004602 |
| 1375185_at   | Ipo7_predicted       | -6.7085 | 0.00004631 |
| 1372409_at   | Mad211bp             | -6.7084 | 0.00004631 |
| 1383660_at   | NA                   | -6.706  | 0.0000465  |
| 1389093_at   | Pak1                 | 6.7048  | 0.00004659 |
| 1391432_at   | Wdr75                | -6.7043 | 0.00004661 |
| 1388514_at   | Ppm1g                | -6.7001 | 0.00004697 |
| 1389459_at   | RGD1306613_predicted | -6.6943 | 0.00004747 |
| 1373405_at   | NA                   | -6.6937 | 0.00004751 |
| 1368021_at   | Adh1                 | 6.6924  | 0.0000476  |
| 1372178_at   | NA                   | 6.692   | 0.00004761 |
| 1389057_at   | Arv1_predicted       | -6.6906 | 0.00004771 |
| 1389697_at   | NA                   | 6.6903  | 0.00004772 |
| 1380561_at   | lars2_predicted      | 6.6854  | 0.00004813 |
| 1384011_a_at | RGD1309729           | -6.6853 | 0.00004813 |
| 1386662_at   | NA                   | -6.6839 | 0.00004822 |
| 1371706_at   | Sdccag3              | -6.684  | 0.00004822 |
| 1375948_at   | Alkbh5_predicted     | -6.683  | 0.00004828 |
| 1376076_at   | Mpp5_predicted       | -6.6797 | 0.00004851 |
| 1383514_s_at | Narg1_predicted      | -6.6799 | 0.00004851 |
| 1368295_at   | Slco2b1              | 6.6798  | 0.00004851 |
| 1388520_at   | Spag9_predicted      | 6.6787  | 0.00004856 |
| 1388410_at   | Ugp2                 | 6.679   | 0.00004856 |
| 1373994_at   | RGD1565557_predicted | 6.677   | 0.00004869 |
| 1393206_at   | NA                   | 6.6748  | 0.00004887 |
| 1393437_at   | NA                   | 6.6739  | 0.00004894 |
| 1367737_at   | Fuca                 | 6.6725  | 0.00004902 |
| 1370309_a_at | Hnrpab               | -6.6728 | 0.00004902 |
| 1380437_at   | NA                   | 6.6713  | 0.00004911 |
| 1376723_a_at | RGD1310651_predicted | -6.671  | 0.00004911 |
| 1393910_at   | RGD1309807           | 6.67    | 0.00004919 |
| 1389308_at   | Dnajb11              | -6.6694 | 0.00004922 |
| 1389182_at   | RGD1311269_predicted | -6.6664 | 0.00004948 |
| 1374432_at   | Alcam                | 6.6656  | 0.00004952 |
| 1384738_at   | Nsf                  | -6.6647 | 0.00004959 |
| 1388655_at   | Ssna1_predicted      | -6.6644 | 0.0000496  |
| 1382596_a_at | RGD1311324           | -6.6619 | 0.00004981 |

|               |                        |            |              |
|---------------|------------------------|------------|--------------|
| 1385953_at    | "MlIt3"                | " 7.2132"  | "0.02472072" |
| 1398325_at    | "Tspan3"               | " -7.2121" | "0.02477415" |
| 1376047_at    | "Paps2_predicted"      | " -7.2114" | "0.02480593" |
| 1393282_at    | "Fshprh1"              | " -7.2103" | "0.02485919" |
| 1376081_at    | "Lcmt2"                | " -7.2097" | "0.02489063" |
| 1386718_at    | "RGD1562954_predicted" | " 7.2088"  | "0.02493320" |
| 1398350_at    | "Basp1"                | " 7.2086"  | "0.02494412" |
| AFFX_Rat_GAPC | "Gapdh"                | " 7.2082"  | "0.02496098" |
| 1375602_at    | "Rin2_predicted"       | " 7.2071"  | "0.02501439" |
| 1398755_at    | "Atp6v0c"              | " -7.2042" | "0.02515803" |
| 1371793_at    | "Ache"                 | " -7.2001" | "0.02536125" |
| 1383047_at    | "Gas6"                 | " -7.1989" | "0.02541727" |
| 1388917_at    | "Myo1d"                | " 7.1968"  | "0.02552436" |
| 1384529_at    | NA                     | " 7.1941"  | "0.02565730" |
| 1374656_at    | "Exoc3"                | " 7.1940"  | "0.02566588" |
| 1370330_at    | "Sipa111"              | " 7.1933"  | "0.02570094" |
| 1373838_at    | "Fut4"                 | " 7.1909"  | "0.02582006" |
| 1376683_at    | NA                     | " 7.1883"  | "0.02594926" |
| 1373038_at    | "MlIt10"               | " 7.1864"  | "0.02604548" |
| 1392938_s_at  | "RGD1306959_predicted" | " -7.1845" | "0.02614448" |
| 1388378_at    | "Eif3s8"               | " -7.1842" | "0.02615909" |
| 1382006_at    | "Snapap"               | " -7.1837" | "0.02618562" |
| 1367565_a_at  | "Fth1"                 | " 7.1835"  | "0.02619423" |
| 1373072_at    | NA                     | " -7.1822" | "0.02626448" |
| 1389336_at    | "Pop5_predicted"       | " -7.1748" | "0.02664347" |
| 1372475_at    | "Pink1_predicted"      | " 7.1742"  | "0.02667706" |
| 1377628_at    | NA                     | " 7.1719"  | "0.02679429" |
| 1393431_at    | "LOC687575"            | " -7.1702" | "0.02688749" |
| 1380941_at    | NA                     | " -7.1682" | "0.02698789" |
| 1374332_at    | "Pdcd11_predicted"     | " -7.1663" | "0.02708826" |
| 1379337_at    | "RGD1307883"           | " -7.1641" | "0.02720948" |
| 1374702_at    | NA                     | " 7.1640"  | "0.02721138" |
| 1378075_at    | "Tm9sf4"               | " -7.1634" | "0.02724316" |
| 1377735_at    | "Snx24"                | " 7.1573"  | "0.02757436" |
| 1395632_at    | NA                     | " -7.1553" | "0.02767836" |
| 1371449_at    | "Pin1_predicted"       | " -7.1529" | "0.02781282" |
| 1392953_at    | "LOC680115"            | " -7.1526" | "0.02782730" |
| 1372546_at    | "Mapkapk3"             | " -7.1509" | "0.02791879" |
| 1398572_at    | "LOC679672"            | " -7.1474" | "0.02810917" |
| 1388397_at    | "Ebna1bp2"             | " -7.1472" | "0.02812012" |
| 1391804_at    | NA                     | " -7.1458" | "0.02819715" |
| 1390576_at    | "LOC684233"            | " -7.1425" | "0.02838038" |
| 1389140_at    | "Spcs2_predicted"      | " 7.1413"  | "0.02844703" |
| 1397101_at    | NA                     | " 7.1402"  | "0.02851224" |
| 1374379_at    | NA                     | " 7.1393"  | "0.02856079" |
| 1371438_at    | "Akna_predicted"       | " 7.1389"  | "0.02858451" |
| 1379932_at    | "Clcn4-2"              | " 7.1388"  | "0.02858837" |
| 1391495_at    | "RGD1311783_predicted" | " -7.1375" | "0.02866207" |
| 1384544_at    | "Pon3"                 | " 7.1359"  | "0.02875173" |
| 1389197_at    | "RGD1306248"           | " -7.1344" | "0.02883576" |

|              |                      |         |            |
|--------------|----------------------|---------|------------|
| 1371437_at   | Sec1311              | -6.6601 | 0.00004996 |
| 1376143_at   | NA                   | -6.6585 | 0.00005006 |
| 1388916_at   | RGD1564074_predicted | 6.6588  | 0.00005006 |
| 1372504_at   | LOC692000            | -6.6573 | 0.00005016 |
| 1382444_at   | NA                   | 6.6567  | 0.00005018 |
| 1383549_at   | RGD1310794           | -6.6566 | 0.00005018 |
| 1392502_at   | LOC682398            | -6.6519 | 0.00005059 |
| 1382166_at   | Srprb                | -6.6518 | 0.00005059 |
| 1373269_at   | NA                   | -6.6511 | 0.00005063 |
| 1368248_at   | Cds1                 | 6.6494  | 0.00005077 |
| 1395520_at   | Rbm28_predicted      | -6.649  | 0.00005079 |
| 1396139_at   | Arhgap26_predicted   | 6.6487  | 0.0000508  |
| 1388708_at   | LOC688813            | -6.6484 | 0.0000508  |
| 1374947_at   | Bcar3_predicted      | -6.6477 | 0.00005084 |
| 1395852_at   | Abca3                | 6.6468  | 0.00005088 |
| 1371806_at   | Dgcr8_predicted      | -6.6468 | 0.00005088 |
| 1372973_at   | Lss                  | 6.6446  | 0.00005108 |
| 1371675_at   | NA                   | 6.6427  | 0.00005123 |
| 1372140_at   | RGD1310326           | 6.64    | 0.00005148 |
| 1389516_at   | LOC680620            | 6.6386  | 0.0000516  |
| 1374058_at   | Ascl3                | -6.638  | 0.00005163 |
| 1375460_at   | RGD1309441_predicted | -6.6368 | 0.00005172 |
| 1370503_s_at | Epb4.113             | 6.635   | 0.00005188 |
| 1389927_at   | NA                   | 6.6327  | 0.00005209 |
| 1380681_at   | LOC685384            | 6.6321  | 0.00005212 |
| 1383108_at   | Taf13_predicted      | -6.6283 | 0.00005243 |
| 1381822_x_at | Trp53rk_predicted    | -6.6288 | 0.00005243 |
| 1388798_at   | Ube2e2               | 6.6285  | 0.00005243 |
| 1369013_a_at | Mrpl17               | -6.6274 | 0.00005249 |
| 1378062_at   | Arhge12              | -6.6243 | 0.00005278 |
| 1376145_at   | Eif2b5               | -6.6233 | 0.00005286 |
| 1376040_at   | Sipa112              | 6.6225  | 0.00005292 |
| 1372081_at   | NA                   | 6.6206  | 0.00005309 |
| 1372612_at   | Dynll2               | -6.6164 | 0.0000535  |
| 1374836_at   | Rnu3ip2_predicted    | -6.6142 | 0.0000537  |
| 1382271_at   | Rps6ka5_predicted    | 6.6118  | 0.00005393 |
| 1369313_at   | Fhl2                 | -6.6113 | 0.00005394 |
| 1394109_at   | Thbs1                | -6.6112 | 0.00005394 |
| 1372011_at   | NA                   | 6.6107  | 0.00005396 |
| 1381814_at   | RGD1566016_predicted | 6.6103  | 0.00005398 |
| 1381404_at   | Mbd1                 | -6.6094 | 0.00005405 |
| 1389580_at   | Smarca3_predicted    | 6.6063  | 0.00005434 |
| 1377738_a_at | Cyhr1                | 6.6051  | 0.00005439 |
| 1373172_at   | NA                   | 6.6051  | 0.00005439 |
| 1383573_at   | Sdccag33_predicted   | 6.6052  | 0.00005439 |
| 1398969_at   | NA                   | -6.6043 | 0.00005445 |
| 1375412_at   | NA                   | 6.5999  | 0.0000549  |
| 1381687_at   | NA                   | -6.5936 | 0.00005555 |
| 1368235_at   | Clk3                 | -6.5925 | 0.00005561 |
| 1384621_at   | NA                   | 6.5926  | 0.00005561 |



|              |                        |            |              |
|--------------|------------------------|------------|--------------|
| 1371848_at   | "LOC687711"            | " -7.1329" | "0.02891954" |
| 1378672_at   | NA                     | " 7.1327"  | "0.02893193" |
| 1374524_at   | "Scly"                 | " 7.1326"  | "0.02894061" |
| 1378346_at   | "Emilin2_predicted"    | " 7.1320"  | "0.02897054" |
| 1369686_at   | "Dclk1"                | " 7.1300"  | "0.02908417" |
| 1374289_at   | "Rpo1-1"               | " -7.1288" | "0.02915276" |
| 1373345_at   | "Amigo2"               | " 7.1287"  | "0.02915920" |
| 1383716_at   | NA                     | " -7.1278" | "0.02921289" |
| 1377180_at   | NA                     | " 7.1249"  | "0.02937682" |
| 1396816_at   | NA                     | " -7.1242" | "0.02941858" |
| 1376100_at   | "Tubb6"                | " -7.1240" | "0.02943253" |
| 1395751_at   | "LOC680927"            | " -7.1217" | "0.02956543" |
| 1383357_a_at | NA                     | " 7.1210"  | "0.02960657" |
| 1372898_at   | "RGD1566204_predicted" | " -7.1192" | "0.02971074" |
| 1388600_at   | NA                     | " -7.1182" | "0.02976964" |
| 1392747_at   | "Fbxo30"               | " -7.1160" | "0.02989316" |
| 1391023_at   | NA                     | " 7.1087"  | "0.03032595" |
| 1390144_at   | "RGD1359108"           | " 7.1074"  | "0.03040326" |
| 1382794_at   | "Galnt10"              | " 7.1066"  | "0.03045354" |
| 1380027_at   | NA                     | " -7.1052" | "0.03053829" |
| 1389203_at   | "LOC690898"            | " -7.1044" | "0.03058630" |
| 1383228_at   | NA                     | " 7.1043"  | "0.03058778" |
| 1377806_at   | "Vezf1_predicted"      | " -7.1008" | "0.03079952" |
| 1374142_at   | "RGD1311589_predicted" | " 7.1007"  | "0.03080478" |
| 1392969_at   | NA                     | " -7.1000" | "0.03085037" |
| 1389556_at   | "Kifap3_predicted"     | " 7.0990"  | "0.03090864" |
| 1392172_at   | "Ccl9"                 | " -7.0983" | "0.03095018" |
| 1390478_at   | "Orc4"                 | " 7.0978"  | "0.03098555" |
| 1387841_at   | "Exoc5"                | " -7.0967" | "0.03104855" |
| 1392301_at   | "Sh3tc1_predicted"     | " 7.0943"  | "0.03119672" |
| 1388709_at   | "LOC362703"            | " -7.0923" | "0.03132026" |
| 1374638_at   | "Pex13_predicted"      | " 7.0903"  | "0.03144480" |
| 1388952_at   | "RGD1307935"           | " 7.0883"  | "0.03156771" |
| 1379384_at   | "Sp1"                  | " -7.0862" | "0.03169643" |
| 1393255_at   | NA                     | " 7.0834"  | "0.03187136" |
| 1389262_at   | NA                     | " -7.0831" | "0.03189116" |
| 1369636_at   | "Sord"                 | " 7.0826"  | "0.03192124" |
| 1378032_at   | "Nfkbiz_predicted"     | " -7.0823" | "0.03194117" |
| 1374548_at   | "Aff4_predicted"       | " -7.0819" | "0.03196863" |
| 1370144_at   | "Gtpbp4"               | " -7.0818" | "0.03197384" |
| 1379415_at   | NA                     | " -7.0807" | "0.03204090" |
| 1370482_at   | "Scnn1b"               | " -7.0778" | "0.03222725" |
| 1384816_at   | "Cxadr"                | " 7.0773"  | "0.03225492" |
| 1372316_at   | "RGD1311939_predicted" | " 7.0741"  | "0.03246188" |
| 1388587_at   | "Ier3"                 | " -7.0721" | "0.03258733" |
| 1393154_at   | NA                     | " 7.0718"  | "0.03260629" |
| 1388450_at   | "Ap1gbp1"              | " -7.0701" | "0.03271623" |
| 1388571_at   | "Syng2"                | " -7.0692" | "0.03277406" |
| 1387342_at   | "Gng5"                 | " -7.0662" | "0.03296717" |
| 1381816_at   | "RGD1309804"           | " 7.0654"  | "0.03302055" |

|            |                      |         |            |
|------------|----------------------|---------|------------|
| 1377872_at | RGD1306936_predicted | -6.5922 | 0.00005562 |
| 1383632_at | NA                   | -6.5915 | 0.00005567 |
| 1370974_at | Vps54                | 6.5901  | 0.00005579 |
| 1371312_at | Chchd2               | -6.5873 | 0.00005607 |

|              |                        |            |              |
|--------------|------------------------|------------|--------------|
| 1372544_at   | NA                     | " 7.0641"  | "0.03310324" |
| 1368818_at   | "Psmc4"                | " 7.0637"  | "0.03313012" |
| 1382500_at   | NA                     | " -7.0597" | "0.03339328" |
| 1369743_a_at | "P2rx4"                | " -7.0592" | "0.03342494" |
| 1388076_at   | "Serbp1"               | " -7.0589" | "0.03344860" |
| 1379257_at   | "Epb4.114a_predicted"  | " 7.0584"  | "0.03348292" |
| 1372829_at   | "Rbm8_predicted"       | " -7.0573" | "0.03355160" |
| 1390384_at   | "RGD1566119_predicted" | " -7.0558" | "0.03365019" |
| 1388916_at   | "RGD1564074_predicted" | " 7.0544"  | "0.03374330" |
| 1380297_at   | NA                     | " 7.0530"  | "0.03383954" |
| 1369868_at   | "lag2"                 | " -7.0513" | "0.03395368" |
| 1388154_at   | "E2f5"                 | " -7.0505" | "0.03400206" |
| 1380228_at   | "RGD1306880_predicted" | " 7.0493"  | "0.03408721" |
| 1377676_at   | "Nucks"                | " -7.0476" | "0.03419700" |
| 1393119_at   | NA                     | " -7.0472" | "0.03422706" |
| 1375651_at   | NA                     | " 7.0428"  | "0.03452740" |
| 1367466_at   | "Prpf8"                | " -7.0405" | "0.03467929" |
| 1367476_at   | "Srp14_predicted"      | " -7.0401" | "0.03470731" |
| 1374437_at   | "Nars"                 | " -7.0392" | "0.03477414" |
| 1371697_at   | "Pnpla2_predicted"     | " 7.0379"  | "0.03485833" |
| 1398897_at   | "Ube2v1_predicted"     | " -7.0323" | "0.03524673" |
| 1388379_at   | "Ptpn11"               | " -7.0309" | "0.03534207" |
| 1378778_a_at | NA                     | " -7.0303" | "0.03538491" |
| 1371388_at   | "Pdhb"                 | " 7.0274"  | "0.03559031" |
| 1370776_a_at | "Kcnk6"                | " -7.0228" | "0.03591321" |
| 1374442_at   | "Sfrs9"                | " -7.0225" | "0.03593910" |
| 1372318_at   | NA                     | " 7.0174"  | "0.03629895" |
| 1371882_a_at | "Sh2bpsm1"             | " -7.0159" | "0.03640951" |
| 1389927_at   | NA                     | " 7.0145"  | "0.03650879" |
| 1390952_at   | NA                     | " -7.0100" | "0.03683688" |
| 1384967_at   | "Sart2_predicted"      | " 7.0063"  | "0.03710734" |
| 1376665_at   | NA                     | " 7.0060"  | "0.03712997" |
| 1389830_at   | "Ubtf"                 | " -7.0047" | "0.03722055" |
| 1374178_at   | NA                     | " 6.9984"  | "0.03768706" |
| 1397953_at   | "LOC687696"            | " -6.9970" | "0.03779102" |
| 1368073_at   | "Irf1"                 | " 6.9963"  | "0.03784331" |
| 1372795_at   | "Txnl4b"               | " -6.9954" | "0.03791573" |
| 1388381_at   | "Eif3s4"               | " -6.9949" | "0.03794778" |
| 1374251_at   | NA                     | " 6.9946"  | "0.03797713" |
| 1376296_at   | "Pik3r1"               | " 6.9935"  | "0.03805531" |
| 1390394_at   | NA                     | " -6.9931" | "0.03808345" |
| 1376291_at   | NA                     | " -6.9909" | "0.03825568" |
| 1392527_at   | "RGD1560220_predicted" | " 6.9899"  | "0.03832580" |
| 1389306_at   | "Cd151"                | " -6.9899" | "0.03832715" |
| 1399014_at   | "Vps4a"                | " -6.9897" | "0.03834687" |
| 1383166_at   | "Ncoa1_predicted"      | " 6.9884"  | "0.03844312" |
| 1391017_at   | "Farp1_predicted"      | " 6.9882"  | "0.03846068" |
| 1398786_at   | "Psmc2"                | " -6.9873" | "0.03852365" |
| 1388392_at   | "Tax1bp3"              | " -6.9870" | "0.03854608" |
| 1371735_at   | NA                     | " -6.9866" | "0.03858154" |

|              |                        |            |              |
|--------------|------------------------|------------|--------------|
| 1381470_at   | NA                     | " 6.9849"  | "0.03870688" |
| 1367750_at   | "Prpsap1"              | " -6.9837" | "0.03880055" |
| 1371214_at   | "Itga7"                | " 6.9835"  | "0.03881655" |
| 1371967_at   | "Mrpl16"               | " -6.9808" | "0.03902758" |
| 1388897_at   | "Wdr5"                 | " -6.9755" | "0.03943420" |
| 1388449_at   | "Eef1b2_predicted"     | " -6.9742" | "0.03953728" |
| 1385553_at   | "LOC689116"            | " 6.9740"  | "0.03955328" |
| 1384791_at   | "B3gnt1_predicted"     | " -6.9738" | "0.03956635" |
| 1391643_at   | NA                     | " -6.9737" | "0.03958110" |
| 1372417_at   | "Sertad1"              | " -6.9723" | "0.03968480" |
| 1399024_at   | "Scyl1"                | " -6.9722" | "0.03969466" |
| 1398801_at   | "Cdk105"               | " -6.9709" | "0.03979457" |
| 1373552_at   | "Las1_predicted"       | " -6.9689" | "0.03995445" |
| 1391230_at   | "Sort1"                | " -6.9686" | "0.03997609" |
| 1395213_at   | "RGD1562620_predicted" | " -6.9682" | "0.04001237" |
| 1384399_at   | "Ankrd50_predicted"    | " 6.9674"  | "0.04007690" |
| 1390803_at   | "Htatsf1_predicted"    | " -6.9670" | "0.04010875" |
| 1386078_at   | "Slc35a1_predicted"    | " 6.9639"  | "0.04035811" |
| 1383176_at   | "RGD1306959_predicted" | " -6.9626" | "0.04046059" |
| 1379704_at   | "Zfp143"               | " -6.9625" | "0.04046938" |
| 1383557_at   | NA                     | " 6.9614"  | "0.04055070" |
| 1391476_at   | NA                     | " -6.9589" | "0.04075379" |
| 1372721_at   | "Zfpn1a2_predicted"    | " -6.9573" | "0.04088483" |
| 1374265_at   | NA                     | " 6.9560"  | "0.04099418" |
| 1383969_at   | "RGD1561832_predicted" | " 6.9517"  | "0.04134534" |
| 1398792_at   | "Psmc1"                | " -6.9514" | "0.04136371" |
| 1383148_at   | NA                     | " 6.9508"  | "0.04141362" |
| 1377235_a_at | "Ppp2r5b"              | " 6.9496"  | "0.04151551" |
| 1383661_at   | "Hs3st3b1_predicted"   | " 6.9473"  | "0.04170520" |
| 1388334_at   | "RGD1563123_predicted" | " 6.9471"  | "0.04172306" |
| 1376660_at   | NA                     | " 6.9459"  | "0.04182001" |
| 1389065_at   | "Rbm34"                | " -6.9452" | "0.04187936" |
| 1380544_at   | NA                     | " -6.9451" | "0.04188414" |
| 1383299_at   | NA                     | " 6.9437"  | "0.04200486" |
| 1390300_at   | NA                     | " 6.9437"  | "0.04200504" |
| 1395730_at   | "RGD1559871_predicted" | " -6.9430" | "0.04206413" |
| 1389381_at   | "Sqstm1"               | " -6.9416" | "0.04217622" |
| 1371324_at   | "LOC680891"            | " -6.9396" | "0.04234959" |
| 1373172_at   | NA                     | " 6.9387"  | "0.04242666" |
| 1374156_at   | "Mpp5_predicted"       | " 6.9384"  | "0.04245117" |
| 1393148_at   | "Gpr137b_predicted"    | " -6.9367" | "0.04259433" |
| 1381612_at   | NA                     | " 6.9349"  | "0.04274205" |
| 1398892_at   | "Npc2"                 | " -6.9326" | "0.04293866" |
| 1395721_at   | "Papss2_predicted"     | " -6.9322" | "0.04297380" |
| 1387911_at   | "Rabggtb"              | " -6.9321" | "0.04298400" |
| 1368465_at   | "Accn1"                | " 6.9319"  | "0.04300155" |
| 1367711_at   | "Psmc2"                | " -6.9311" | "0.04307096" |
| 1375107_at   | NA                     | " 6.9308"  | "0.04309418" |
| 1377758_at   | "Hsd17b13"             | " 6.9301"  | "0.04315385" |
| 1371617_at   | "Psm13_predicted"      | " -6.9293" | "0.04321884" |

|              |                        |            |              |
|--------------|------------------------|------------|--------------|
| 1373965_at   | "RGD1310931_predicted" | " -6.9280" | "0.04333266" |
| 1368268_at   | "Tdg"                  | " -6.9263" | "0.04348395" |
| 1399059_at   | "Ezh1_predicted"       | " -6.9258" | "0.04352295" |
| 1376747_at   | NA                     | " 6.9246"  | "0.04363131" |
| 1381905_at   | "Herpud1"              | " 6.9232"  | "0.04375095" |
| 1373269_at   | NA                     | " -6.9229" | "0.04377929" |
| 1383805_at   | "RGD1561817_predicted" | " 6.9224"  | "0.04382375" |
| 1372602_at   | "RGD1311800"           | " 6.9214"  | "0.04390507" |
| 1368141_at   | "Cnbp1"                | " -6.9214" | "0.04390928" |
| 1374662_at   | "Slc35a1_predicted"    | " 6.9209"  | "0.04395470" |
| 1384296_at   | NA                     | " 6.9208"  | "0.04396091" |
| 1367807_at   | "Plod1"                | " 6.9200"  | "0.04402808" |
| 1371422_at   | "Morf4l2"              | " -6.9183" | "0.04417486" |
| 1367661_at   | "S100a6"               | " -6.9183" | "0.04418125" |
| 1380250_at   | "Sned1"                | " -6.9179" | "0.04421219" |
| 1391460_at   | NA                     | " 6.9174"  | "0.04425470" |
| 1392897_at   | "LOC360990"            | " 6.9166"  | "0.04432386" |
| 1384046_at   | "Mtf1_predicted"       | " -6.9163" | "0.04435576" |
| 1370888_at   | "Cox5a"                | " 6.9151"  | "0.04446197" |
| 1372824_at   | "Plekhf2_predicted"    | " -6.9145" | "0.04451100" |
| 1374266_at   | "Pcdh1_predicted"      | " -6.9132" | "0.04462570" |
| 1389577_at   | "Cirh1a"               | " -6.9113" | "0.04479694" |
| 1373974_at   | "Osbp_predicted"       | " -6.9106" | "0.04486015" |
| 1371822_at   | "Polr3d"               | " -6.9104" | "0.04487492" |
| 1372954_at   | NA                     | " 6.9103"  | "0.04488606" |
| 1377885_at   | "LOC685203"            | " -6.9102" | "0.04490002" |
| 1387299_at   | "Miz1"                 | " -6.9087" | "0.04503102" |
| 1376639_at   | "Rnf126"               | " -6.9037" | "0.04547764" |
| 1382765_at   | "LOC691918"            | " -6.9024" | "0.04559779" |
| 1388754_at   | "Nudt7_predicted"      | " -6.8968" | "0.04611033" |
| 1392960_at   | "RGD1309906"           | " -6.8965" | "0.04613399" |
| 1393228_at   | "Glox1"                | " -6.8962" | "0.04616183" |
| 1377387_a_at | NA                     | " -6.8955" | "0.04623212" |
| 1376990_at   | "RGD1309307_predicted" | " 6.8954"  | "0.04623678" |
| 1376734_at   | NA                     | " -6.8932" | "0.04644610" |
| 1387948_at   | "lck"                  | " 6.8915"  | "0.04659485" |
| 1374222_at   | "Slc22a18"             | " 6.8908"  | "0.04666196" |
| 1385251_at   | "LOC500638"            | " 6.8898"  | "0.04676129" |
| 1376325_at   | "Nfrkb_predicted"      | " -6.8859" | "0.04712274" |
| 1375686_at   | "Ppil3"                | " -6.8850" | "0.04720343" |
| 1374842_at   | "Cebpz_predicted"      | " -6.8838" | "0.04731568" |
| 1373213_at   | "Snap29"               | " -6.8812" | "0.04756424" |
| 1382328_at   | "Gimap1"               | " -6.8806" | "0.04762175" |
| 1379659_at   | "Bmp2k"                | " -6.8804" | "0.04764259" |
| 1374385_at   | "RGD1561319_predicted" | " -6.8793" | "0.04774480" |
| 1389279_at   | NA                     | " -6.8784" | "0.04783596" |
| 1372567_at   | "R3hcc1_predicted"     | " -6.8778" | "0.04788958" |
| 1398853_at   | "Psemb3"               | " -6.8753" | "0.04812465" |
| 1382012_at   | "Rtf1_predicted"       | " -6.8752" | "0.04813615" |
| 1368521_at   | "Napsa"                | " 6.8734"  | "0.04830688" |

|            |                        |            |              |
|------------|------------------------|------------|--------------|
| 1375970_at | NA                     | " 6.8728"  | "0.04836908" |
| 1398758_at | "Arf4"                 | " -6.8719" | "0.04846078" |
| 1390010_at | "Ncoa1_predicted"      | " 6.8716"  | "0.04848330" |
| 1383108_at | "Taf13_predicted"      | " -6.8700" | "0.04863800" |
| 1382526_at | "RGD1309308_predicted" | " -6.8691" | "0.04872998" |
| 1383352_at | NA                     | " -6.8687" | "0.04876467" |
| 1399011_at | "Cops6_predicted"      | " -6.8679" | "0.04884629" |
| 1376062_at | "Sdc1"                 | " -6.8674" | "0.04889538" |
| 1374185_at | "Txndc11_predicted"    | " -6.8669" | "0.04894229" |
| 1377322_at | NA                     | " -6.8667" | "0.04896563" |
| 1373427_at | "Rragd_predicted"      | " 6.8620"  | "0.04941981" |
| 1367513_at | "Tm9sf4"               | " -6.8587" | "0.04974903" |
| 1374737_at | "LOC690308"            | " -6.8577" | "0.04985186" |
| 1373332_at | "Csnk1d"               | " -6.8575" | "0.04987130" |
| 1369156_at | "Frk"                  | " 6.8571"  | "0.04990733" |

**Table S2: A) Genes with Gene Ontology Biological Processing term associated with DNA damage and repair in the AOM versus saline contrast in the proximal colon.**

| Probe set ID | Go Biological Processing Term                  | Gene Name                | Gene Symbol | Pvalue      | Fold change^ |
|--------------|------------------------------------------------|--------------------------|-------------|-------------|--------------|
| 1368311_at   | DNA repair                                     | DNA methyltransferase    | Mgmt        | 3.83E-05    | -1.39476     |
| 1372143_at   | DNA double-strand break processing             | enzyme E2 variant 2      | Ube2v2      | 6.04E-05    | 1.27951      |
| 1389090_at   | DNA synthesis during DNA repair                | interacting protein 1    | Wrnip1      | 0.000285302 | 1.21353      |
| 1389011_at   | DNA repair                                     | MMS21 homolog (S.        | Nsmce2      | 0.000325247 | -1.44944     |
| 1388135_at   | nucleotide-excision repair, DNA damage removal | replication protein A2   | Rpa2        | 0.000537544 | 1.45881      |
| 1379264_at   | DNA repair                                     | zinc and ring finger 1   | Znrf1       | 0.000722048 | -1.15791     |
| 1368947_at   | G2/M transition of mitotic cell cycle          | damage-inducible 45      | Gadd45a     | 0.000749954 | 1.52946      |
| 1373094_at   | nucleotide-excision repair, DNA damage removal | factor II H, polypeptide | Gtf2h1      | 0.000787824 | 1.14086      |
| 1395488_at   | base-excision repair                           | coli)                    | Msh3        | 0.00117105  | -1.38696     |
| 1375956_at   | nucleotide-excision repair, DNA damage removal | menage a trois 1         | Mnat1       | 0.00125185  | -1.25877     |
| 1393596_at   | DNA repair                                     | thalassemia/mental       | Atrx        | 0.00164429  | -1.34289     |
| 1368083_at   | nucleotide-excision repair, DNA damage removal | cyclin H                 | Ccnh        | 0.00208666  | 1.22118      |

**Table S2: B) Genes with Gene Ontology Biological Processing term associated with DNA damage and repair in the AOM versus saline contrast in the distal colon.**

| Probe set ID | Go Biological Processing Term             | Gene Name              | Gene Symbol | Pvalue      | Fold change^ |
|--------------|-------------------------------------------|------------------------|-------------|-------------|--------------|
| 1395488_at   | base-excision repair                      | mutS homolog 3 (E.     | Msh3        | 5.27E-11    | -2.13062     |
| 1393963_at   | base-excision repair                      | coli)                  | Nthl1       | 0.00183121  | -1.1797      |
| 1367676_at   | base-excision repair, DNA ligation        | like 1 (E.coli)        | Hmgb2       | 0.00896885  | -1.19742     |
| 1387026_at   | cell cycle checkpoint                     | 2                      | Smc1a       | 5.08E-06    | -1.1472      |
| 1374011_at   | cell cycle checkpoint                     | of chromosomes 1A      | Erc3        | 0.000222108 | 1.11635      |
| 1371648_at   | cell cycle checkpoint                     | excision repair cross- | Ddb1        | 0.000910499 | 1.14037      |
| 1398881_at   | cell cycle checkpoint                     | complementing rodent   | Ddb1        | 0.00516406  | 1.11167      |
| 1399162_a_at | cell cycle checkpoint                     | repair deficiency,     | Ddb1        | 0.00546849  | 1.10902      |
| 1387977_at   | cell cycle checkpoint_damaged DNA binding | complementation gr     | Nbn         | 0.000113082 | 1.27287      |
| 1372143_at   | DNA double-strand break processing        | binding protein 1      | Ube2v2      | 7.79E-12    | 1.60889      |
| 1397039_at   | DNA metabolic process                     | binding protein 1      | Erc411      | 8.90E-05    | 1.20114      |
| 1368311_at   | DNA repair                                | complementing rodent   | Mgmt        | 1.05E-10    | -1.74489     |
| 1379264_at   | DNA repair                                | repair deficiency,     | Znrf1       | 1.68E-10    | -1.35981     |
| 1389011_at   | DNA repair                                | DNA methyltransferase  | Nsmce2      | 8.80E-10    | -1.95721     |
| 1386910_a_at | DNA repair                                | zinc and ring finger 1 | Apex1       | 9.24E-10    | 1.63157      |
| 1377700_at   | DNA repair                                | MMS21 homolog (S.      | Atrx        | 4.41E-09    | -1.52823     |

|              |                                                         |                          |          |             |          |
|--------------|---------------------------------------------------------|--------------------------|----------|-------------|----------|
| 1374245_at   | DNA repair                                              | joining factor 1         | Nhej1    | 8.79E-08    | -1.58677 |
| 1386683_at   | DNA repair                                              | thalassemia/mental       | Atrx     | 4.83E-07    | -1.72997 |
| 1372548_at   | DNA repair                                              | (photolyase-like)        | Cry2     | 7.34E-07    | -1.57269 |
| 1376687_at   | DNA repair                                              | peptdiase 1              | Usp1     | 4.24E-06    | 1.35579  |
| 1373280_at   | DNA repair                                              | RuvB-like protein 2      | Ruvbl2   | 4.40E-06    | 1.20269  |
| 1392640_at   | DNA repair                                              | (photolyase-like)        | Cry1     | 5.38E-06    | 1.40332  |
| 1372393_at   | DNA repair                                              | F-box only protein 18    | Fbxo18   | 1.06E-05    | -1.15062 |
| 1383184_at   | DNA repair                                              | zinc and ring finger 1   | Znrf1    | 2.79E-05    | -1.26121 |
| 1385616_a_at | DNA repair                                              | function 1 homolog A     | Asf1a    | 4.00E-05    | 1.17955  |
| 1373538_at   | DNA repair                                              | peptdiase 1              | Usp1     | 6.79E-05    | 1.56608  |
| 1369446_at   | DNA repair                                              | (photolyase-like)        | Cry2     | 0.000157113 | -1.25513 |
| 1393367_at   | DNA repair                                              | phosphatase              | Pnkp     | 0.00024632  | 1.13521  |
| 1374788_at   | DNA repair                                              | protein 53 binding       | Trp53bp1 | 0.000304299 | -1.12873 |
| 1393798_at   | DNA repair                                              | thalassemia/mental       | Atrx     | 0.000508777 | -1.74408 |
| 1377648_at   | DNA repair                                              | similarity 120B          | Fam120b  | 0.000655171 | -1.14936 |
| 1368410_at   | DNA repair                                              | glycosylase              | Mpg      | 0.00091798  | 1.16907  |
| 1378640_at   | DNA repair                                              | PHD and RING finger      | Uhrf1    | 0.0017196   | 1.79995  |
| 1368787_at   | DNA repair                                              | mutY homolog (E. coli)   | Mutyh    | 0.00180015  | -1.17966 |
| 1375793_at   | DNA repair                                              | mixed-lineage leukemia   | Mll1     | 0.00186981  | -1.18358 |
| 1393596_at   | DNA repair                                              | thalassemia/mental       | Atrx     | 0.0024896   | -1.26816 |
| 1385006_at   | DNA repair                                              | thalassemia/mental       | Atrx     | 0.00521942  | -1.1863  |
| 1398494_at   | DNA repair                                              | cerevisiae)              | Rev1     | 0.00562161  | 1.14881  |
| 1377137_at   | DNA repair                                              | phosphodiesterase 1      | Tdp1     | 0.00892211  | -1.14795 |
| 1382752_at   | DNA repair                                              | protein 53 binding       | Trp53bp1 | 0.0108457   | -1.1095  |
| 1374210_at   | DNA repair                                              | homolog (S. cerevisiae)  | Nsmce1   | 0.012704    | -1.08763 |
| 1393654_at   | DNA repair                                              | like 1 (E. coli)         | Neil1    | 0.0138863   | 1.14435  |
| 1390384_at   | DNA replication checkpoint                              | member X                 | H2afx    | 3.08E-08    | 1.52198  |
| 1369010_at   | DNA replication checkpoint                              | homolog (S. pombe)       | Chek2    | 0.000196838 | -1.40682 |
| 1388379_at   | DNA replication checkpoint                              | phosphatase, non-        | Ptpn11   | 0.000386222 | 1.11453  |
| 1377967_at   | DNA replication checkpoint                              | DNA replication factor 1 | Cdt1     | 0.000891174 | 1.46323  |
| 1387062_a_at | DNA replication checkpoint                              | homolog (S. pombe)       | Chek1    | 0.000973697 | 1.64014  |
| 1378847_x_at | DNA replication checkpoint                              | member X                 | H2afx    | 0.00177604  | 1.28489  |
| 1387668_at   | DNA replication checkpoint                              | phosphatase, non-        | Ptpn11   | 0.00382196  | 1.14079  |
| 1367697_at   | DNA replication checkpoint                              | protein kinase 14        | Mapk14   | 0.00507796  | -1.15285 |
| 1385090_at   | DNA replication checkpoint                              | pombe)                   | Rad17    | 0.0135581   | 1.10802  |
| 1389090_at   | DNA synthesis during DNA repair                         | interacting protein 1    | Wrnip1   | 0.000195022 | 1.18388  |
| 1372366_at   | double-strand break repair                              | protein, homolog         | Htatip   | 2.10E-07    | 1.27244  |
| 1367455_at   | double-strand break repair                              | protein                  | Vcp      | 5.60E-06    | 1.25116  |
| 1370931_at   | double-strand break repair                              | complementing            | Xrcc5    | 1.60E-05    | -1.18161 |
| 1370537_at   | double-strand break repair                              | complementing            | Xrcc6    | 0.00540641  | 1.16508  |
| 1367500_at   | double-strand break repair via homologous recombination | malformation             | Shfm1    | 1.19E-05    | 1.13522  |

|            |                                                         |                           |         |             |          |
|------------|---------------------------------------------------------|---------------------------|---------|-------------|----------|
| 1393405_at | double-strand break repair via homologous recombination | complementing             | Xrcc2   | 2.11E-05    | 1.4922   |
| 1399143_at | double-strand break repair via homologous recombination | enzyme E2N                | Ube2n   | 9.09E-05    | 1.42579  |
| 1369617_at | double-strand break repair via homologous recombination | enzyme E2N                | Ube2n   | 0.00103024  | 1.3209   |
| 1368947_at | G2/M transition of mitotic cell cycle                   | damage-inducible 45       | Gadd45a | 4.12E-06    | 1.70719  |
| 1374304_at | double-strand break by non-homologous end joining       | complementing             | Xrcc4   | 1.54E-13    | -1.94045 |
| 1367488_at | mismatch repair                                         | 17                        | Ankrd17 | 3.19E-08    | -1.22028 |
| 1399008_at | mismatch repair                                         | 17                        | Ankrd17 | 3.23E-05    | -1.18747 |
| 1384523_at | mismatch repair                                         | increased 1 (S.           | Pms1    | 0.00155457  | -1.23014 |
| 1384119_at | mismatch repair                                         | coli)                     | Mlh3    | 0.00988104  | -1.10683 |
| 1397245_at | nucleotide-excision repair                              | cerevisiae)               | Rad23a  | 8.85E-05    | 1.22301  |
| 1368083_at | nucleotide-excision repair, DNA damage removal          | cyclin H                  | Ccnh    | 2.24E-10    | 1.58756  |
| 1375956_at | nucleotide-excision repair, DNA damage removal          | menage a trois 1          | Mnat1   | 2.31E-10    | -1.6535  |
| 1384029_at | nucleotide-excision repair, DNA damage removal          | pigmentosum,              | Xpa     | 4.09E-07    | -1.48562 |
| 1388135_at | nucleotide-excision repair, DNA damage removal          | replication protein A2    | Rpa2    | 3.03E-06    | 1.59884  |
| 1373094_at | nucleotide-excision repair, DNA damage removal          | factor II H, polypeptide  | Gtf2h1  | 1.63E-05    | 1.16461  |
| 1399032_at | nucleotide-excision repair, DNA damage removal          | complementing rodent      |         |             |          |
| 1372415_at | nucleotide-excision repair, DNA damage removal          | repair deficiency,        | Ercc1   | 0.000223246 | 1.18331  |
|            |                                                         | factor IIH, polypeptide 3 | Gtf2h3  | 0.00268885  | 1.08299  |
|            |                                                         | complementing rodent      |         |             |          |
| 1394686_at | nucleotide-excision repair, DNA damage removal          | repair deficiency,        | Ercc4   | 0.00334532  | 1.19607  |
| 1385803_at | nucleotide-excision repair, DNA damage removal          | factor II H, polypeptide  | Gtf2h2  | 0.00436729  | 1.14548  |
|            |                                                         | complementing rodent      |         |             |          |
| 1383346_at | nucleotide-excision repair, DNA damage removal          | repair deficiency,        | Ercc4   | 0.00494953  | 1.10233  |
| 1382030_at | nucleotide-excision repair, DNA damage removal          | factor II H, polypeptide  | Gtf2h2  | 0.00549515  | 1.17989  |
| 1397557_at | nucleotide-excision repair, DNA damage removal          | factor II H, polypeptide  | Gtf2h1  | 0.00706177  | 1.20328  |
| 1388550_at | nucleotide-excision repair, DNA damage removal          | cerevisiae)               | Rad23b  | 0.00983991  | 1.10832  |
|            |                                                         | complementing rodent      |         |             |          |
| 1383953_at | nucleotide-excision repair, DNA damage removal          | repair deficiency,        | Ercc5   | 0.0147419   | -1.19381 |
| 1372828_at | protein repair                                          | reductase B2              | Msrb2   | 0.00382852  | -1.15413 |
| 1368025_at | response to hypoxia                                     | transcript 4              | Ddit4   | 0.00889726  | 1.36865  |
| 1383597_at | telomere maintenance                                    | 1C, PSO2 homolog (S.      | Dclre1c | 0.00558418  | -1.14432 |

^positive fold change means up with AOM.



**Table S3: Summary of genes<sup>^</sup> validated by real time PCR for microarray differential expression.**

| Gene Symbol | Normalised to Ribosomal Protein<br>Test used | Proximal vs distal     |          | AOM vs saline, all   |          | AOM vs saline, proximal |         | AOM vs saline, distal |          |
|-------------|----------------------------------------------|------------------------|----------|----------------------|----------|-------------------------|---------|-----------------------|----------|
|             |                                              | Expressn ratio         | p-value  | Expressn ratio       | p-value  | Expressn ratio          | p-value | Expressn ratio        | p-value  |
| UDP-GlcNAc  | t test on log of ratio                       | 0.018<br>(0.01-0.03)   | <0.00005 | 0.493<br>(0.65-1.34) | 0.69     | 0.914<br>(0.41-2.01)    | 0.80    | 0.950<br>(0.78-1.16)  | 0.57     |
|             | Wilcoxon signed rank                         |                        | 0.0001   |                      | 0.55     |                         | 0.96    |                       | 0.72     |
| SLC34A2     | t test on log of ratio                       | 0.043<br>(0.03-0.06)   | <0.00005 | 0.780<br>(0.55-2.64) | 0.15     | 0.530<br>(0.29-0.98)    | 0.04    | 1.145<br>(0.92-1.43)  | 0.20     |
|             | Wilcoxon signed rank                         |                        | 0.0001   |                      | 0.76     |                         | 0.44    |                       | 0.24     |
| GlcNAc6ST-1 | t test on log of ratio                       | 0.0086<br>(0.006-0.01) | <0.00005 | 1.014<br>(0.72-1.43) | 0.93     | 1.335<br>(0.67-2.64)    | 0.36    | 0.770<br>(0.65-0.91)  | 0.007    |
|             | Wilcoxon signed rank                         |                        | 0.0001   |                      | 0.74     |                         | 0.24    |                       | 0.03     |
| PRDX6       | t test on log of ratio                       | 2.743<br>(2.26-3.33)   | <0.00005 | 1.180<br>(0.58-1.47) | 0.13     | 1.295<br>(0.88-1.90)    | 0.16    | 1.07<br>(0.81-1.43)   | 0.56     |
|             | Wilcoxon signed rank                         |                        | 0.0001   |                      | 0.29     |                         | 0.20    |                       | 0.88     |
| HOXD10      | t test on log of ratio                       | 0.003<br>(0.002-0.005) | <0.00005 | 0.417<br>(0.29-0.61) | 0.0001   | 0.375<br>(0.169-0.833)  | 0.02    | 0.464<br>(0.38-0.57)  | <0.00005 |
|             | Wilcoxon signed rank                         |                        | 0.0001   |                      | 0.0015   |                         | 0.07    |                       | 0.005    |
| PRKACB      | t test on log of ratio                       | 0.042<br>(0.04-0.05)   | <0.00005 | 0.638<br>(0.54-0.75) | <0.00005 | 0.775<br>(0.59-1.02)    | 0.06    | 0.525<br>(0.45-0.61)  | <0.00005 |
|             | Wilcoxon signed rank                         |                        | 0.0001   |                      | 0.002    |                         | 0.15    |                       | 0.005    |
| CYP4F1      | t test on log of ratio                       | 77.822<br>(66.9-90.4)  | <0.00005 | 0.844<br>(0.67-1.06) | 0.14     | 0.891<br>(0.70-1.13)    | 0.31    | 0.800<br>(0.51-1.25)  | 0.29     |
|             | Wilcoxon signed rank                         |                        | 0.0001   |                      | 0.39     |                         | 0.44    |                       | 0.57     |
| CASC4       | t test on log of ratio                       | 1.782<br>(1.45-2.18)   | <0.00005 | 0.789<br>(0.62-1.01) | 0.06     | 0.919<br>(0.62-1.36)    | 0.64    | 0.677<br>(0.48-0.95)  | 0.03     |
|             | UDP-GlcNAc<br>Wilcoxon signed rank           |                        | 0.0001   |                      | 0.18     |                         | 0.92    |                       | 0.06     |

| Gene Symbol | Normalised to 18s<br>Test used | Proximal vs distal     |          | AOM vs saline, all   |          | AOM vs saline, proximal |         | AOM vs saline, distal |         |
|-------------|--------------------------------|------------------------|----------|----------------------|----------|-------------------------|---------|-----------------------|---------|
|             |                                | Expressn ratio         | p-value  | Expressn ratio       | p-value  | Expressn ratio          | p-value | Expressn ratio        | p-value |
| UDP-GlcNAc  | t test on log of ratio         | 0.018<br>(0.01-0.03)   | <0.00005 | 0.493<br>(0.65-1.34) | 0.69     | 1.049<br>(0.047-2.33)   | 0.89    | 1.042<br>(0.46-2.34)  | 0.91    |
|             | Wilcoxon signed rank           |                        | 0.0001   |                      | 0.55     |                         | 0.57    |                       | 0.96    |
| SLC34A2     | t test on log of ratio         | 0.043<br>(0.03-0.06)   | <0.00005 | 0.780<br>(0.55-2.64) | 0.15     | 0.688<br>(0.30-1.55)    | 0.33    | 1.234<br>(0.70-2.17)  | 0.42    |
|             | Wilcoxon signed rank           |                        | 0.0001   |                      | 0.76     |                         | 0.76    |                       | 0.88    |
| GlcNAc6ST-1 | t test on log of ratio         | 0.0086<br>(0.006-0.01) | <0.00005 | 1.014<br>(0.72-1.43) | 0.93     | 1.496<br>(0.69-3.23)    | 0.27    | 0.857<br>(0.44-1.66)  | 0.61    |
|             | Wilcoxon signed rank           |                        | 0.0001   |                      | 0.74     |                         | 0.24    |                       | 0.96    |
| PRDX6       | t test on log of ratio         | 2.743<br>(2.26-3.33)   | <0.00005 | 1.180<br>(0.58-1.47) | 0.13     | 1.647<br>(1.04-2.61)    | 0.04    | 1.184<br>(0.60-2.35)  | 0.59    |
|             | Wilcoxon signed rank           |                        | 0.0001   |                      | 0.29     |                         | 0.02    |                       | 0.51    |
| HOXD10      | t test on log of ratio         | 0.003<br>(0.002-0.005) | <0.00005 | 0.417<br>(0.29-0.61) | 0.0001   | 0.457<br>(0.13-1.61)    | 0.19    | 0.506<br>(0.23-1.10)  | 0.08    |
|             | Wilcoxon signed rank           |                        | 0.0001   |                      | 0.0015   |                         | 0.96    |                       | 0.96    |
| PRKACB      | t test on log of ratio         | 0.042<br>(0.04-0.05)   | <0.00005 | 0.638<br>(0.54-0.75) | <0.00005 | 0.963<br>(0.60-1.54)    | 0.86    | 0.589<br>(0.30-1.15)  | 0.11    |
|             | Wilcoxon signed rank           |                        | 0.0001   |                      | 0.002    |                         | 0.88    |                       | 0.65    |
| CYP4F1      | t test on log of ratio         | 77.822<br>(66.9-90.4)  | <0.00005 | 0.844<br>(0.67-1.06) | 0.14     | 1.095<br>(0.60-1.99)    | 0.74    | 0.801<br>(0.34-1.88)  | 0.57    |
|             | Wilcoxon signed rank           |                        | 0.0001   |                      | 0.39     |                         | 0.96    |                       | 0.72    |
| CASC4       | t test on log of ratio         | 1.782<br>(1.45-2.18)   | <0.00005 | 0.789<br>(0.62-1.01) | 0.06     | 1.154<br>(0.62-2.15)    | 0.61    | 0.654<br>(0.30-1.41)  | 0.24    |
|             | Wilcoxon signed rank           |                        | 0.0001   |                      | 0.18     |                         | 0.65    |                       | 0.96    |

**^Gene key:** UDP-GlcNAc: betaGal beta-1,3-N-acetylglucosaminyltransferase 7, SLC34A2: solute carrier family 34 (sodium phosphate), member 2; GlcNAc6ST-1: similar to N-acetylglucosamine 6-O-sulfotransferase (predicted), PRDX6: peroxiredoxin 6, HOXD10: homeo box D10 (predicted), PRKACB:protein kinase, cAMP dependent, catalytic, beta; CYP4F1:cytochrome P450, family 4, subfamily f, polypeptide 1, CASC4:cancer susceptibility candidate 4 (predicted).

Table S4: Genes differentially expressed in the p53 signalling pathway

| Symbol   | Entrez Gene Name                                      | Affymetrix   | Fold Change | Location  | Function                | Entrez Gene ID for Human | Entrez Gene ID for Rat |
|----------|-------------------------------------------------------|--------------|-------------|-----------|-------------------------|--------------------------|------------------------|
| ADCK3    | aarF domain containing kinase 3                       | 1372536_at   | -1.741      | Cytoplasm | kinase                  | 56997                    | 360887                 |
| BAX      | BCL2-associated X protein                             | 1369122_at   | 2.034       | Cytoplasm | other                   | 581                      | 24887                  |
| BBC3     | BCL2 binding component 3                              | 1382993_at   | 1.922       | Cytoplasm | other                   | 27113                    | 317673                 |
| C12orf5  | chromosome 12 open reading frame 5                    | 1374777_at   | 1.958       | unknown   | enzyme                  | 57103                    | 502894                 |
| CCNG1    | cyclin G1                                             | 1367764_at   | 4.342       | Nucleus   | other                   | 900                      | 25405                  |
| CDKN1A   | cyclin-dependent kinase inhibitor 1A (p21, Cip1)      | 1387391_at   | 2.131       | Nucleus   | other                   | 1026                     | 114851                 |
| CHEK1    | checkpoint kinase 1                                   | 1387062_a_at | 1.64        | Nucleus   | kinase                  | 1111                     | 140583                 |
| GADD45A  | growth arrest and DNA-damage-inducible, alpha         | 1368947_at   | 1.707       | Nucleus   | other                   | 1647                     | 25112                  |
| GNL3     | guanine nucleotide binding protein-like 3 (nucleolar) | 1388953_at   | 1.88        | Nucleus   | other                   | 26354                    | 290556                 |
| HIPK2    | homeodomain interacting protein kinase 2              | 1373497_at   | -1.904      | Nucleus   | kinase                  | 28996                    | 362342                 |
| JUN      | jun proto-oncogene                                    | 1374404_at   | 1.51        | Nucleus   | transcription regulator | 3725                     | 24516                  |
| KAT2B    | K(lysine) acetyltransferase 2B                        | 1375205_at   | -1.829      | Nucleus   | transcription regulator | 8850                     | 301164                 |
| MDM2     | Mdm2, p53 E3 ubiquitin protein ligase homolog (mouse) | 1383485_at   | 3.435       | Nucleus   | transcription regulator | 4193                     | 314856                 |
| PCNA     | proliferating cell nuclear antigen                    | 1367671_at   | 1.723       | Nucleus   | enzyme                  | 5111                     | 25737                  |
| PIDD     | p53-induced death domain protein                      | 1398569_at   | 1.588       | Cytoplasm | other                   | 55367                    | 293625                 |
| RB1      | retinoblastoma 1                                      | 1388185_at   | -1.499      | Nucleus   | transcription regulator | 5925                     | 24708                  |
| SFN      | stratifin                                             | 1374806_at   | 1.956       | Cytoplasm | other                   | 2810                     | 313017                 |
| STAG1    | stromal antigen 1                                     | 1389226_at   | -2.758      | Nucleus   | other                   | 10274                    | 315958                 |
| TP53INP1 | tumor protein p53 inducible nuclear protein 1         | 1391826_at   | 1.519       | Nucleus   | other                   | 94241                    | 297822                 |
